# Supplementary material for: Legacy effects of statins on cardiovascular and all-cause mortality: a meta-analysis
Source: PubMed Central journal article supplement — BMJ Open. 2018 Oct 4;8(9):e020584. doi: 10.1136/bmjopen-2017-020584 (PMC6173243; doi:10.1136/bmjopen-2017-020584), 2018-10-04
Supplement: bmjopen-2017-020584.draft_revisions.pdf [file bmjopen-2017-020584.draft_revisions.pdf]

# BMJ Open

BMJ Open is committed to open peer review. As part of this commitment we make the peer review history of every article we publish publicly available.

When an article is published we post the peer reviewers' comments and the authors' responses online. We also post the versions of the paper that were used during peer review. These are the versions that the peer review comments apply to.

The versions of the paper that follow are the versions that were submitted during the peer review process. They are not the versions of record or the final published versions. They should not be cited or distributed as the published version of this manuscript.

BMJ Open is an open access journal and the full, final, typeset and author-corrected version of record of the manuscript is available on our site with no access controls, subscription charges or pay-per-view fees (<http://bmjopen.bmj.com>).

If you have any questions on BMJ Open's open peer review process please email [info.bmjopen@bmj.com](mailto:info.bmjopen@bmj.com)

# BMJ Open

## Legacy effects of statins on cardiovascular and all-cause mortality - A meta-analysis

|                               |                                                                                                                                                                                                                                                                                                                                                                                                                                                                |
|-------------------------------|----------------------------------------------------------------------------------------------------------------------------------------------------------------------------------------------------------------------------------------------------------------------------------------------------------------------------------------------------------------------------------------------------------------------------------------------------------------|
| Journal:                      | <i>BMJ Open</i>                                                                                                                                                                                                                                                                                                                                                                                                                                                |
| Manuscript ID                 | bmjopen-2017-020584                                                                                                                                                                                                                                                                                                                                                                                                                                            |
| Article Type:                 | Research                                                                                                                                                                                                                                                                                                                                                                                                                                                       |
| Date Submitted by the Author: | 10-Nov-2017                                                                                                                                                                                                                                                                                                                                                                                                                                                    |
| Complete List of Authors:     | Nayak, Agnish; University of New South Wales , UNSW Medical School<br>Hayen, Andrew; UTS<br>Zhu, Lin; UTS<br>McGeechan, Kevin; The University of Sydney, School of Public Health<br>Glasziou, Paul; Bond University, CREBP<br>Irwig, Les; University of Sydney, School of Public Health<br>Doust, Jenny; Bond University, CREBP<br>Gregory, Gabriel ; University of Sydney, Sydney Medical School<br>Bell, Katy; University of Sydney, School of Public Health |
| Keywords:                     | Hydroxymethylglutaryl-CoA Reductase Inhibitors, Cholesterol, Early Diagnosis, Randomised Controlled Trial, Follow-up Studies, Meta-Analysis                                                                                                                                                                                                                                                                                                                    |
|                               |                                                                                                                                                                                                                                                                                                                                                                                                                                                                |

SCHOLARONE™  
Manuscripts

Peer Review Only

1  
2  
3 **Legacy effects of statins on cardiovascular and all-cause mortality**

4  
5  
6 **- A meta-analysis**

7  
8  
9 **Authors:**

10  
11 Agnish Nayak<sup>a</sup>,

12  
13  
14 Andrew Hayen<sup>b</sup>, PhD

15  
16  
17 Lin Zhu<sup>b</sup>, MPH

18  
19  
20 Kevin McGeechan<sup>c</sup>, PhD

21  
22  
23 Paul Glasziou<sup>d</sup>, PhD

24  
25  
26 Les Irwig<sup>c</sup>, PhD

27  
28  
29 Jenny Doust<sup>d</sup>, PhD

30  
31  
32 Gabriel Gregory<sup>c</sup>,

33  
34  
35 Katy Bell<sup>c,d</sup>, PhD

36  
37  
38 **Text word count:** 3218 words

39  
40  
41 **Affiliations:**

42  
43  
44 a. UNSW Medical School, University of New South Wales, Sydney, NSW, Australia

45  
46  
47 b. Australian Centre for Public and Population Health Research, University of Technology  
48  
49 Sydney, Sydney, NSW, Australia

50  
51  
52 c. School Of Public Health, The University of Sydney, Sydney, NSW, Australia

1  
2  
3 d. Centre for Research in Evidence Based Practice, Bond University, Gold Coast, QLD,  
4  
5 Australia

6  
7  
8 e. Sydney Medical School, The University of Sydney, Sydney, NSW, Australia  
9

10  
11 **Address for correspondence:** Dr Katy Bell, Sydney School of Public Health, The University  
12  
13 of Sydney, Sydney NSW 2006, Australia. Telephone Number +61415764321.  
14

15 [katy.bell@sydney.edu.au](mailto:katy.bell@sydney.edu.au)  
16  
17  
18  
19  
20  
21  
22  
23  
24  
25  
26  
27  
28  
29  
30  
31  
32  
33  
34  
35  
36  
37  
38  
39  
40  
41  
42  
43  
44  
45  
46  
47  
48  
49  
50  
51  
52  
53  
54  
55  
56  
57  
58  
59  
60

## Abstract

**Objectives:** To assess evidence for “legacy” (post-trial) effects on cardiovascular (CVD) and all-cause mortality among adult participants of placebo controlled randomised trials (RCTs) of statins.

**Design:** Meta-analysis of aggregate data

**Setting/Participants:** placebo controlled statins RCTS for primary and secondary CVD prevention

**Methods:** Data Sources: PubMed, Embase from inception and forward citations of Cholesterol Treatment Trialists’ Collaborators RCTs to 16th June 2016.

Study Selection: two independent reviewers identified all statin RCT follow-up reports including  $\geq 1000$  participants, and cardiovascular and all-cause mortality (0.5% of initially identified studies).

Data Extraction and Synthesis: Independent data extraction was done by two reviewers according to PRISMA guidelines.

Main Outcomes: post-trial CVD and all-cause mortality.

**Results:** We included 8 trials, with mean post-trial follow-up ranging from 1.6-15.1 years, and including 13,781 post-trial deaths (6,685 CVD). Direct effects within-trials were greater than legacy effects post-trials. The pooled data from all eight studies showed no evidence overall of legacy effects on CVD mortality, but some evidence of legacy effects on all-cause mortality ( $p=0.01$ ). Exploratory subgroup analysis found possible differences in legacy effect for primary prevention trials compared to secondary prevention trials for both CVD mortality ( $p=0.15$ ) and all-cause mortality ( $p=0.02$ ). Pooled post-trial hazard ratios for the three primary prevention studies demonstrated possible post-trial legacy effects on CVD mortality (HR=0.87; 95% CI 0.79-0.95) and on all-cause mortality (HR=0.90; 95% CI 0.85-0.96).

1  
2  
3 **Conclusions:** Possible post-trial statin legacy effects on all-cause mortality appear to be  
4 driven by the primary prevention studies. Although these relative benefits were smaller than  
5 those observed within-trial, the absolute benefits may be similar for the two time periods.  
6  
7 Analysis of individual patient data from follow-up studies after placebo controlled statin  
8  
9 RCTs in lower risk populations may provide more definitive evidence on whether early  
10  
11 treatment of subclinical atherosclerosis is likely to be beneficial.  
12  
13  
14  
15  
16  
17

18 Abstract word count: 294  
19  
20

### 21 **Keywords**

22  
23 Hydroxymethylglutaryl-CoA Reductase Inhibitors  
24 Cholesterol  
25 Lipids  
26 Early Diagnosis  
27 Randomised Controlled Trial  
28 Follow-up Studies  
29 Meta-Analysis  
30  
31

### 32 **Strengths and limitations of this study**

- 33  
34
- 35 • Our sensitive search strategy means this study is likely to have included all follow-up  
36 reports of the major placebo controlled statin trials, including recent follow-up reports  
37 for two of the studies (WOSCOPS and LIPID).  
38
  - 39 • We focus analysis on the post-trial period which is best for detection of legacy effects,  
40
  - 41 • However, post-trial data are no longer a randomised comparison, and legacy effects  
42 may be larger than we estimated.  
43
  - 44 • The main limitation is that our findings are based on aggregate data, and we did not  
45 have information on whether or not an individual was treated with statins during the  
46 post-trial period, and for how long, as well as their cardiovascular risk factor levels  
47 and other confounders.  
48  
49  
50  
51  
52  
53  
54  
55  
56  
57

1  
2  
3 **Funding statement:** This work was supported by the Australian National Health and  
4  
5 Medical Research Council (Early Career Fellowship No. 1013390, Australia Fellowship No.  
6  
7 527500 and Program Grant No 633003). The funders had no role in design and conduct of the  
8  
9 study; collection, management, analysis, and interpretation of the data; and preparation,  
10  
11 review, or approval of the manuscript.  
12

13  
14 **Competing Interest Statement:** All authors have no competing interests to declare.  
15  
16  
17  
18  
19  
20  
21  
22  
23  
24  
25  
26  
27  
28  
29  
30  
31  
32  
33  
34  
35  
36  
37  
38  
39  
40  
41  
42  
43  
44  
45  
46  
47  
48  
49  
50  
51  
52  
53  
54  
55  
56  
57  
58  
59  
60

## Introduction

'Legacy effects' are treatment effects that persist or emerge at some time after trial treatment ends. The existence, or not, of such legacy effects have important clinical implications, including the potential value of early starting of treatment and the risks of treatment cessation. Although technically even short term or transient improvement or worsening of symptoms and signs may be classified as a legacy effect, most people appear to use the term to indicate sustained clinical benefit or harm.(1-7)

Recently there has been considerable interest in the possible legacy effects of statins,(8, 9) sparked by reports on the long term outcomes for participants of large placebo controlled trials. In some of these reports,(4, 10) there is still a persistent survival advantage to participants who were randomised to statin during the trial, even though there was no or minimal difference in management of participants after the trial ended. Legacy effects could indicate that earlier treatment with statins slows atherosclerotic plaque build-up in arteries and so alters the natural disease progression during a person's lifetime. This is supported by noted differences in long term response to statins for primary prevention trials compared with secondary prevention.(11) To this end, aggressive lipid lowering therapy in much younger individuals with lower risk for cardiovascular disease has been suggested as a possible means of primary prevention. Some have argued for universal screening of cholesterol levels in young people and offering early statin treatment to those with raised levels,(12-14) whereas others have argued that statins be offered to all young people, regardless of cholesterol levels. (5, 15)

At least some of the survival benefit observed on long term follow-up is attributable to the direct treatment effects on cardiovascular disease outcomes observed during the within-trial period. For example, survival curves may be generated by simulating an intervention which only has effects during the trial period, and not after the trial (Figure 1A). A persistent



1  
2  
3 survival benefit is observed, but all of this is due to direct effects during the initial trial period.  
4  
5 If hazard curves are constructed instead, then there is no persistent benefit observed (Figure  
6  
7 1B; details of the methods for the simulation are provided in the Appendix). Although  
8  
9 survival curves like Figure 1A demonstrate that the direct effects of the intervention  
10  
11 (observed during the trial period) are still apparent many years later, they do not provide  
12  
13 evidence of indirect effects after the intervention has ceased. To demonstrate such indirect  
14  
15 effects, or legacy effects, we need to focus on outcomes observed during the post-trial period.  
16  
17 To this end, we aimed to identify and combine estimates of the effect of trial treatment group  
18  
19 allocation on post-trial all-cause and CVD mortality from published reports on the long term  
20  
21 follow-up after placebo controlled trials of statins.  
22  
23

## 24 25 **Methods**

### 26 27 28 **Protocol and Registration**

29  
30 The review protocol was not registered.  
31  
32

### 33 34 **Selection**

35  
36 We performed a systematic search and meta-analysis of all reports on follow-up after  
37  
38 randomized, placebo-controlled studies of adults (age >18 years) of statins with  $\geq 1000$   
39  
40 participants. We excluded studies that did not report mortality data during post-trial follow-  
41  
42 up. The primary outcomes were death due to all-causes and due to cardiovascular disease.  
43  
44

### 45 46 **Search strategy**

47  
48 We identified placebo controlled RCTs of cholesterol lowering treatment from the  
49  
50 Cholesterol Treatment Trialists' Collaboration (16) and ran forward citation searches in  
51  
52 Scopus; search was limited to those citations which included one of the investigators from the  
53  
54 RCT. We searched for additional reports in Medline and Embase with no earliest date  
55  
56

1  
2  
3 restriction, though to 16th June 2016 using the terms listed in Box 1, with no restrictions on  
4  
5 year published, type of publication, or language. We checked references of included studies  
6  
7 to identify further relevant papers and contacted trialists to identify updated or additional  
8  
9 reports.  
10  
11

12 **Box 1: Search strategy:**

13  
14 1 Follow-Up Studies/  
15  
16 4 random\$.tw  
17  
18 7 placebo.tw  
19  
20 9 Hydroxymethylglutaryl-CoA Reductase Inhibitors/  
21  
22 10 cholesterol/  
23  
24 11 lipids/  
25  
26  
27 10 (#1) AND (#2) AND (#3) AND (#9 OR #10 OR #11)  
28  
29

30  
31  
32 **Validity assessment**

33  
34 We extracted data for both within-trial and post-trial periods on the following characteristics  
35  
36 which may bias the estimated legacy effect: Mean follow-up (years), Difference in proportion  
37  
38 taking statins.  
39  
40

41  
42 **Study selection and data abstraction**

43  
44 Two authors (AN and KB) checked the titles and abstracts of all citations identified through  
45  
46 the database searches and forward citation search. Full text was obtained if either author  
47  
48 judged the article potentially relevant. The same two authors then independently checked all  
49  
50 the full text articles for eligibility, resolving disagreements through discussion.  
51  
52

53  
54 Two authors independently extracted clinical data (AN and LZ) using standardized forms,  
55  
56 deciding disagreements through discussion with a third author (KB). We extracted separate  
57  
58

1  
2  
3 data on all-cause mortality and CVD specific mortality for the within-trial and post-trial  
4  
5 periods; the number of people at risk of each type of event at the start of the trial and at the  
6  
7 start of the post-trial follow-up; the proportion of people taking statins within trial and post-  
8  
9 trial; the duration of follow-up within trial and post-trial. We attempted to extract differences  
10  
11 in mean total cholesterol, but these were missing for at least one of the periods in the majority  
12  
13 of studies. Further data on the original trials was obtained from CTTC.(17)  
14  
15

### 16 17 18 **Statistical methods**

19  
20  
21 Summary statistics and plots for individual trials were generated using SAS 9.4.  
22

23  
24  
25 Meta-analytic models of post-trial data were built using STATA (version 14.2).  
26

27  
28 We built post-trial relative risk meta-analytic models for CVD mortality and all-cause  
29  
30 mortality using reported number of events and number at risk for the post-trial period. Our  
31  
32 principal summary measures for the models were relative risk and hazard ratios. We used  
33  
34 adjusted relative risks where these were reported, and calculated unadjusted relative risks  
35  
36 where they were not. We built random effects models for the analysis. We assessed the  
37  
38 heterogeneity of results using visual inspection of forest plots and  $I^2$  statistics, and we  
39  
40 conducted exploratory subgroup analysis using meta-regression to compare primary and  
41  
42 secondary prevention trials. For the subgroup analysis, we tested for subgroup differences  
43  
44 using a permutation test with 1000 permutations(18).  
45  
46

47  
48 We also built hazard ratio meta-analytic models for CVD mortality and all-cause mortality  
49  
50 where these were reported in the primary studies. We undertook sensitivity analysis by  
51  
52 restricting the model to primary prevention trials.  
53  
54  
55  
56  
57

## Results

We identified 21 placebo-controlled RCTs of statins included in the CTTC for forward citation searching(19-39) which retrieved 1353 abstracts (restricting search to reports which included an original trialist as an author). We identified a further 1,802 abstracts from Medline and Embase (searches to 16 June 2016), and after excluding duplicates, 1520 titles and abstracts were screened. We retrieved 61 papers for full text review, 47 of which did not meet our selection criteria (eFigure). Reference searching of the remaining 14 studies identified one further study. Seven of the 15 studies used overlapping data: for each set of potentially overlapping reports, we chose the most recent report. This resulted in eight studies finally included in our review (eTable 1).

The original RCTs ranged in mean duration from 3.2 to 5.2 years, included trials of simvastatin, pravastatin, fluvastatin and atorvastatin, and their primary results were published between 1994 and 2003. Of the randomised participants in each trial, 0 to 52% were women, the mean age ranged from 50 to 75 years, and 1 to 35% were diabetic. Between 8 and 100% had pre-existing CVD: three predominantly primary prevention/asymptomatic populations, and five predominantly secondary prevention/symptomatic populations. The difference in the proportion of people taking a statin in the randomised groups within the trial period (statin – placebo) ranged from 51% to 89%. Hazard ratios (or relative risk ratio estimates when hazard ratios were unknown) for all-cause mortality and CVD-specific mortality within the trial period ranged from 0.70 to 1.02, and 0.64 to 0.96 respectively (eTable 2).

1  
2  
3 The post-trial follow up ranged in mean duration from 1.6 to 15.1 years. The difference in  
4 proportion of people taking a statin in the post-trial period (for those originally randomized to  
5 statin minus those randomized to placebo) ranged from 0 to 4% (unknown for two studies).  
6  
7 Collectively, the included studies reported on post-trial follow-up of 55,732 people with  
8  
9 13,781 deaths which occurred after the trials ended, of which 6,685 were attributed to CVD.  
10  
11 The hazard ratios (or relative risk estimates) for all-cause mortality and CVD-specific  
12  
13 mortality ranged from 0.85 to 1.03, and 0.82 to 1.14 respectively (eTable 3).  
14  
15  
16  
17

### 18 **Individual trials – comparison of within trial and post-trial effects**

19  
20  
21 The results for CVD specific mortality for the individual trials are presented in Table 2 and  
22  
23 Fig 2A. Of the 8 included trials, the six which demonstrated significant reductions in CVD  
24  
25 mortality within the trial period (WOSCOPS, ALERT, SSSS, PROSPER, HPS and LIPID),  
26  
27 showed less benefit in the post-trial period. The two trials without significant reduction in  
28  
29 CVD mortality within the trial period (ALLHAT-LLA and ASCOT-LLA) showed a similar  
30  
31 lack of benefit post-trial. In only one of the 8 trials was there a significant reduction in CVD  
32  
33 mortality for the post-trial period (WOSCOPS).  
34  
35  
36

37  
38 The results for all-cause mortality for the individual trials are presented in eTable 3 and Fig  
39  
40 2B. Of the 8 included trials, the four which demonstrated significant reduction in all-cause  
41  
42 mortality within the trial period (WOSCOPS, SSSS, HPS and LIPID) showed less benefit in  
43  
44 the post-trial period. Three trials without a significant reduction in mortality within the trial  
45  
46 period (ALLHAT-LLA, ALERT and PROSPER) showed a similar lack of benefit post-trial.  
47  
48 One trial (ASCOT-LLA) without a significant reduction in mortality with the trial period  
49  
50 demonstrated more benefit in the post-trial period. In only two of the 8 trials was there a  
51  
52 significant reduction in all-cause mortality in the post-trial period (WOSCOPS and ASCOT-  
53  
54 LLA).  
55  
56  
57

## Post-trial meta-analysis

The relative risk random effect meta-analysis using post-trial data from all eight studies is presented in Fig 3A (CVD mortality) and 3B (all-cause mortality). Although there was no evidence overall of a post-trial (legacy) effect on CVD ( $p=0.15$ ), there was some evidence of a legacy effect on all-cause mortality ( $p=0.01$ ). In the exploratory sub-group analysis there appeared to be a difference in the post-trial (legacy) effect of statins for primary prevention compared with secondary prevention studies for both CVD and for all-cause mortality. The pooled relative risk of CVD death post-trial for those originally allocated statin compared to placebo was 0.91 (0.84-0.98) for primary prevention trials, and 0.99 (0.94-1.05) for secondary prevention trials (permutation test  $p$ -value for sub-group difference= $0.15$ ) (Fig 3A). The pooled relative risk of all-cause death post-trial for those originally allocated statin compared to placebo was 0.92 (0.88-0.96) for primary prevention trials and 0.99 (0.95-1.03) for secondary prevention trials (permutation test  $p$ -value for sub-group difference= $0.02$ ) (Fig 3B).

The hazard ratio meta-analysis, using post-trial data from the 4 studies reporting hazard ratios, is presented in Fig 4A (CVD mortality) and 4B (all-cause mortality). Similar to the meta-analysis of relative risks, there was no definite evidence of a post-trial (legacy) effect on CVD ( $p=0.09$ ), but some evidence of a legacy effect on all-cause mortality ( $p=0.02$ ). Pooling data from all four studies resulted in substantial heterogeneity between studies ( $I^2=40.7\%$  for CVD mortality and  $42.3\%$  for all-cause mortality). Restricting meta-analysis to the three primary prevention trials resulted in very low heterogeneity between studies ( $I^2=0.0\%$  for CVD mortality and  $8.1\%$  for all-cause mortality), and these results are presented in Fig 4C (CVD mortality) and 4D (all-cause mortality). In the three

1  
2  
3 primary prevention trials, the pooled hazard ratio for CVD death post-trial for those originally  
4 allocated statin compared to placebo was 0.87 (0.79 to 0.95,  $p=0.003$ ) and for all-cause death  
5 it was 0.90 (0.85 to 0.96,  $p=0.001$ ).  
6  
7  
8  
9

## 10 11 12 **Discussion**

13  
14 We identified eight large randomized trials which had usable post-trial data to assess legacy  
15 effects. The direct effects of the statins on mortality reduction observed during the trials, were  
16 much larger than potential legacy effects observed post-trial, which suggests the rhetoric on  
17 legacy effects for statins in general may not reflect the empirical evidence. WOSCOPS was  
18 the only trial to show a possible post-trial legacy effect on all-cause and CVD specific  
19 mortality. When we pooled data from all eight studies we found no evidence overall of legacy  
20 effects on CVD mortality, but some evidence of legacy effects on all-cause mortality. In the  
21 exploratory sub-group analysis, there was some evidence of a difference in results for  
22 primary prevention compared with secondary prevention. Considering these subgroups  
23 separately, we found evidence of post-trial legacy effects only where statins were started for  
24 primary prevention – these effects were observed on both CVD mortality (HR=0.87,  $p=0.003$ )  
25 and all-cause mortality (HR=0.90,  $p<0.001$ ) (Fig 4C and 4D). Participants originally  
26 randomised to placebo in two of the primary prevention trials (WOSCOPS and ASCOT-LLA)  
27 had 4% lower rates of using a statin in the first years post-trial, which will exaggerate the  
28 estimated legacy effect (bias away from the null), but this difference is unlikely to account for  
29 all the observed post-trial benefit (whether there was a difference in statin use post-trial in  
30 ALLHAT is not known). The observed post-trial reductions in CVD and all-cause mortality  
31 may potentially represent real legacy effects of statins for populations similar to those at the  
32 time of recruitment into these studies. There may be a higher likelihood of observing legacy  
33  
34  
35  
36  
37  
38  
39  
40  
41  
42  
43  
44  
45  
46  
47  
48  
49  
50  
51  
52  
53  
54  
55  
56  
57  
58  
59  
60

1  
2  
3 effects for statins when this is started for primary prevention, rather than for secondary  
4  
5 prevention.  
6  
7  
8  
9

10  
11 Our sensitive search strategy means this study is likely to have included all follow-up reports  
12  
13 of the major placebo controlled statin trials, including recent follow-up reports for two of the  
14  
15 studies (WOSCOPS and LIPID). Although we believe the post-trial period is the best period  
16  
17 to analyse for detection of legacy effects, these data are no longer a randomised comparison:  
18  
19 some patients randomised to the statin would have been saved from dying, whereas some  
20  
21 patients in the placebo group were not. Hence, there are additional survivors in the statin  
22  
23 group at the beginning of post-trial follow-up who are also likely to be at higher risk of CVD  
24  
25 than survivors in the placebo group. These differences would tend to bias our results towards  
26  
27 the null, and mean that legacy effects may be larger than we estimated. The main limitation  
28  
29 of our report is that because our findings are based on aggregate data, we are unable to assess  
30  
31 the effects of whether or not an individual was treated with statins during the post-trial period,  
32  
33 and for how long, as well as their cardiovascular risk factor levels and other confounders.  
34  
35  
36  
37  
38  
39

40  
41 We did not examine evidence of possible legacy effects on other outcomes such as non-fatal  
42  
43 CVD, or for different post-trial follow-up times within each study, or for the same post-trial  
44  
45 follow-up times between studies. We are aware of four other meta-analyses of data from long  
46  
47 term follow-up after placebo controlled trials of lipid lowering treatment.(40-43) In three of  
48  
49 these reports, the focus appears to have been on persistence of survival benefit, with  
50  
51 comparison of event rates from time of randomisation, rather than post-trial legacy effect.(40,  
52  
53 42, 43) The other meta-analysis reported separate results for the post-trial period using data  
54  
55 from earlier follow-up reports of six of our included trials.(41) That report found evidence of  
56  
57



1  
2  
3 post-trial reduction in CVD mortality and all-cause mortality at two years, and evidence for a  
4 reduction in major coronary events at both two years and over the total post-trial periods. The  
5 authors did not explore possible causes of heterogeneity for the post-trial models such as  
6 whether the primary trial was for primary or secondary prevention.  
7  
8  
9  
10

11  
12  
13  
14  
15 Published trial evidence supports the hypothesis that lowering cholesterol with a statin drug  
16 reduces cardiovascular events.(44) Currently, the principle of using absolute risk to guide  
17 treatment decisions (as recommended by guidelines(45-48)) is that treatment is prioritised for  
18 those at highest short term risk, and people at low short term risk are not treated. Data on the  
19 efficacy and safety of statins has led to treatment thresholds being lowered: in the UK the  
20 threshold was lowered from >20% to >10% ten-year risk of CVD; in the US the threshold is  
21 10% ten-year risk of CVD, with statins also recommended for selected patients with 7.5-10%  
22 ten-year risk.(48) However, as short term risk is largely driven by age, younger people are  
23 unlikely to qualify for statins even with these lowered thresholds. For example, a recent  
24 report found that in the absence of smoking or raised blood pressure, a ten-year risk of CVD  
25 above 5% was infrequent in women younger than 50 and men younger than 40 years resident  
26 in the US.(49) Exploratory subgroup analysis in our study found possible legacy effects of  
27 statins following the primary prevention trials, which warrant further investigation. However,  
28 we note that the participants in WOSCOPS, ALLHAT and ASCOT-LLA had elevated levels  
29 of CVD risk factors (see table 1). Indeed, the majority of these people were likely to have  
30 been well above current treatment thresholds at the time of trial entry, and people with similar  
31 risk levels would now be recommended to start life-long lipid lowering treatment. Legacy  
32 effects in this setting serve to emphasise the benefits of starting primary prevention treatment  
33 early rather than later among people at high short term risk. It does not provide evidence to  
34  
35  
36  
37  
38  
39  
40  
41  
42  
43  
44  
45  
46  
47  
48  
49  
50  
51  
52  
53  
54  
55  
56  
57  
58  
59  
60

1  
2  
3 support earlier treatment for people who have lower short term risk than current treatment  
4  
5 thresholds.  
6  
7  
8  
9

10  
11 “Legacy effects” have been explained as the “memory of a treatment given in an early phase  
12 of a disease which produces benefits long after the cessation of intervention”.(2) They are an  
13 extension of the belief that we should intervene with treatment early on in the course of a  
14 chronic disease/condition; the legacy effect assumes that the duration of the condition  
15 predicts permanent pathological changes which in turn are strong modifiers of treatment  
16 effectiveness. This paradigm has some support from the finding that statins have minimal  
17 effect on CVD prevention in patients with advanced kidney disease who require  
18 haemodialysis, and who have high short term risk of CVD, (50) but reduce CVD events in  
19 patients with earlier chronic kidney disease who are not yet requiring haemodialysis.(51)  
20 There are also some data from a small imaging study of patients with angina to support the  
21 early treatment hypothesis, where similar reduction in lipid levels appeared to result in  
22 reduction in plaque volume only in participants younger than 65 years.(52) In both of these  
23 examples, the comparison is intervening early vs later in patients with clinical disease  
24 (chronic kidney disease or angina), and few would argue against early treatment in these  
25 clinical populations. Our findings suggest there may be a similar case for intervening early  
26 rather than later for those without clinical disease who have a high calculated short term risk  
27 of CVD. Advocates of early intervention argue that people who are at risk of disease in the  
28 long term, but currently displaying no symptoms or signs of disease and at low calculated  
29 short term risk, should also be started on treatment early.(5, 15) But deciding when, and if, to  
30 intervene in these people is much less straight forward.  
31  
32  
33  
34  
35  
36  
37  
38  
39  
40  
41  
42  
43  
44  
45  
46  
47  
48  
49  
50  
51  
52  
53  
54  
55  
56  
57  
58  
59  
60

1  
2  
3 The legacy effect hypothesis for statins - that the earlier you start , the lower your risk of a  
4 CVD event in the long term- has not been tested directly in a RCT comparing statins  
5 commencement at an earlier versus later age, and such a trial is unlikely to eventuate. Indirect  
6 evidence from post-trial follow-up after the large statin trials is likely the next best way to  
7 investigate this. In this analysis of 8 long-term randomized trials, we found possible post-trial  
8 legacy effects of statins on CVD mortality and all-cause mortality for primary prevention.  
9 Although the post-trial relative benefits were clearly smaller than those observed within trials,  
10 the increasing risk with age may mean that the absolute benefits are similar. Analysis of  
11 individual patient data from follow-up studies after placebo similar RCTs in lower risk  
12 populations may provide more definitive evidence on whether early treatment of subclinical  
13 atherosclerosis is likely to be beneficial.  
14  
15  
16  
17  
18  
19  
20  
21  
22  
23  
24  
25  
26  
27  
28  
29

### 30 **Authors contributions**

31  
32  
33 Agnish Nayak acquired, analysed and interpreted the data, contributed to the statistical  
34 analysis, critically revised the manuscript for important intellectual content and approved the  
35 final version.  
36  
37  
38  
39

40 Andrew Hayen undertook the main statistical analysis, interpreted the data, critically revised  
41 the manuscript for important intellectual content and approved the final version.  
42  
43  
44

45 Lin Zhu acquired, analysed and interpreted the data, contributed to the statistical analysis,  
46 critically revised the manuscript for important intellectual content and approved the final  
47 version.  
48  
49  
50

51  
52  
53 Kevin McGeechan interpreted the data, critically revised the manuscript for important  
54 intellectual content and approved the final version.  
55  
56  
57

1  
2  
3 Paul Glasziou interpreted the data, critically revised the manuscript for important intellectual  
4 content and approved the final version  
5  
6

7  
8 Les Irwig obtained funding, interpreted the data, critically revised the manuscript for  
9 important intellectual content and approved the final version  
10  
11

12  
13 Jenny Doust interpreted the data, critically revised the manuscript for important intellectual  
14 content and approved the final version  
15  
16

17  
18 Gabriel Gregory interpreted the data, contributed to the statistical analysis, critically revised  
19 the manuscript for important intellectual content and approved the final version.  
20  
21

22  
23 Katy Bell obtained funding, conceived the study and design, acquired, analysed and  
24 interpreted the data., supervised the study, drafted the manuscript and revised for important  
25 intellectual content and approved the final version. She had full access to all of the data in the  
26 study and takes responsibility for the integrity of the data and accuracy of the data analysis.  
27  
28  
29  
30  
31

32  
33  
34  
35 **Acknowledgements:** We thank Colin McCowan, Chris Packard and Ian Ford for providing  
36 unpublished data on events and hazard ratios for the 15-year post-trial period after  
37 WOSCOPS.  
38  
39  
40  
41

42  
43 **A data sharing statement:** All data are supplied in this publication, no additional data are  
44 available.  
45  
46  
47  
48  
49  
50  
51  
52  
53  
54  
55  
56  
57  
58  
59  
60

## References

1. Chalmers J, Cooper ME. UKPDS and the legacy effect. *N Engl J Med*. 2008;359(15):1618-20.
2. Coppo R. Is a legacy effect possible in IgA nephropathy? *Nephrol Dial Transplant*. 2013;28(7):1657-62.
3. Sever PS, Chang CL, Gupta AK, Whitehouse A, Poulter NR. The Anglo-Scandinavian Cardiac Outcomes Trial: 11-year mortality follow-up of the lipid-lowering arm in the UK. *Eur Heart J*. 2011;32(20):2525-32.
4. Ford I, Murray H, McCowan C, Packard CJ. Long-Term Safety and Efficacy of Lowering Low-Density Lipoprotein Cholesterol With Statin Therapy- 20-Year Follow-Up of West of Scotland Coronary Prevention Study. *Circulation*. 2016;133(11):1073-80.
5. Robinson JG, Gidding SS. Curing atherosclerosis should be the next major cardiovascular prevention goal. *J Am Coll Cardiol*. 2014;63(25 Pt A):2779-85.
6. Sauser K, Levine DA, Hayward RA. A review of the clinical evidence related to early treatment of elevated LDL for cardiovascular primary prevention. *Evid Based Med*. 2015;20(5):162-9.
7. Daniels SR. Prevention of atherosclerotic cardiovascular disease: what is the best approach and how early should we start? *J Am Coll Cardiol*. 2014;63(25 Pt A):2786-8.
8. O'Riordan M. 'Legacy Effects' of Statins: 14% Reduction in Mortality. [updated August 28, 2011; August 4, 2016]. Available from: <http://www.medscape.com/viewarticle/748687>.
9. O'Riordan M. WOSCOPS at 20 years: study shows lifetime benefit with 5 years of statin therapy. [updated November 20, 2014; August 4, 2016]. Available from: <http://www.medscape.com/viewarticle/835238>.
10. Sever PS, Chang CL, Gupta AK, Whitehouse A, Poulter NR. The Anglo-Scandinavian Cardiac Outcomes Trial: 11-year mortality follow-up of the lipid-lowering arm in the UK. *European Heart Journal*. 2011;32(20):2525-32.
11. Packard CJ, Ford I. Long-term follow-up of lipid-lowering trials. *Current opinion in lipidology*. 2015;26(6):572-9.
12. Ridker P, Cook NR. Cholesterol evaluation in young adults: Absence of clinical trial evidence is not a reason to delay screening. *Annals of Internal Medicine*. 2017.
13. Expert panel on integrated guidelines for cardiovascular health and risk reduction in children and adolescents: summary report. *Pediatrics*. 2011;128 Suppl 5:S213-56.
14. Goff DC, Jr., Lloyd-Jones DM, Bennett G, Coady S, D'Agostino RB, Sr., Gibbons R, et al. 2013 ACC/AHA guideline on the assessment of cardiovascular risk: a report of the American College of Cardiology/American Heart Association Task Force on Practice Guidelines. *J Am Coll Cardiol*. 2014;63(25 Pt B):2935-59.
15. Packard CJ, Weintraub WS, Laufs U. New metrics needed to visualize the long-term impact of early LDL-C lowering on the cardiovascular disease trajectory. *Vascular pharmacology*. 2015;71:37-9.
16. Mihaylova B, Emberson J, Blackwell L, Keech A, Simes J, Barnes EH, et al. The effects of lowering LDL cholesterol with statin therapy in people at low risk of vascular disease: meta-analysis of individual data from 27 randomised trials. *Lancet*. 2012;380(9841):581-90.
17. Baigent C, Keech A, Kearney PM, Blackwell L, Buck G, Pollicino C, et al. Efficacy and safety of cholesterol-lowering treatment: prospective meta-analysis of data from 90,056 participants in 14 randomised trials of statins. *Lancet*. 2005;366(9493):1267-78.
18. Higgins JP, Thompson SG. Controlling the risk of spurious findings from meta-regression. *Stat Med*. 2004;23(11):1663-82.
19. UK Prospective Diabetes Study Group. Tight blood pressure control and risk of macrovascular and microvascular complications in type 2 diabetes: UKPDS 38. *BMJ*. 1998;317:703-13.
20. GISSI Prevenzione Investigators. Results of the low-dose (20 mg) pravastatin GISSI Prevenzione trial in 4271 patients with recent myocardial infarction: do stopped trials contribute to overall knowledge? *Ital Heart J*. 2000;1(12):810-20.

21. Major outcomes in moderately hypercholesterolemic, hypertensive patients randomized to pravastatin vs usual care: The Antihypertensive and Lipid-Lowering Treatment to Prevent Heart Attack Trial (ALLHAT-LLT). *JAMA*. 2002;288(23):2998-3007.
22. Colhoun HM, Betteridge DJ, Durrington PN, Hitman GA, Neil HA, Livingstone SJ, et al. Primary prevention of cardiovascular disease with atorvastatin in type 2 diabetes in the Collaborative Atorvastatin Diabetes Study (CARDS): multicentre randomised placebo-controlled trial. *Lancet*. 2004;364(9435):685-96.
23. Downs JR, Clearfield M, Weis S, Whitney E, Shapiro DR, Beere PA, et al. Primary prevention of acute coronary events with lovastatin in men and women with average cholesterol levels: results of AFCAPS/TexCAPS. Air Force/Texas Coronary Atherosclerosis Prevention Study. *JAMA*. 1998;279(20):1615-22.
24. Fellström BC, Jardine AG, Schmieder RE, Holdaas H, Bannister K, Beutler J, et al. Rosuvastatin and Cardiovascular Events in Patients Undergoing Hemodialysis. *N Engl J Med*. 2009;360(14):1395-407.
25. The Long-Term Intervention with Pravastatin in Ischaemic Disease Study Group. Prevention of Cardiovascular Events and Death with Pravastatin in Patients with Coronary Heart Disease and a Broad Range of Initial Cholesterol Levels. *N Engl J Med*. 1998;339(19):1349-57.
26. Holdaas H, Fellstrom B, Jardine AG, Holme I, Nyberg G, Fauchald P, et al. Effect of fluvastatin on cardiac outcomes in renal transplant recipients: a multicentre, randomised, placebo-controlled trial. *Lancet*. 2003;361(9374):2024-31.
27. Kjekshus J, Apetrei E, Barrios V, Böhm M, Cleland JGF, Cornel JH, et al. Rosuvastatin in Older Patients with Systolic Heart Failure. *N Engl J Med*. 2007;357(22):2248-61.
28. Knopp RH, d'Emden M, Smilde JG, Pocock SJ. Efficacy and safety of atorvastatin in the prevention of cardiovascular end points in subjects with type 2 diabetes: the Atorvastatin Study for Prevention of Coronary Heart Disease Endpoints in non-insulin-dependent diabetes mellitus (ASPEN). *Diabetes Care*. 2006;29(7):1478-85.
29. Koren MJ, Hunninghake DB. Clinical outcomes in managed-care patients with coronary heart disease treated aggressively in lipid-lowering disease management clinics: the alliance study. *J Am Coll Cardiol*. 2004;44(9):1772-9.
30. Nakamura H, Arakawa K, Itakura H, Kitabatake A, Goto Y, Toyota T, et al. Primary prevention of cardiovascular disease with pravastatin in Japan (MEGA Study): a prospective randomised controlled trial. *Lancet*. 2006;368(9542):1155-63.
31. Ridker PM, Danielson E, Fonseca FAH, Genest J, Gotto AMJ, Kastelein JJP, et al. Rosuvastatin to Prevent Vascular Events in Men and Women with Elevated C-Reactive Protein. *N Engl J Med*. 2008;359(21):2195-207.
32. Sacks FM, Pfeffer MA, Moye LA, Rouleau JL, Rutherford JD, Cole TG, et al. The effect of pravastatin on coronary events after myocardial infarction in patients with average cholesterol levels. Cholesterol and Recurrent Events Trial investigators. *N Engl J Med*. 1996;335(14):1001-9.
33. Scandinavian Simvastatin Survival Study G. Randomised trial of cholesterol lowering in 4444 patients with coronary heart disease: the Scandinavian Simvastatin Survival Study (4S). *Lancet*. 1994;344(8934):1383-9.
34. Serruys PW, de Feyter P, Macaya C, Kokott N, Puel J, Vrolix M, et al. Fluvastatin for prevention of cardiac events following successful first percutaneous coronary intervention: a randomized controlled trial. *JAMA*. 2002;287(24):3215-22.
35. Sever PS, Dahlof B, Poulter NR, Wedel H, Beevers G, Caulfield M, et al. Prevention of coronary and stroke events with atorvastatin in hypertensive patients who have average or lower-than-average cholesterol concentrations, in the Anglo-Scandinavian Cardiac Outcomes Trial--Lipid Lowering Arm (ASCOT-LLA): a multicentre randomised controlled trial. *Lancet*. 2003;361(9364):1149-58.

- 1  
2  
3 36. Shepherd J, Blauw GJ, Murphy MB, Bollen EL, Buckley BM, Cobbe SM, et al. Pravastatin in  
4 elderly individuals at risk of vascular disease (PROSPER): a randomised controlled trial. *Lancet*.  
5 2002;360(9346):1623-30.
- 6 37. Shepherd J, Cobbe SM, Ford I, Isles CG, Lorimer AR, Macfarlane PW, et al. Prevention of  
7 Coronary Heart Disease with Pravastatin in Men with Hypercholesterolemia. *N Engl J Med*.  
8 1995;333(20):1301-8.
- 9 38. Tavazzi L, Maggioni AP, Marchioli R, Barlera S, Franzosi MG, Latini R, et al. Effect of  
10 rosuvastatin in patients with chronic heart failure (the GISSI-HF trial): a randomised, double-blind,  
11 placebo-controlled trial. *Lancet*. 2008;372(9645):1231-9.
- 12 39. Wanner C, Krane V, Marz W, Olschewski M, Mann JF, Ruf G, et al. Atorvastatin in patients  
13 with type 2 diabetes mellitus undergoing hemodialysis. *N Engl J Med*. 2005;353(3):238-48.
- 14 40. Kostis WJ, Moreyra AE, Cheng JQ, Dobrzynski JM, Kostis JB. Continuation of mortality  
15 reduction after the end of randomized therapy in clinical trials of lipid-lowering therapy. *J Clin Lipidol*.  
16 2011;5(2):97-104.
- 17 41. Lv HL, Jin DM, Liu M, Liu YM, Wang JF, Geng DF. Long-term efficacy and safety of statin  
18 treatment beyond six years: a meta-analysis of randomized controlled trials with extended follow-up.  
19 *Pharmacological research*. 2014;81:64-73.
- 20 42. Fulcher J, O'Connell R, GebSKI V, Keech A. Abstract 17765: A Meta-analysis of Outcomes at  
21 Two and Five Years After the Conclusion of Randomised Controlled Trials of Statin Therapy.  
22 *Circulation*. 2015;132(Suppl 3):A17765.
- 23 43. Hirakawa Y, Arima H, Rodgers A, Woodward M, Chalmers J. Cumulative in-trial and post-trial  
24 effects of blood pressure and lipid lowering: systematic review and meta-analysis. *J Hypertens*.  
25 2017;35(5):905-13.
- 26 44. Collins R, Reith C, Emberson J, Armitage J, Baigent C, Blackwell L, et al. Interpretation of the  
27 evidence for the efficacy and safety of statin therapy. *Lancet*. 2016;388(10059):2532–61.
- 28 45. Stone NJ, Robinson JG, Lichtenstein AH, Bairey Merz CN, Blum CB, Eckel RH, et al. 2013  
29 ACC/AHA guideline on the treatment of blood cholesterol to reduce atherosclerotic cardiovascular  
30 risk in adults: a report of the American College of Cardiology/American Heart Association Task Force  
31 on Practice Guidelines. *Circulation*. 2014;129((suppl 2)):S1-S45.
- 32 46. Therapeutic Guidelines Limited. Cardiovascular disease risk stratification- eTG Complete.  
33 Melbourne, Australia: 2016.
- 34 47. Cardiovascular Disease Risk Assessment Steering Group. Cardiovascular Disease Risk  
35 Assessment- New Zealand Primary Care Handbook 2012. New Zealand Ministry of Health, 2013.
- 36 48. National Institute for Health and Care Excellence. Cardiovascular disease: risk assessment  
37 and reduction, including lipid modification (Clinical Guideline CG 181) London: NICE; [updated  
38 September 2016; cited 2016 August 4]. CG181:[Available from:  
39 <https://www.nice.org.uk/guidance/CG181/chapter/1-Recommendations>.  
40
- 41 49. Patel KK, Taksler GB, Hu B, Rothberg MB. Prevalence of elevated cardiovascular risks in  
42 young adults: A cross-sectional analysis of national health and nutrition examination surveys. *Annals*  
43 *of Internal Medicine*. 2017.
- 44 50. Palmer SC, Navaneethan SD, Craig JC, Johnson DW, Perkovic V, Nigwekar SU, et al. HMG CoA  
45 reductase inhibitors (statins) for dialysis patients. *Cochrane Database Syst Rev*. 2013(9).
- 46 51. Palmer SC, Navaneethan SD, Craig JC, Johnson DW, Perkovic V, Hegbrant J, et al. HMG CoA  
47 reductase inhibitors (statins) for people with chronic kidney disease not requiring dialysis. *Cochrane*  
48 *Database Syst Rev*. 2014(5).
- 49 52. Nozue T, Yamamoto S, Tohyama S, Fukui K, Umezawa S, Onishi Y, et al. Impacts of age on  
50 coronary atherosclerosis and vascular response to statin therapy. *Heart Vessels*. 2014;29(4):456-63.  
51  
52  
53  
54  
55  
56  
57  
58  
59  
60



## Figures

### **Fig 1. Survival and Hazard curves using simulated data where there is no legacy effect.**

1A: Survival Curves; 1B: Hazard Curves

During RCT period (5 years): Relative Risk Reduction for CVD mortality=0.80; during post-trial period (20 years): Relative Risk Reduction for CVD mortality =1 (i.e. no legacy effect).

A persistent benefit is observed in the Survival Curve which is due entirely to the within-trial treatment effect. The lack of a post-trial legacy effect is more clearly shown in the Hazard Curve.

### **Fig 2. Direct (within-trial) and legacy (post-trial) effects of statins**

2A: CVD mortality; 2B: All-cause mortality.

### **Fig 3. Random effects meta-analysis of relative risks for legacy (post-trial) effects of statins**

3A: CVD mortality; 3B: All-cause mortality

### **Fig 4: Random effects meta-analysis of Hazard Ratios for legacy (post-trial) effects of statins**

4A: CVD mortality for 4 trials; 4B: All-cause mortality for 4 trials; 4C: CVD mortality for 3 primary prevention trials; 4D: All-cause mortality for 3 primary prevention trials



Fig 1A. Survival curves using simulated data where there is no legacy effect.

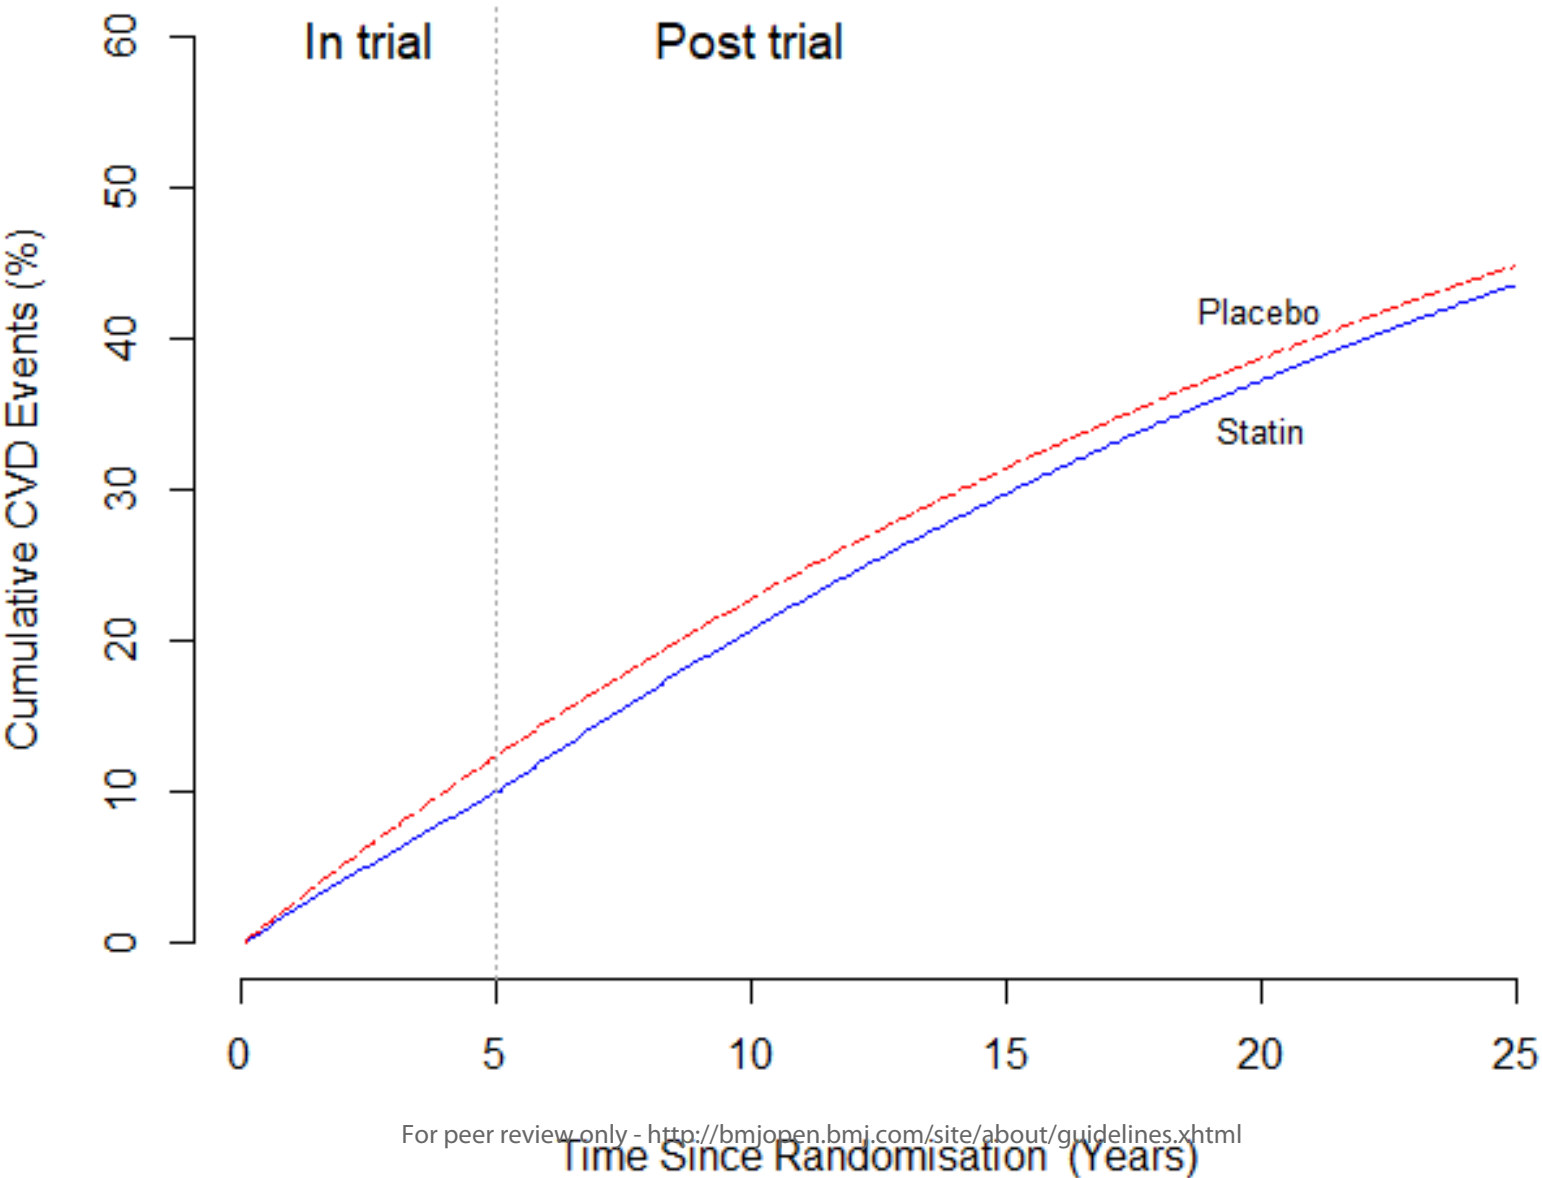

1  
2  
3  
4  
5  
6  
7  
8  
9  
10  
11  
12  
13  
14  
15  
16  
17  
18  
19  
20  
21  
22  
23  
24  
25  
26  
27  
28  
29  
30  
31  
32  
33  
34  
35  
36  
37  
38  
39  
40  
41

Fig 1B. Hazard curves using simulated data where there is no legacy effect.

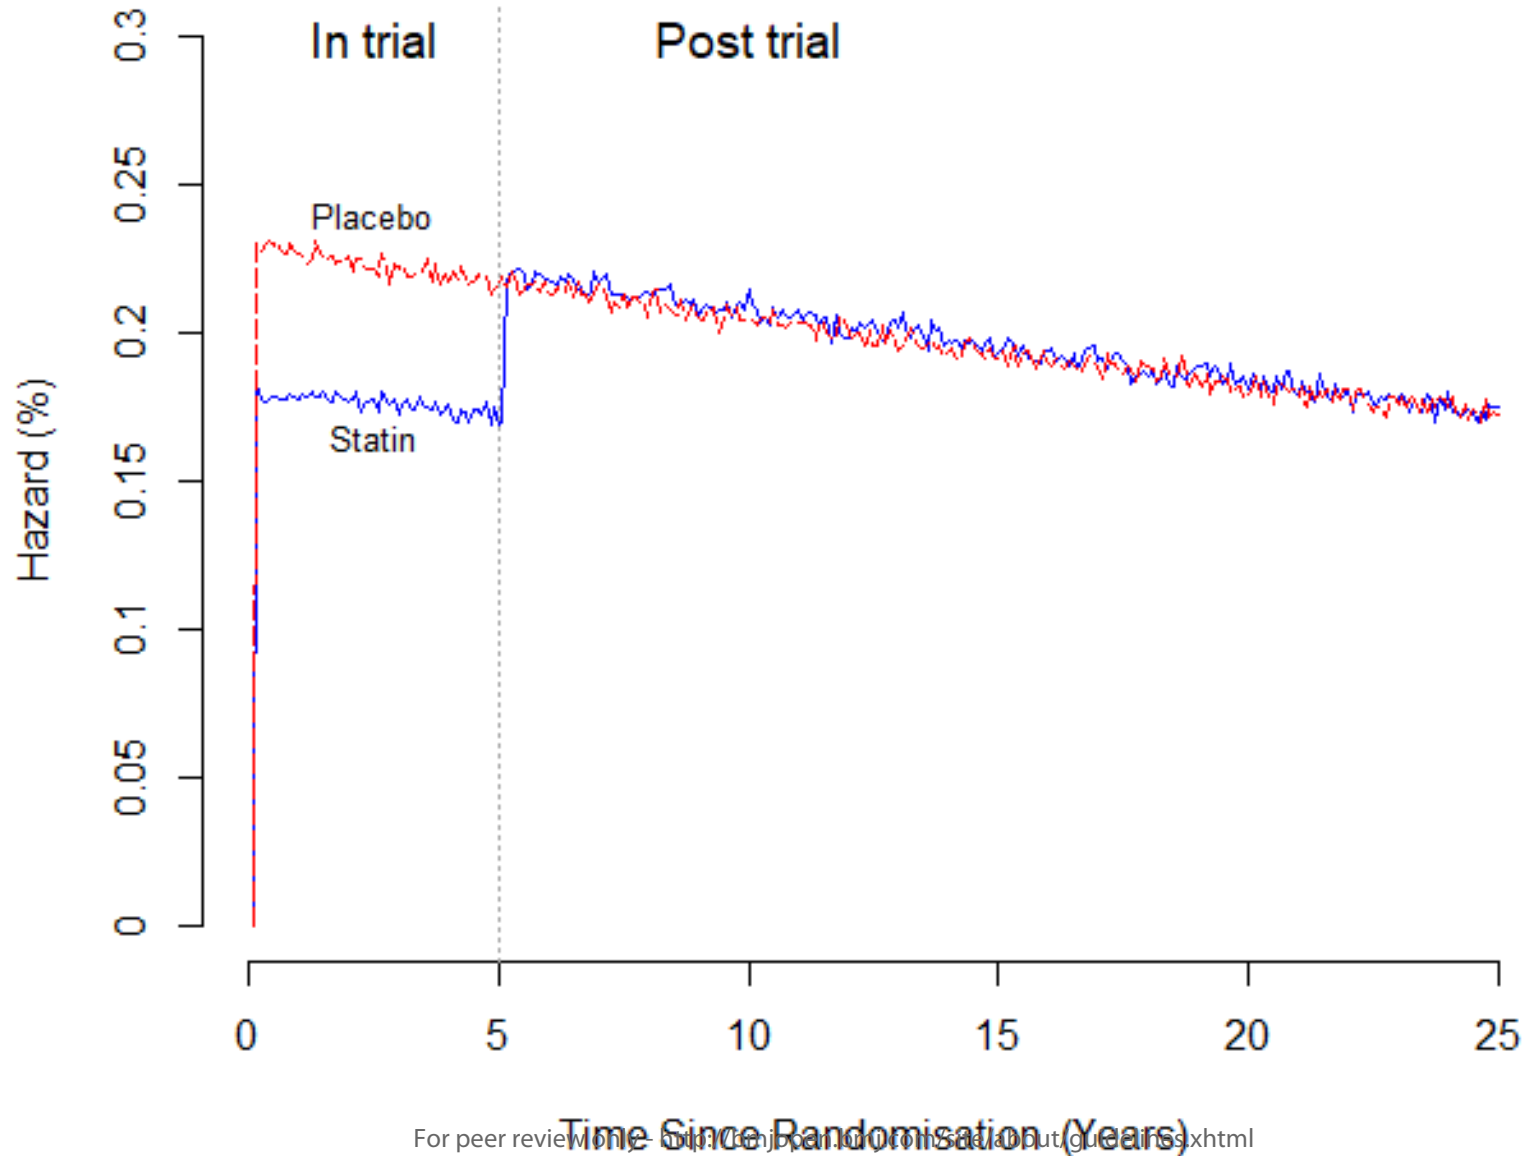

1  
2  
3  
4  
5  
6  
7  
8  
9  
10  
11  
12  
13  
14  
15  
16  
17  
18  
19  
20  
21  
22  
23  
24  
25  
26  
27  
28  
29  
30  
31  
32  
33  
34  
35  
36  
37  
38  
39  
40  
41

# Fig 2A. Direct (within-trial) and legacy (post-trial) effects of statins on CVD mortality

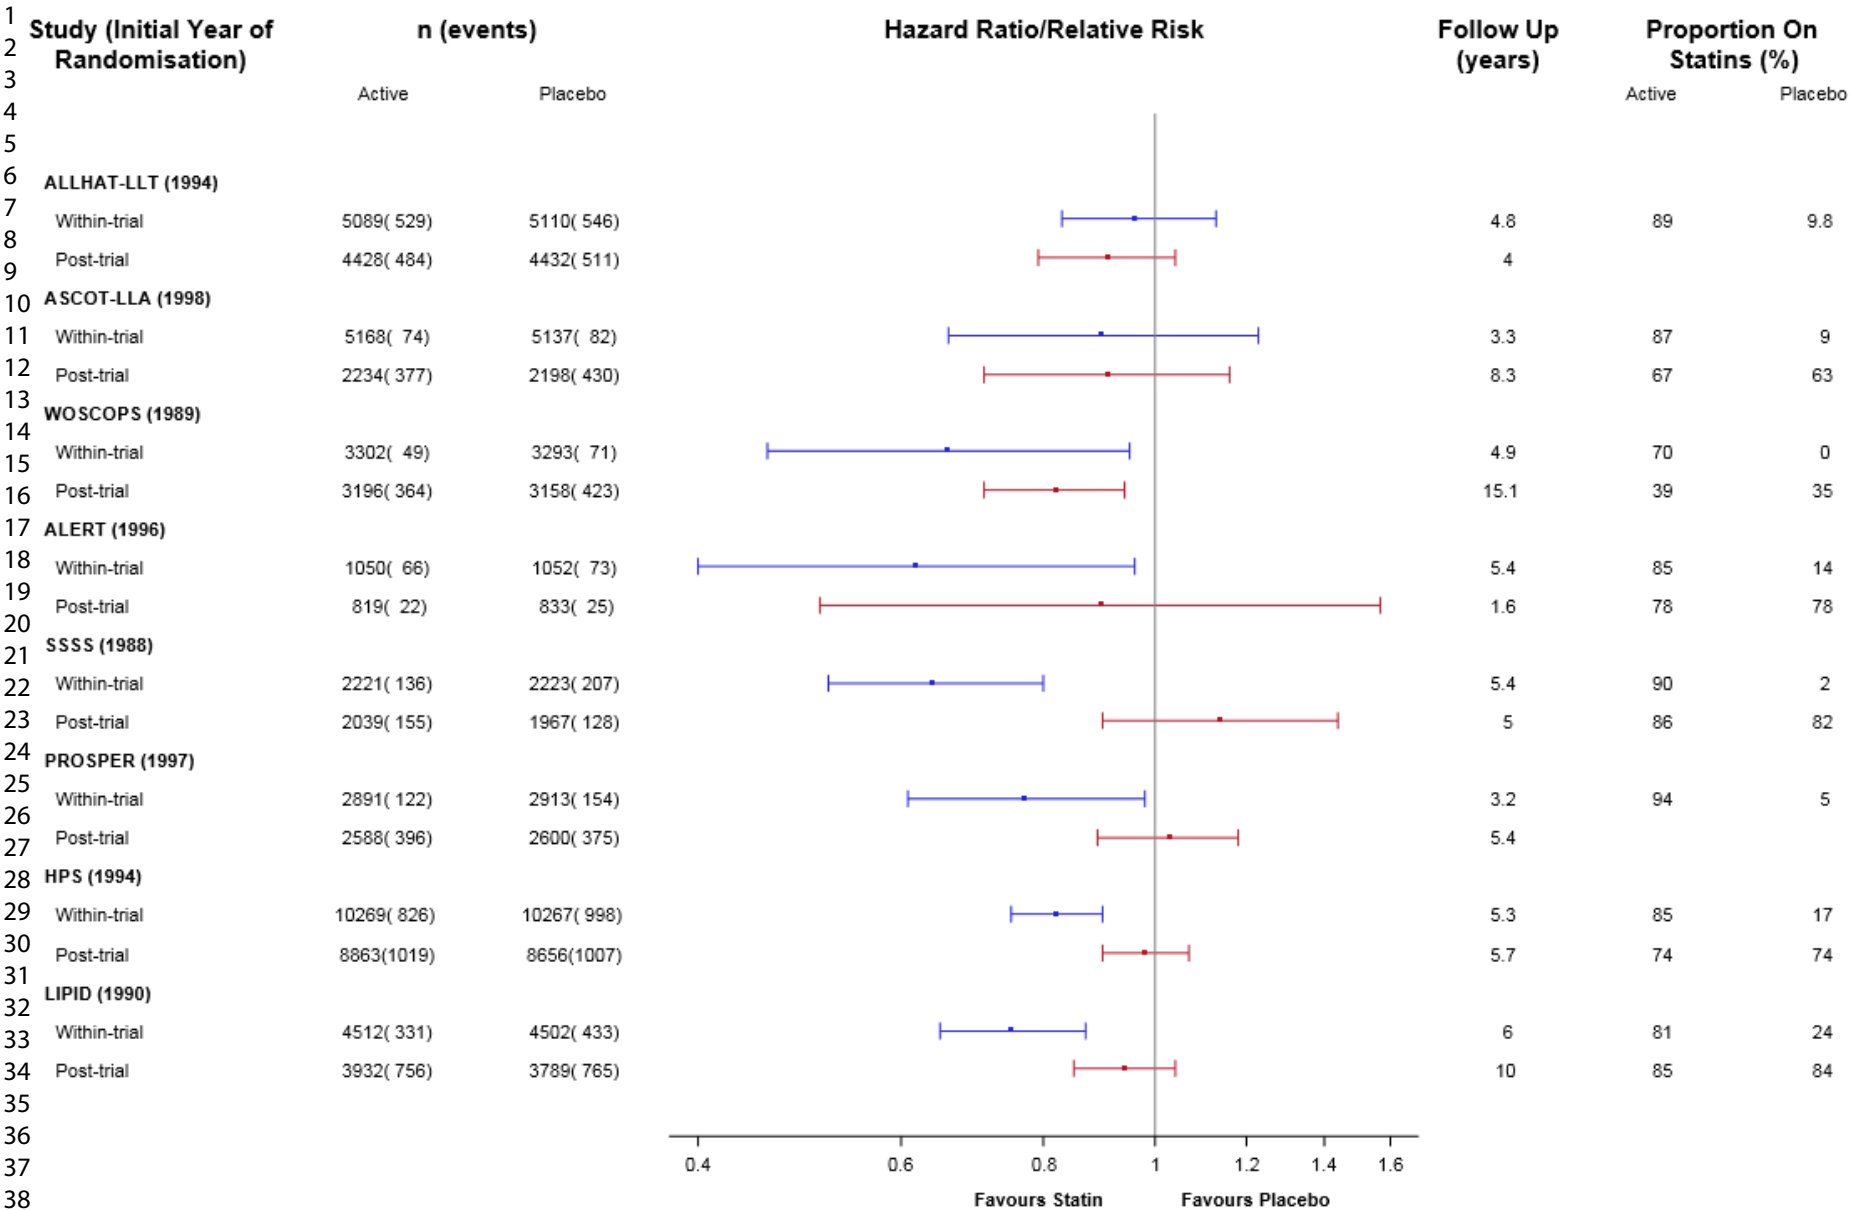

Fig 2B. Direct (within-trial) and legacy (post-trial) effects of statins on All cause mortality

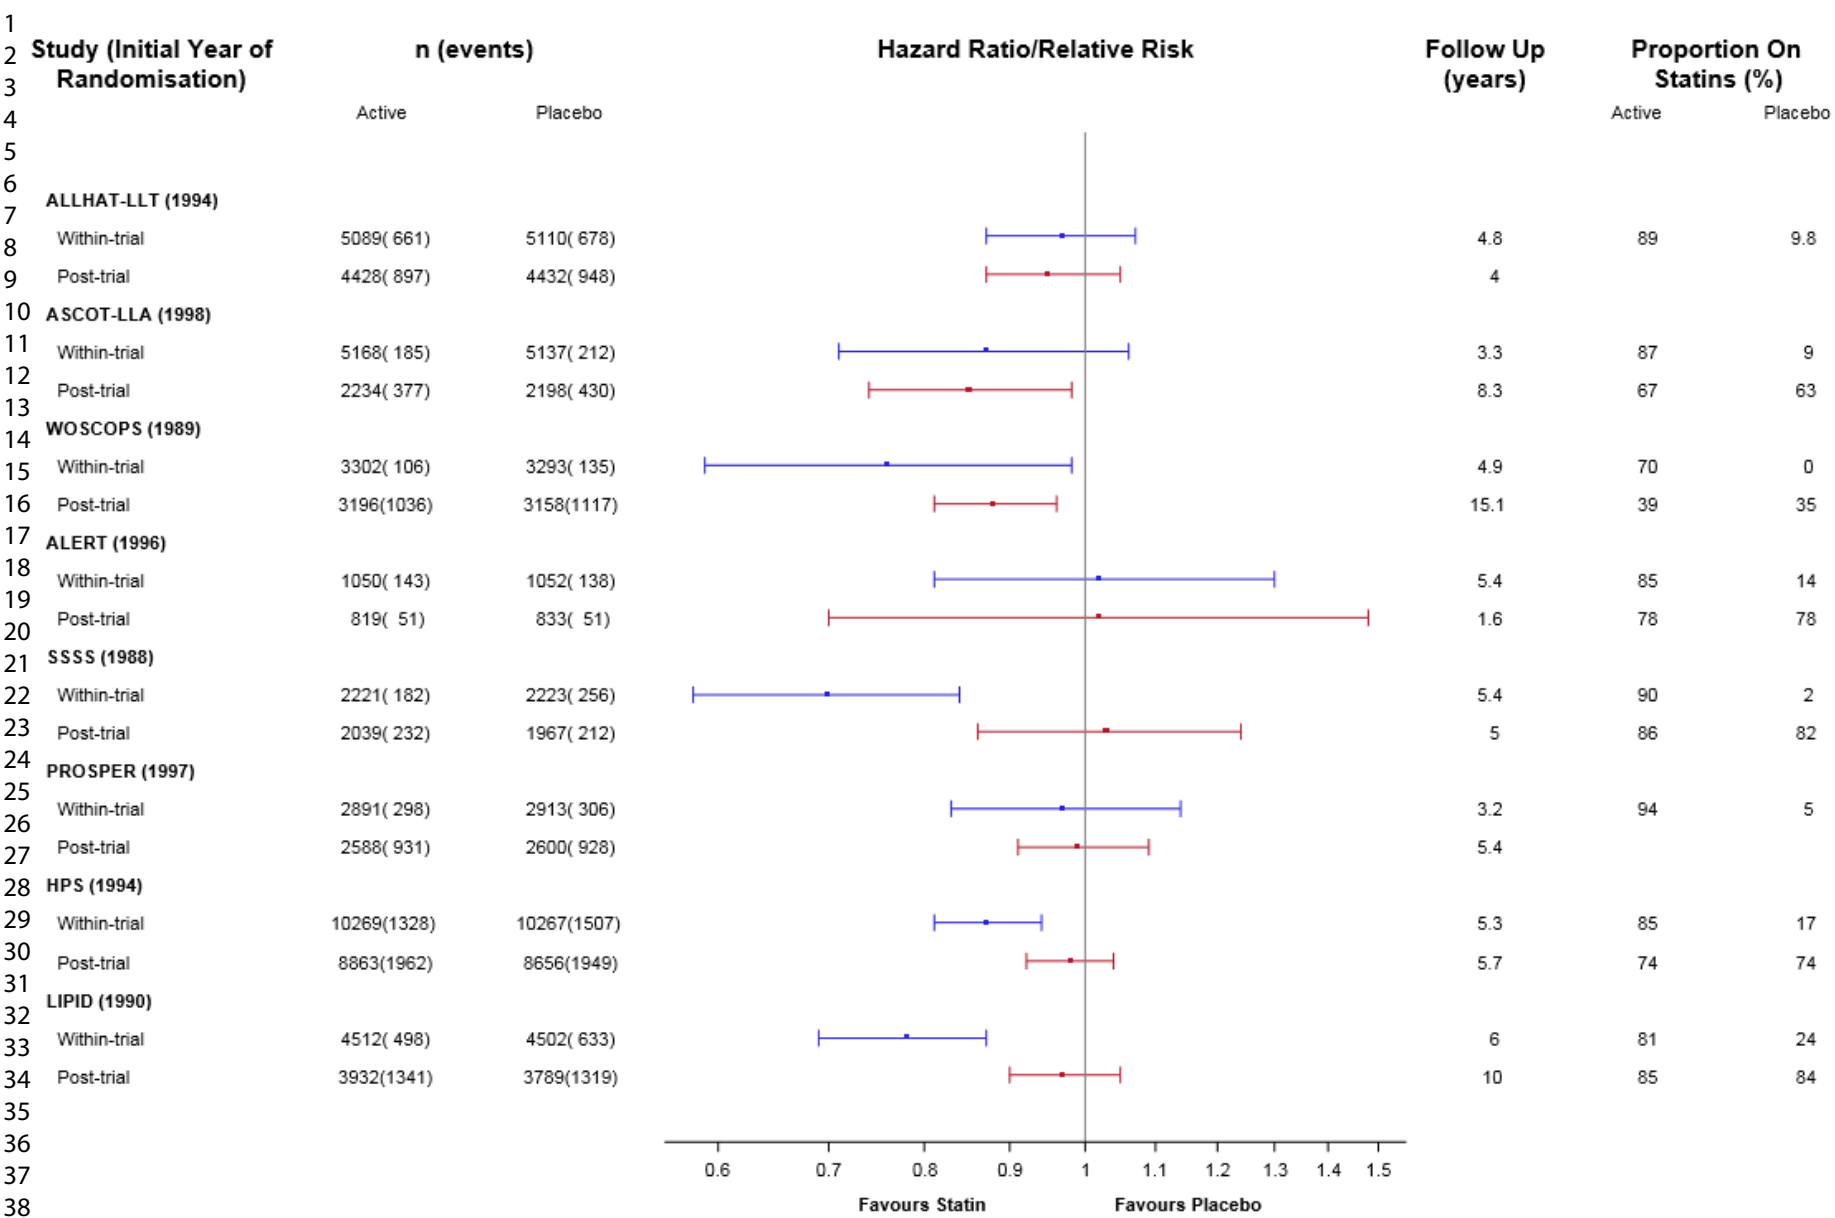

# Fig 3A. Random effects meta-analysis of relative risks for legacy (post-trial) effects of statins on CVD mortality

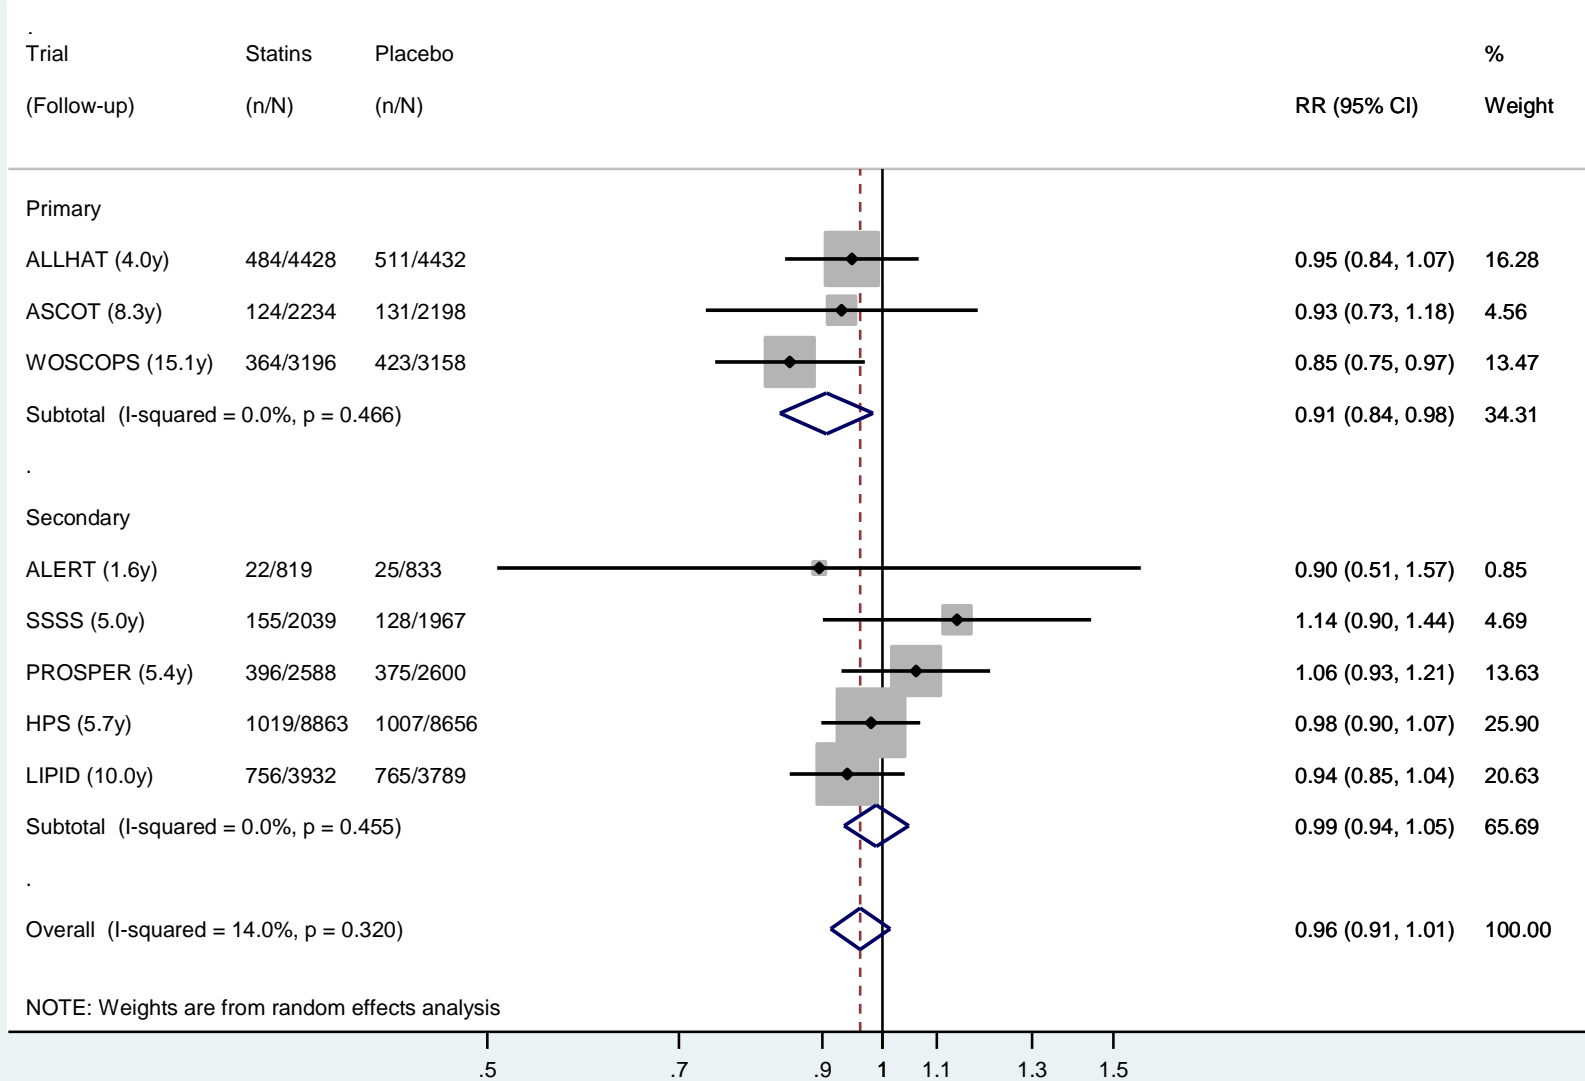

NOTE: Weights are from random effects analysis

Fig 3B. Random effects meta-analysis of relative risks for legacy (post-trial) effects of statins on All cause mortality

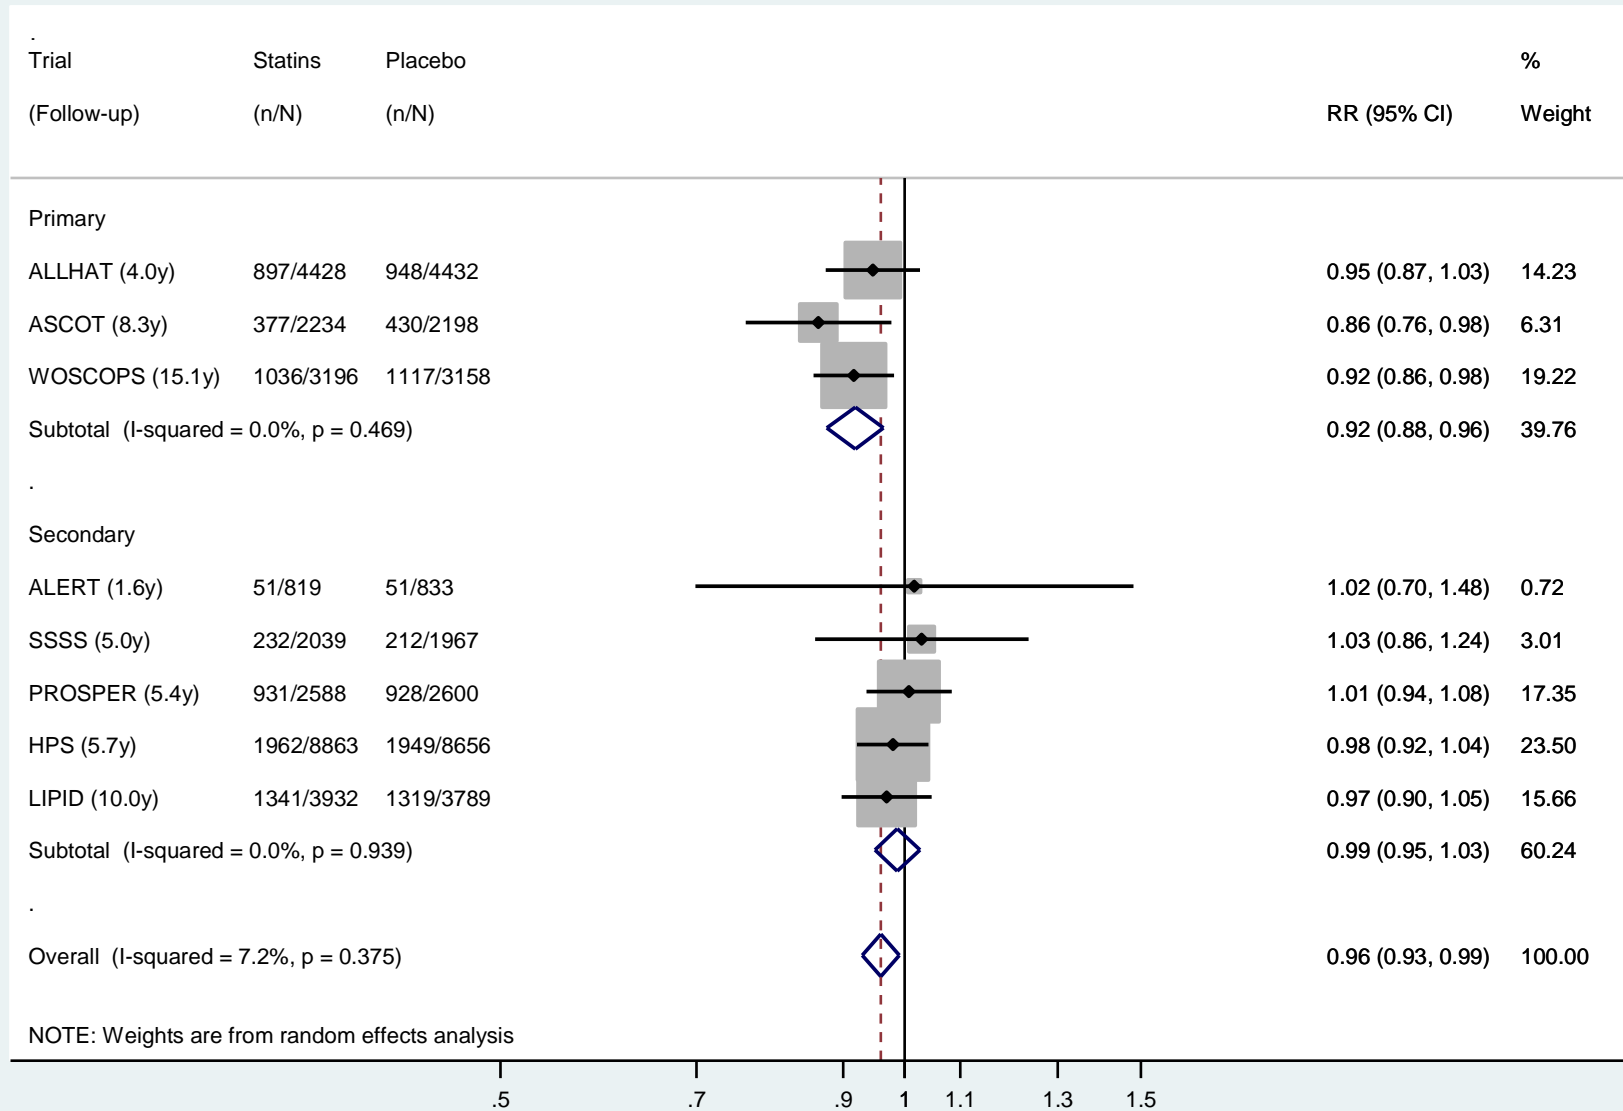

NOTE: Weights are from random effects analysis

# Fig 4A. Random effects meta-analysis of Hazard Ratios for legacy (post-trial) effects of statins on CVD mortality for 4 trials

1  
2  
3  
4  
5  
6  
7  
8  
9  
10  
11  
12  
13  
14  
15  
16  
17  
18  
19  
20  
21  
22  
23  
24  
25  
26  
27  
28  
29  
30  
31  
32  
33  
34  
35  
36  
37  
38  
39  
40  
41

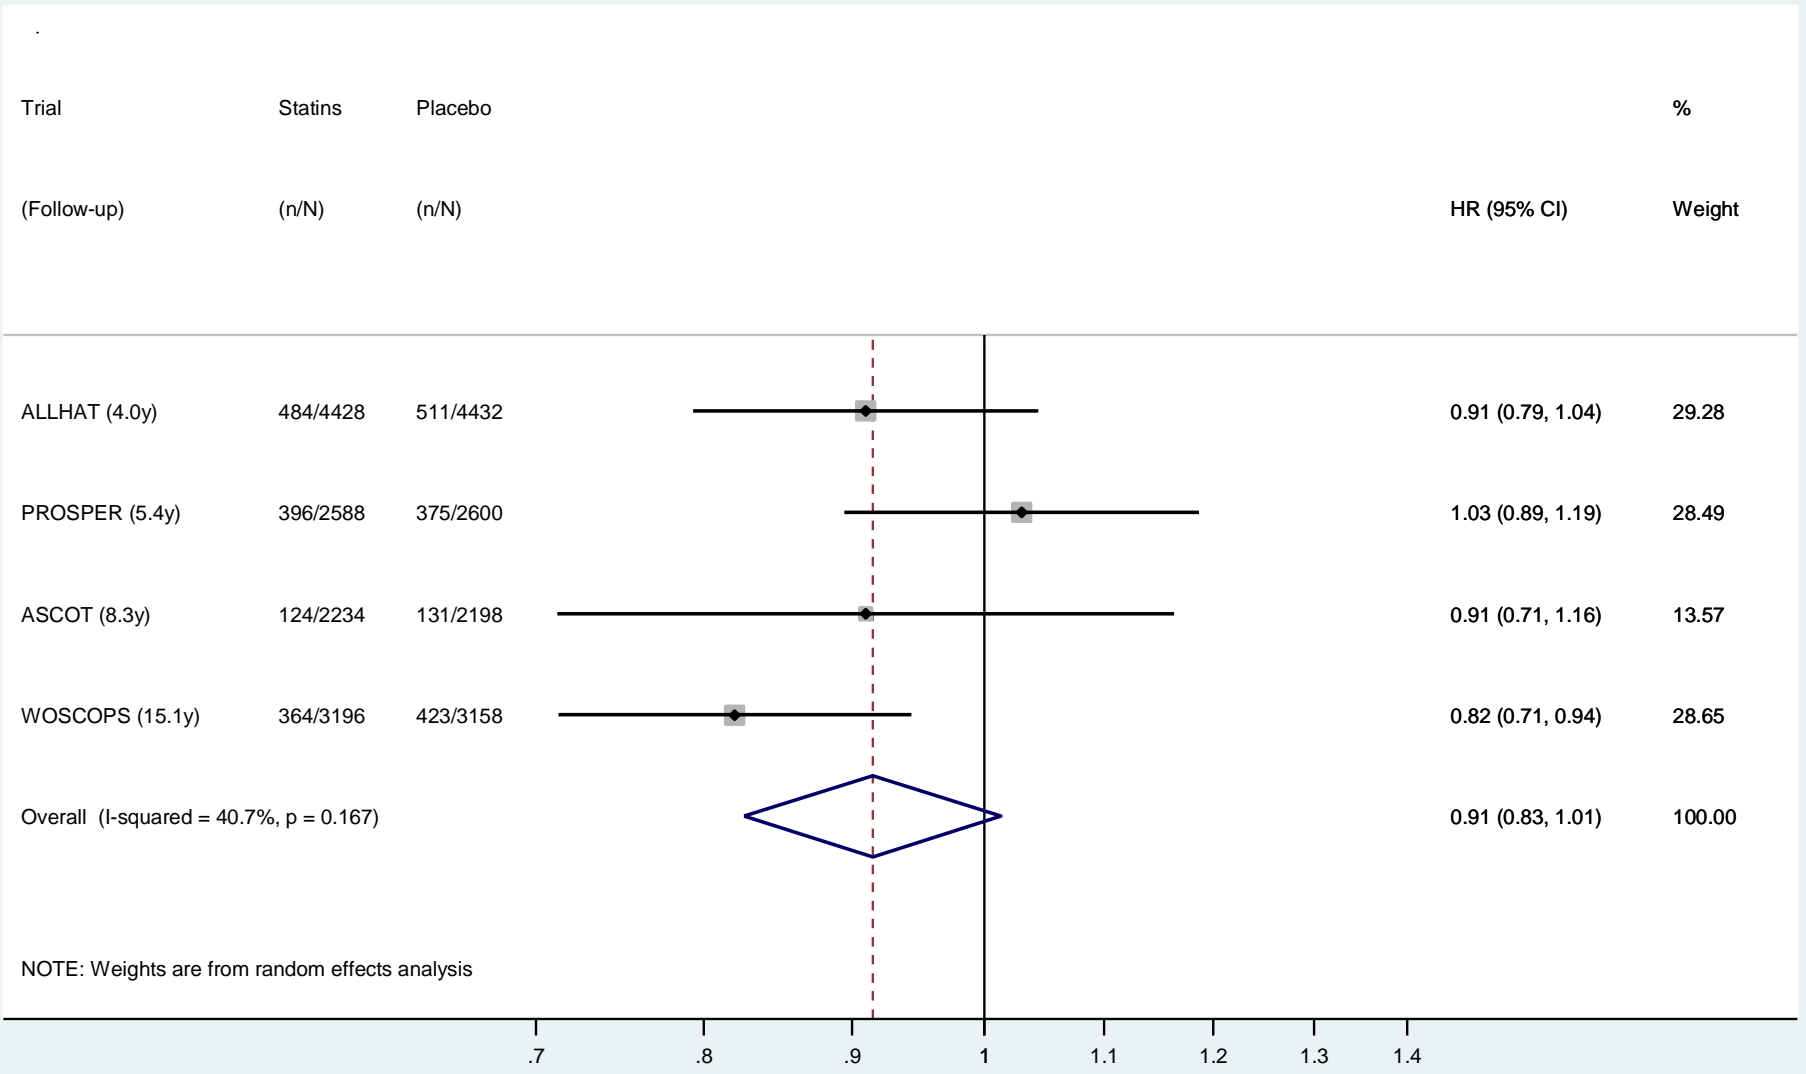

NOTE: Weights are from random effects analysis

# Fig 4B. Random effects meta-analysis of Hazard Ratios for legacy (post-trial) effects of statins on All cause mortality for 4 trials

1  
2  
3  
4  
5  
6  
7  
8  
9  
10  
11  
12  
13  
14  
15  
16  
17  
18  
19  
20  
21  
22  
23  
24  
25  
26  
27  
28  
29  
30  
31  
32  
33  
34  
35  
36  
37  
38  
39  
40  
41

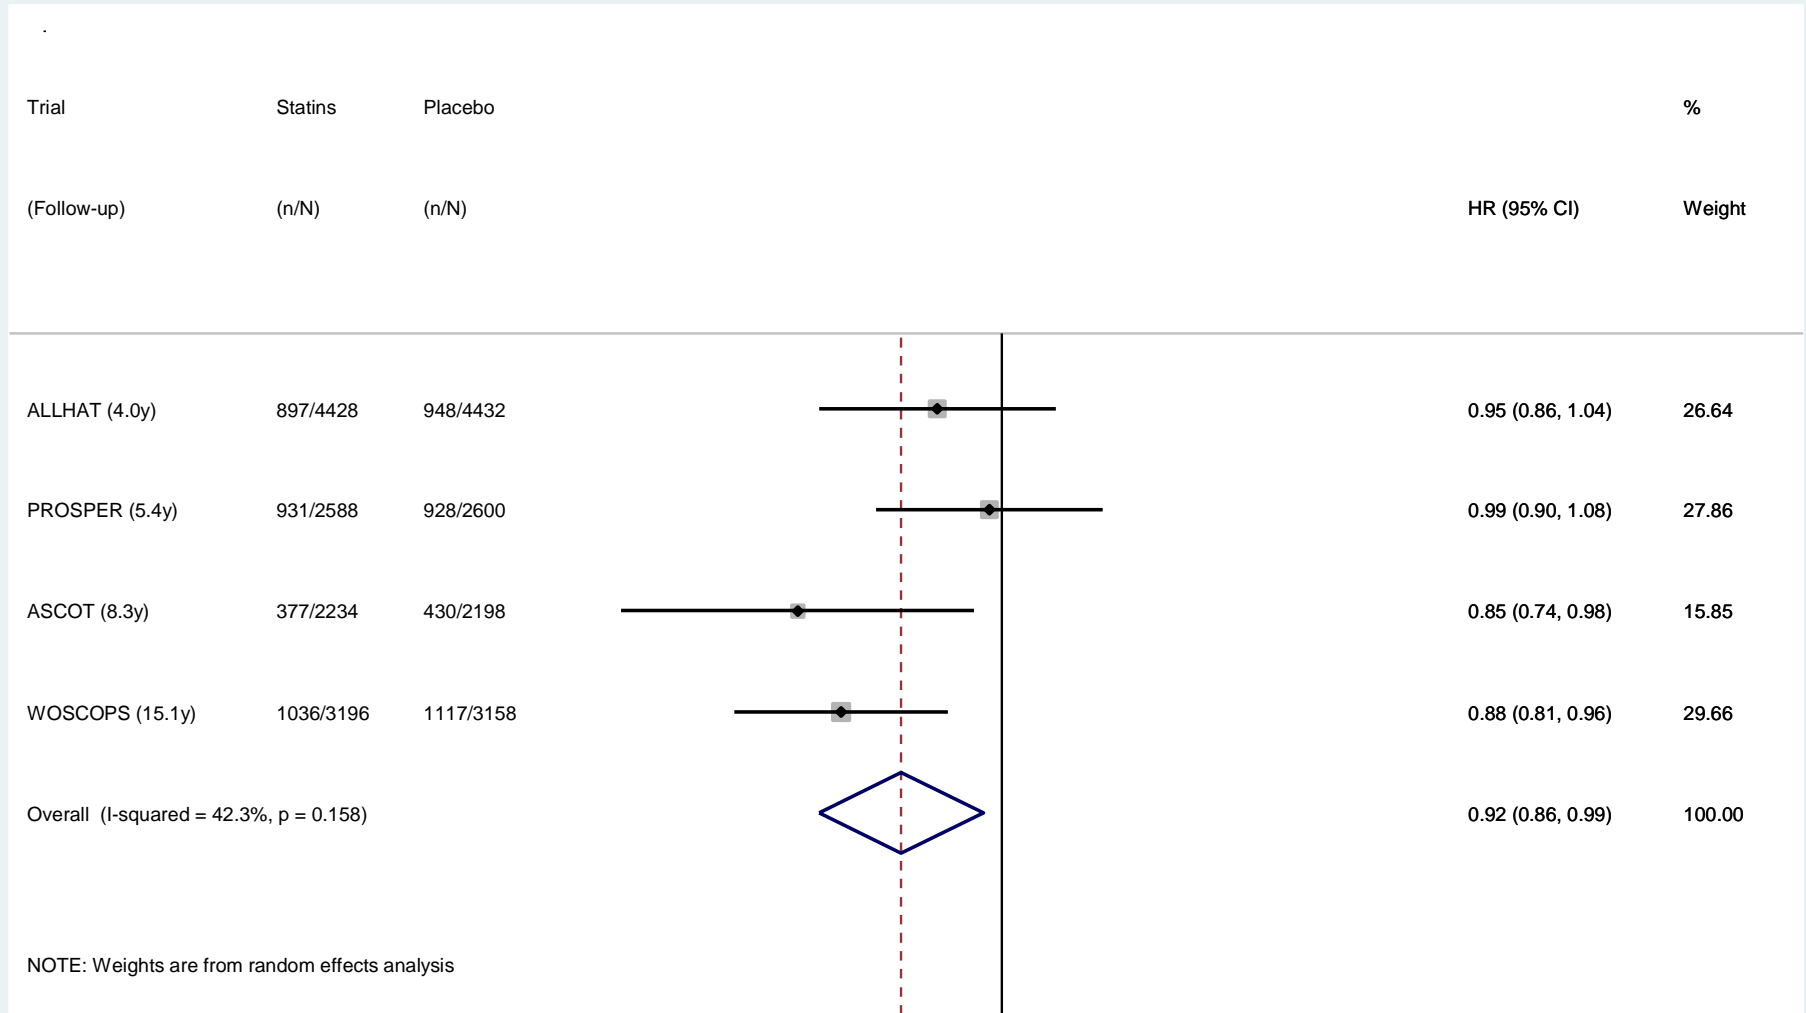

NOTE: Weights are from random effects analysis



# Fig 4C. Random effects meta-analysis of Hazard Ratios for legacy (post-trial) effects of statins on CVD mortality for 3 primary prevention trials

1  
2  
3  
4  
5  
6  
7  
8  
9  
10  
11  
12  
13  
14  
15  
16  
17  
18  
19  
20  
21  
22  
23  
24  
25  
26  
27  
28  
29  
30  
31  
32  
33  
34  
35  
36  
37  
38  
39  
40  
41

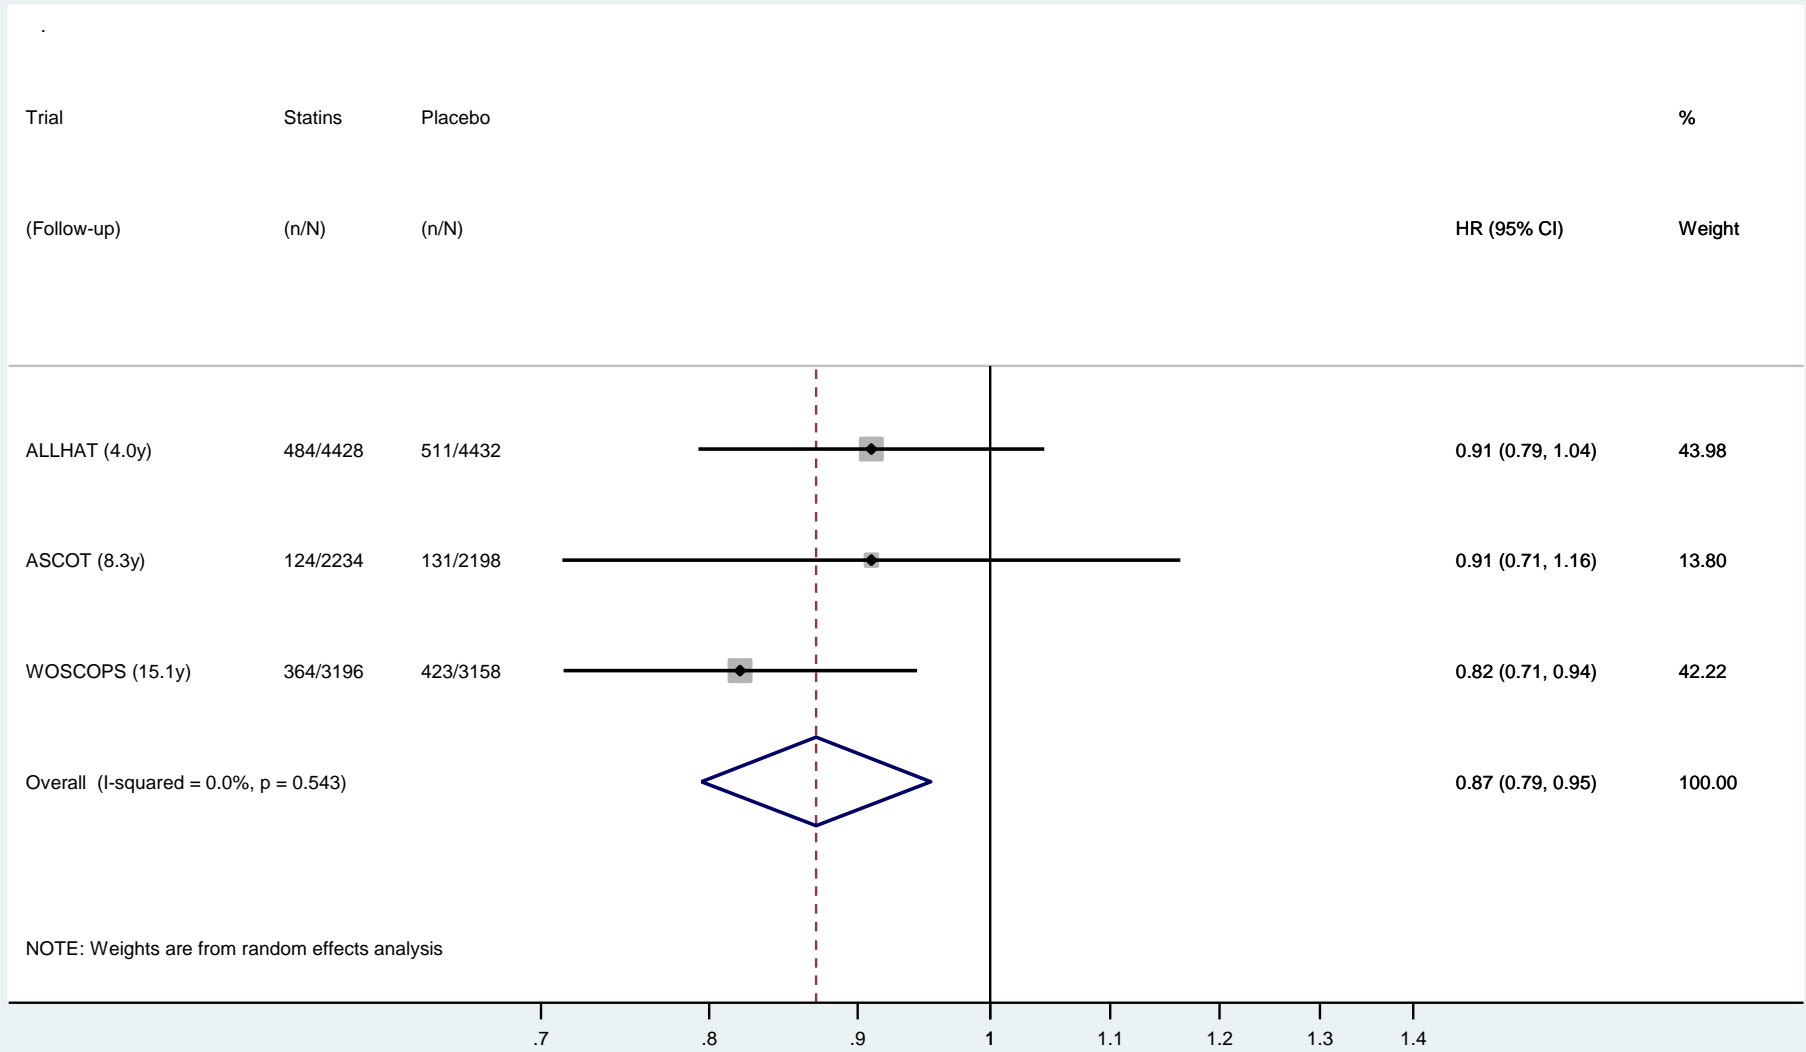

NOTE: Weights are from random effects analysis

Fig 4D. Random effects meta-analysis of Hazard Ratios for legacy (post-trial) effects of statins on All cause mortality for 3 primary prevention trials

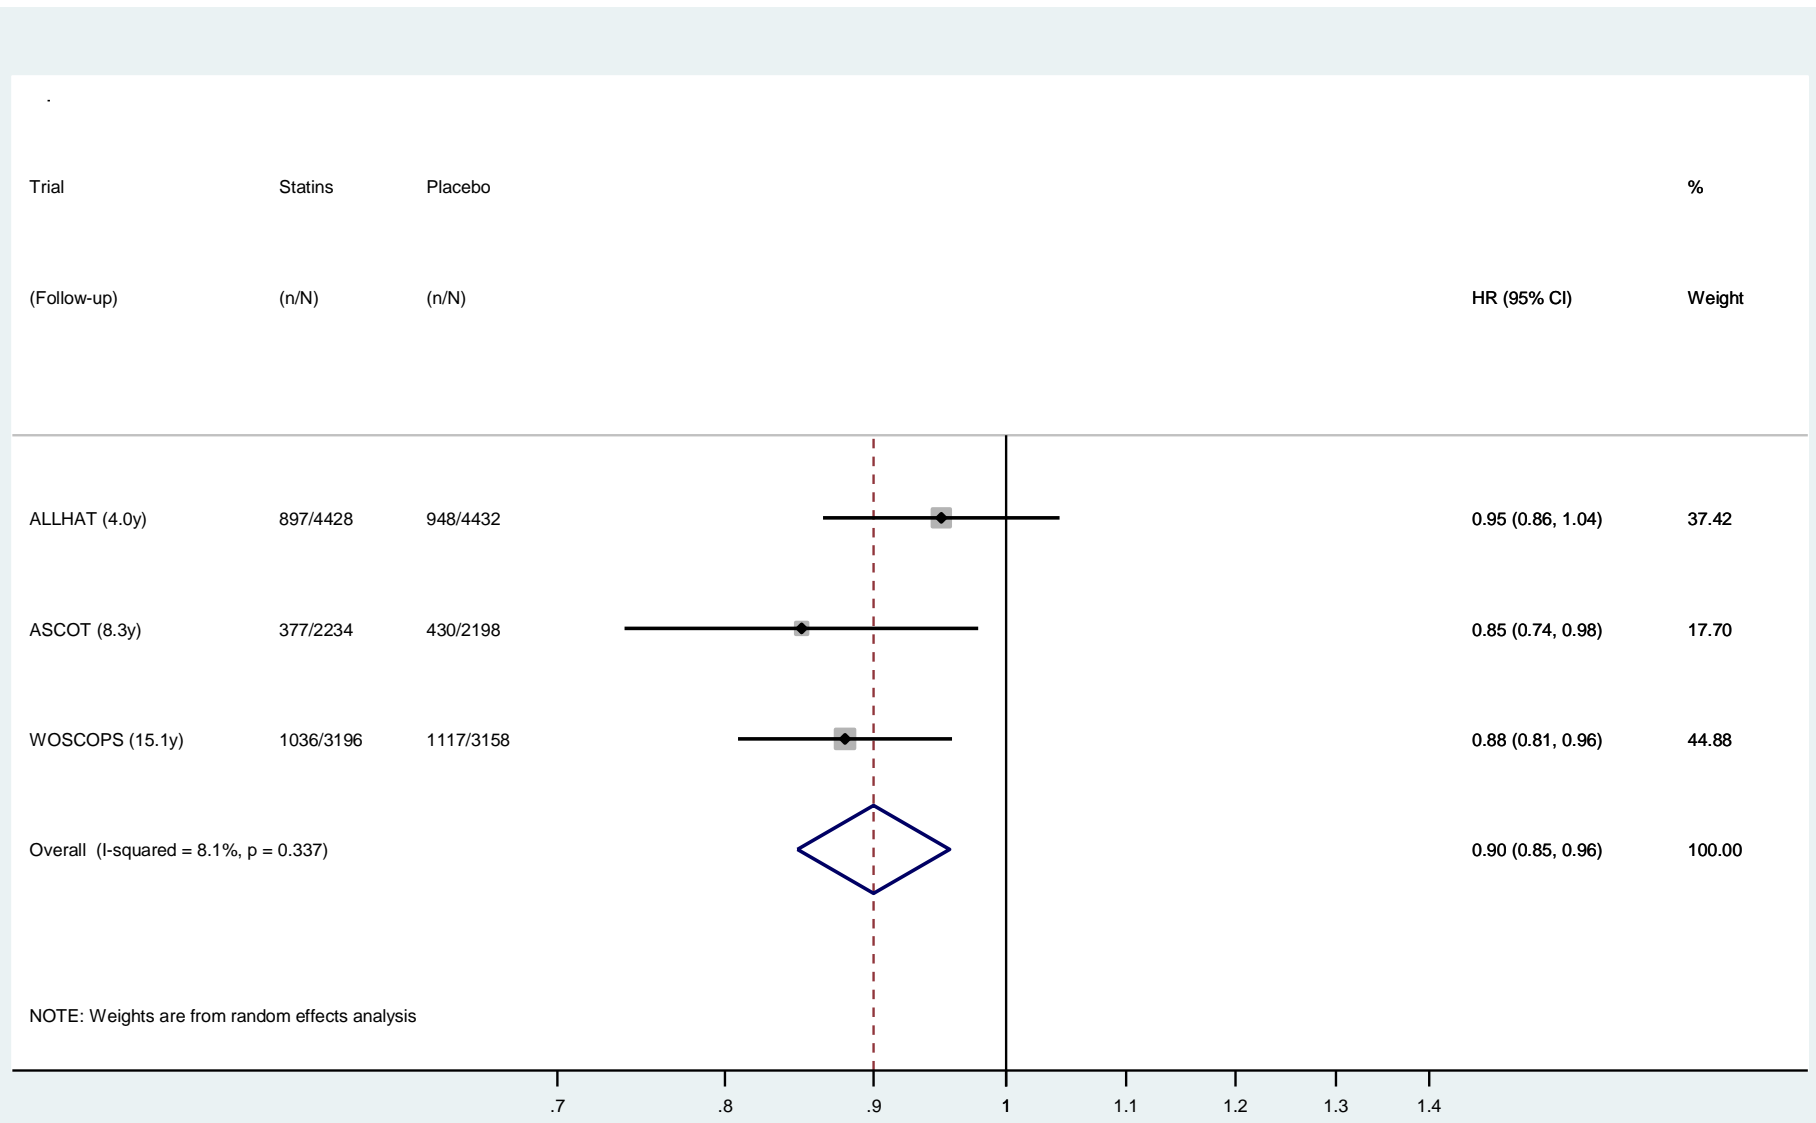

NOTE: Weights are from random effects analysis

1  
2  
3 **1 Simulation**  
4

5 2 We simulated outcomes for 4,000 people with equivalent pre-trial five-year CVD risk estimates for those who  
6 3 were randomized to have a statin or placebo. First, we set our simulation to include 2,000 people with baseline  
7 4 five-year risk of CVD mortality of 5% (high risk group) and 2,000 people with five-year risk of CV mortality of  
8 5 1% (low risk group). Second, within the two risk groups we randomized individuals to statin or placebo at a  
9 6 ratio of 1:1. Third, we applied a relative risk reduction on CVD mortality of 0.80 for individuals randomized to  
10 7 statin for the five years of the trial period. After the trial, survivors in the group randomized to statin returned to  
11 8 their baseline five year risk of CVD mortality, and all individuals were followed until they had an event, up to a  
12 9 further 20 years. For simplicity, we did not include any effects for aging in the model. The simulation was run  
13 10 1000 times in R 3.3.1. Survival and hazard curves were generated by calculating the average results.  
14  
15 11  
16  
17  
18 12  
19  
20  
21  
22  
23  
24  
25  
26  
27  
28  
29  
30  
31  
32  
33  
34  
35  
36  
37  
38  
39  
40  
41  
42  
43  
44  
45  
46  
47  
48  
49  
50  
51  
52  
53  
54  
55  
56  
57  
58  
59  
60

For peer review only

13 **eFigure. Selection of primary studies**

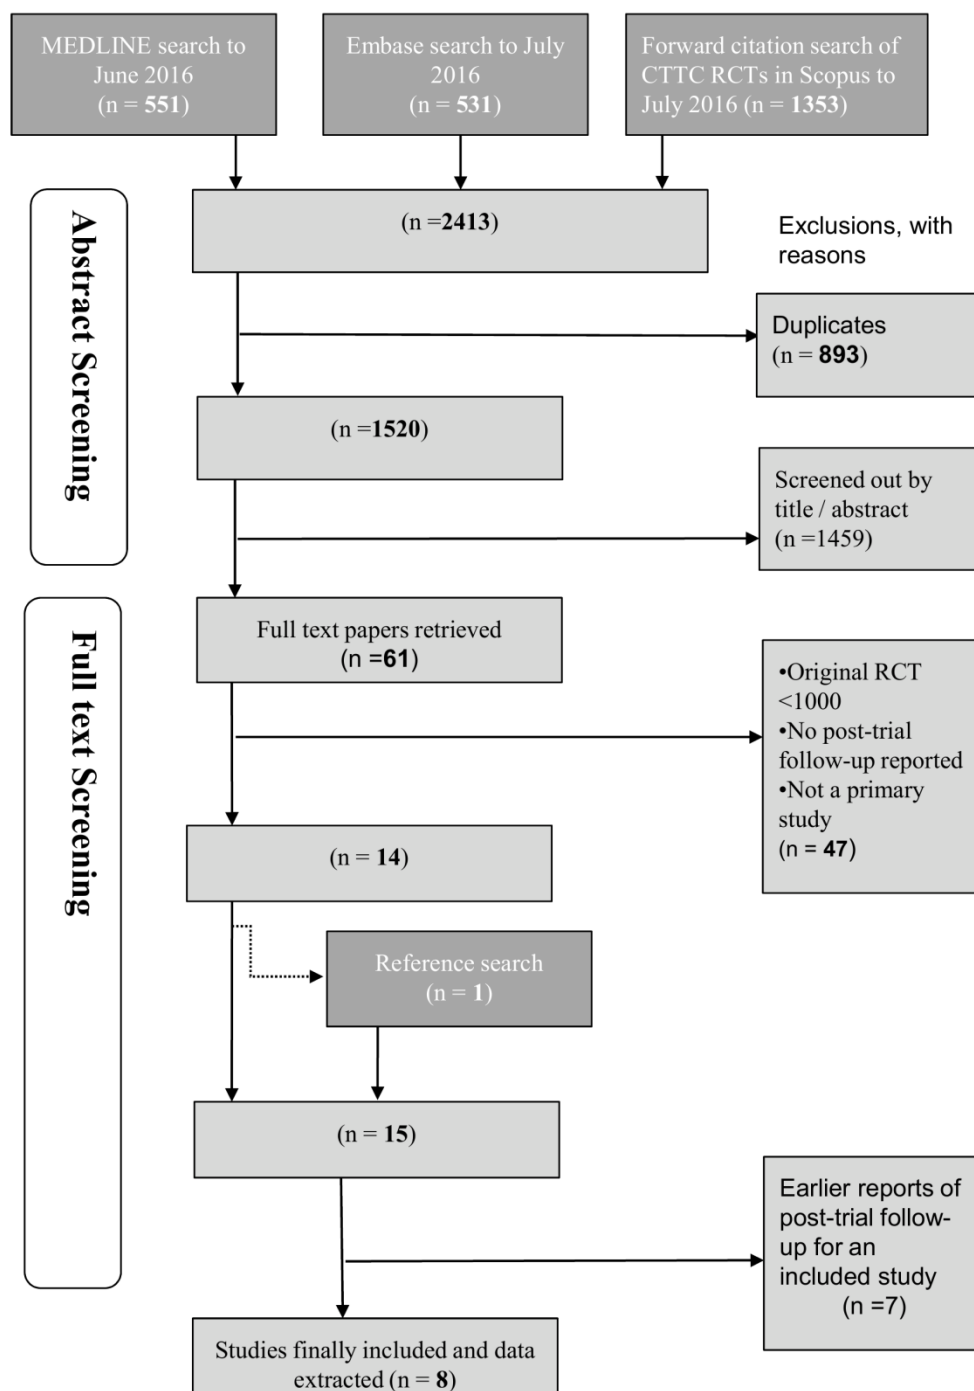

14

15

16 **CTTC = Cholesterol Treatment Trialists' Collaboration**

17 eTable 1. Characteristics of the 8 included studies

| Study                                                  | Target population                                                 | Dates of recruitment | Mean follow-up (years) | Statin            | Number of participants | Proportion of women (%) | Mean age (range, years) | Diabetes (%) | History of CVD (%) | Duration of post-trial follow-up | Difference in proportion taking statins post-trial (%) |
|--------------------------------------------------------|-------------------------------------------------------------------|----------------------|------------------------|-------------------|------------------------|-------------------------|-------------------------|--------------|--------------------|----------------------------------|--------------------------------------------------------|
| <b>Primary Prevention/<br/>Primary care population</b> |                                                                   |                      |                        |                   |                        |                         |                         |              |                    |                                  |                                                        |
| ALLHAT-LLT                                             | Treated for high BP with high cholesterol                         | 1994-1998            | 4.8                    | Pravastatin 40mg  | 10355                  | 49                      | 66 (55-?)               | 35           | 11                 | 4                                | ?                                                      |
| ASCOT-LLA                                              | High BP and no history of CHD, with 3+ other CVD risk factors     | 1998-2000            | 3.2                    | Atorvastatin 10mg | 10305                  | 19                      | 63 (40-79)              | 25           | 14                 | 8.3                              | 4                                                      |
| WOSCOPS                                                | Men with high cholesterol and no history of myocardial infarction | 1989-1991            | 4.8                    | Pravastatin 40mg  | 6595                   | 0                       | 55 (45-64)              | 1            | 8                  | 15.1                             | 4                                                      |
| <b>Secondary Prevention/<br/>Clinical population</b>   |                                                                   |                      |                        |                   |                        |                         |                         |              |                    |                                  |                                                        |

|    |                |                 |       |     |             |       |    |             |    |     |     |   |
|----|----------------|-----------------|-------|-----|-------------|-------|----|-------------|----|-----|-----|---|
| 1  |                |                 |       |     |             |       |    |             |    |     |     |   |
| 2  |                |                 |       |     |             |       |    |             |    |     |     |   |
| 3  | <b>ALERT</b>   | Renal or        | 1996- | 5.1 | Fluvastatin | 2102  | 34 | 50 (30-75)  | 19 | 19  | 1.6 | 0 |
| 4  |                | combined        | 1997  |     | 40mg        |       |    |             |    |     |     |   |
| 5  |                | renal           |       |     |             |       |    |             |    |     |     |   |
| 6  |                | and             |       |     |             |       |    |             |    |     |     |   |
| 7  |                | pancreas        |       |     |             |       |    |             |    |     |     |   |
| 8  |                | transplant      |       |     |             |       |    |             |    |     |     |   |
| 9  |                | recipients at   |       |     |             |       |    |             |    |     |     |   |
| 10 |                | high risk of    |       |     |             |       |    |             |    |     |     |   |
| 11 |                | CVD             |       |     |             |       |    |             |    |     |     |   |
| 12 | <b>SSSS</b>    | History of      | 1988- | 5.2 | Simvastatin | 4444  | 19 | 60+ (35-70) | 5  | 100 | 5   | 4 |
| 13 |                | angina or       | 1989  |     | 20-40mg     |       |    |             |    |     |     |   |
| 14 |                | myocardial      |       |     |             |       |    |             |    |     |     |   |
| 15 |                | infarction      |       |     |             |       |    |             |    |     |     |   |
| 16 | <b>PROSPER</b> | ≥70 years       | 1997- | 3.2 | Pravastatin | 5804  | 52 | 75 (70-82)  | 11 | 44  | 5.4 | ? |
| 17 |                | with history    | 1999  |     | 40mg        |       |    |             |    |     |     |   |
| 18 |                | of CVD          |       |     |             |       |    |             |    |     |     |   |
| 19 |                | or at high risk |       |     |             |       |    |             |    |     |     |   |
| 20 |                | of CVD          |       |     |             |       |    |             |    |     |     |   |
| 21 | <b>HPS</b>     | Coronary        | 1994- | 5.0 | Simvastatin | 20536 | 25 | 64 (40-80)  | 29 | 85  | 5.7 | 0 |
| 22 |                | disease,        | 1997  |     | 40mg        |       |    |             |    |     |     |   |
| 23 |                | other           |       |     |             |       |    |             |    |     |     |   |
| 24 |                | occlusive       |       |     |             |       |    |             |    |     |     |   |
| 25 |                | arterial        |       |     |             |       |    |             |    |     |     |   |
| 26 |                | disease,        |       |     |             |       |    |             |    |     |     |   |
| 27 |                | diabetes or     |       |     |             |       |    |             |    |     |     |   |
| 28 |                | treated for     |       |     |             |       |    |             |    |     |     |   |
| 29 |                | high BP         |       |     |             |       |    |             |    |     |     |   |
| 30 | <b>LIPID</b>   | Myocardial      | 1990- | 5.6 | Pravastatin | 9014  | 17 | 62 (31-75)  | 9  | >99 | 10  | 1 |
| 31 |                | infarction or   | 1992  |     | 40mg        |       |    |             |    |     |     |   |
| 32 |                | hospitalizatio  |       |     |             |       |    |             |    |     |     |   |
| 33 |                | n               |       |     |             |       |    |             |    |     |     |   |
| 34 |                | for unstable    |       |     |             |       |    |             |    |     |     |   |
| 35 |                | angina          |       |     |             |       |    |             |    |     |     |   |

18

**Notes**

1. CVD = Cardiovascular Disease
2. Order of trials within primary prevention and secondary prevention order is from shortest post-trial follow-up to longest.

eTable 2 Effect of treatment allocation on All-cause mortality and CVD-mortality reported within trial period

| Study      | Difference in proportion taking statins within-trial (%) <sup>1</sup> | Allocated to statins |            |            | Allocated to placebo |            |            | Risk Estimates                      |                                     |
|------------|-----------------------------------------------------------------------|----------------------|------------|------------|----------------------|------------|------------|-------------------------------------|-------------------------------------|
|            |                                                                       | N                    | All deaths | CVD deaths | N                    | All deaths | CVD deaths | All deaths                          | CVD deaths                          |
| ALLHAT-LLT | 79                                                                    | 5089                 | 661        | 529        | 5110                 | 678        | 546        | 0.97 (0.87-1.07) <sup>2</sup>       | 0.96 (0.83-1.13) <sup>2</sup>       |
| ASCOT-LLA  | 78                                                                    | 5168                 | 460        | 154        | 5137                 | 520        | 167        | 0.87 (0.71-1.06) <sup>2</sup>       | 0.90 (0.66-1.23) <sup>2</sup>       |
| WOS-COPS   | 70                                                                    | 3302                 | 106        | 49         | 3293                 | 135        | 71         | <b>0.76 (0.59-0.98)<sup>2</sup></b> | <b>0.66 (0.46-0.95)<sup>2</sup></b> |
| ALERT      | 71                                                                    | 1050                 | 143        | 66         | 1052                 | 138        | 73         | 1.02 (0.81-1.30) <sup>3</sup>       | <b>0.62 (0.40-0.96)<sup>3</sup></b> |
| SSSS       | 88                                                                    | 2221                 | 182        | 136        | 2223                 | 256        | 207        | <b>0.70 (0.58-0.84)<sup>3</sup></b> | <b>0.64 (0.52-0.80)<sup>3</sup></b> |
| PROSPER    | 89                                                                    | 2891                 | 298        | 122        | 2913                 | 306        | 154        | 0.97 (0.83-1.14) <sup>2</sup>       | <b>0.77 (0.61-0.98)<sup>2</sup></b> |
| HPS        | 68                                                                    | 10269                | 1328       | 826        | 10267                | 1507       | 998        | <b>0.87(0.81-0.94)<sup>3</sup></b>  | <b>0.82 (0.75-0.90)<sup>3</sup></b> |
| LIPID      | 57                                                                    | 4512                 | 498        | 331        | 4502                 | 633        | 433        | <b>0.77 (0.69-0.87)<sup>3</sup></b> | <b>0.75 (0.65-0.87)<sup>3</sup></b> |

24

## Notes

1. Difference in % taking statins = [% taking statins in group allocated to statin in trial - % taking statins in group allocated to placebo in trial]
2. Studies reporting Hazard Ratio
3. Studies reporting Relative Risk
4. Statistically significant results are **bolded**
5. CVD = Cardiovascular Disease
6. Order of trials within primary prevention and secondary prevention is from shortest post-trial follow-up to longest.

32

33 eTable 3 Effect of treatment allocation on All-cause mortality and CVD-mortality reported for post-trial period

| Study      | Average post-trial follow-up | Difference in proportion taking statins post-trial (%) <sup>1</sup> | Allocated to statins |            |            | Allocated to placebo |            |            | Risk Ratio                          |                                     |
|------------|------------------------------|---------------------------------------------------------------------|----------------------|------------|------------|----------------------|------------|------------|-------------------------------------|-------------------------------------|
|            |                              |                                                                     | N <sup>4</sup>       | All deaths | CVD deaths | N <sup>4</sup>       | All deaths | CVD deaths | All deaths                          | CVD deaths                          |
| ALLHAT-LLT | 4                            | ?                                                                   | 4428                 | 897        | 484        | 4432                 | 948        | 511        | 0.91 (0.79–1.04) <sup>2</sup>       | 0.95 (0.87-1.05) <sup>2</sup>       |
| ASCOT-LLA  | 8.3                          | 4                                                                   | 2234                 | 377        | 124        | 2198                 | 430        | 131        | <b>0.85 (0.74-0.98)<sup>2</sup></b> | 0.91 (0.71-1.16) <sup>2</sup>       |
| WOS-COPS   | 15.1                         | 4                                                                   | 3196                 | 1036       | 364        | 3158                 | 1117       | 423        | <b>0.88 (0.81-0.96)<sup>2</sup></b> | <b>0.82 (0.71-0.94)<sup>3</sup></b> |
| ALERT      | 1.6                          | 0                                                                   | 811                  | 51         | 22         | 820                  | 51         | 25         | 1.01 (0.69 - 1.47) <sup>3</sup>     | 0.89 (0.51 - 1.56) <sup>3</sup>     |
| SSSS       | 5                            | 4                                                                   | 2039                 | 232        | 155        | 1967                 | 212        | 128        | 1.03 (0.86-1.24) <sup>3</sup>       | 1.14 (0.90-1.44) <sup>3</sup>       |
| PROSPER    | 5.4                          | ?                                                                   | 2588                 | 931        | 396        | 2600                 | 928        | 375        | 0.99 (0.91-1.09) <sup>2</sup>       | 1.03 (0.89-1.18) <sup>2</sup>       |
| HPS        | 5.7                          | 0                                                                   | 8863                 | 1962       | 1019       | 8656                 | 1949       | 1007       | 0.98 (0.90-1.07) <sup>3</sup>       | 0.98 (0.92-1.04) <sup>3</sup>       |
| LIPID      | 10                           | 1                                                                   | 3932                 | 1341       | 756        | 3789                 | 1319       | 765        | 0.97 (0.90-1.05) <sup>3</sup>       | 0.94 (0.85-1.04) <sup>3</sup>       |

34

## 35 Notes

- 36 1. Difference in % taking statins = [% taking statins in group allocated to statin in trial - % taking statins in group allocated to placebo in trial]
- 37 2. Studies reporting Hazard Ratio
- 38 3. Studies reporting Relative Risk
- 39 4. Number alive and followed post-trial
- 40 5. Statistically significant results are **bolded**
- 41 6. CVD = Cardiovascular Disease
- 42 7. Order of trials within primary prevention and secondary prevention is from shortest post-trial follow-up to longest



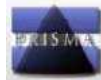

# PRISMA 2009 Checklist

| Section/topic                      | #  | Checklist item                                                                                                                                                                                                                                                                                              | Reported on page # |
|------------------------------------|----|-------------------------------------------------------------------------------------------------------------------------------------------------------------------------------------------------------------------------------------------------------------------------------------------------------------|--------------------|
| <b>TITLE</b>                       |    |                                                                                                                                                                                                                                                                                                             |                    |
| Title                              | 1  | Identify the report as a systematic review, meta-analysis, or both.                                                                                                                                                                                                                                         | 1                  |
| <b>ABSTRACT</b>                    |    |                                                                                                                                                                                                                                                                                                             |                    |
| Structured summary                 | 2  | Provide a structured summary including, as applicable: background; objectives; data sources; study eligibility criteria, participants, and interventions; study appraisal and synthesis methods; results; limitations; conclusions and implications of key findings; systematic review registration number. | 3-4                |
| <b>INTRODUCTION</b>                |    |                                                                                                                                                                                                                                                                                                             |                    |
| Rationale                          | 3  | Describe the rationale for the review in the context of what is already known.                                                                                                                                                                                                                              | 5-6                |
| Objectives                         | 4  | Provide an explicit statement of questions being addressed with reference to participants, interventions, comparisons, outcomes, and study design (PICOS).                                                                                                                                                  | 6                  |
| <b>METHODS</b>                     |    |                                                                                                                                                                                                                                                                                                             |                    |
| Protocol and registration          | 5  | Indicate if a review protocol exists, if and where it can be accessed (e.g., Web address), and, if available, provide registration information including registration number.                                                                                                                               | 6                  |
| Eligibility criteria               | 6  | Specify study characteristics (e.g., PICOS, length of follow-up) and report characteristics (e.g., years considered, language, publication status) used as criteria for eligibility, giving rationale.                                                                                                      | 6                  |
| Information sources                | 7  | Describe all information sources (e.g., databases with dates of coverage, contact with study authors to identify additional studies) in the search and date last searched.                                                                                                                                  | 6-7                |
| Search                             | 8  | Present full electronic search strategy for at least one database, including any limits used, such that it could be repeated.                                                                                                                                                                               | 7 (Box 1)          |
| Study selection                    | 9  | State the process for selecting studies (i.e., screening, eligibility, included in systematic review, and, if applicable, included in the meta-analysis).                                                                                                                                                   | 7-8                |
| Data collection process            | 10 | Describe method of data extraction from reports (e.g., piloted forms, independently, in duplicate) and any processes for obtaining and confirming data from investigators.                                                                                                                                  | 7                  |
| Data items                         | 11 | List and define all variables for which data were sought (e.g., PICOS, funding sources) and any assumptions and simplifications made.                                                                                                                                                                       | 7-8                |
| Risk of bias in individual studies | 12 | Describe methods used for assessing risk of bias of individual studies (including specification of whether this was done at the study or outcome level), and how this information is to be used in any data synthesis.                                                                                      | 7                  |
| Summary measures                   | 13 | State the principal summary measures (e.g., risk ratio, difference in means).                                                                                                                                                                                                                               | 8                  |
| Synthesis of results               | 14 | Describe the methods of handling data and combining results of studies, if done, including measures of consistency (e.g., $I^2$ ) for each meta-analysis.                                                                                                                                                   | 8                  |

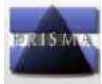

# PRISMA 2009 Checklist

Page 1 of 2

| Section/topic                 | #  | Checklist item                                                                                                                                                                                                                                                                       | Reported on page #              |
|-------------------------------|----|--------------------------------------------------------------------------------------------------------------------------------------------------------------------------------------------------------------------------------------------------------------------------------------|---------------------------------|
| Risk of bias across studies   | 15 | Specify any assessment of risk of bias that may affect the cumulative evidence (e.g., publication bias, selective reporting within studies).                                                                                                                                         | -                               |
| Additional analyses           | 16 | Describe methods of additional analyses (e.g., sensitivity or subgroup analyses, meta-regression), if done, indicating which were pre-specified.                                                                                                                                     | 8                               |
| <b>RESULTS</b>                |    |                                                                                                                                                                                                                                                                                      |                                 |
| Study selection               | 17 | Give numbers of studies screened, assessed for eligibility, and included in the review, with reasons for exclusions at each stage, ideally with a flow diagram.                                                                                                                      | eFigure                         |
| Study characteristics         | 18 | For each study, present characteristics for which data were extracted (e.g., study size, PICOS, follow-up period) and provide the citations.                                                                                                                                         | eTable 1                        |
| Risk of bias within studies   | 19 | Present data on risk of bias of each study and, if available, any outcome level assessment (see item 12).                                                                                                                                                                            | eTable 1                        |
| Results of individual studies | 20 | For all outcomes considered (benefits or harms), present, for each study: (a) simple summary data for each intervention group (b) effect estimates and confidence intervals, ideally with a forest plot.                                                                             | 9-10<br>eTables 2-3<br>Figure 2 |
| Synthesis of results          | 21 | Present results of each meta-analysis done, including confidence intervals and measures of consistency.                                                                                                                                                                              | 11<br>Figures 3-4               |
| Risk of bias across studies   | 22 | Present results of any assessment of risk of bias across studies (see Item 15).                                                                                                                                                                                                      | -                               |
| Additional analysis           | 23 | Give results of additional analyses, if done (e.g., sensitivity or subgroup analyses, meta-regression [see Item 16]).                                                                                                                                                                | 9<br>Figures 3A, 3B, 4C,4D      |
| <b>DISCUSSION</b>             |    |                                                                                                                                                                                                                                                                                      |                                 |
| Summary of evidence           | 24 | Summarize the main findings including the strength of evidence for each main outcome; consider their relevance to key groups (e.g., healthcare providers, users, and policy makers).                                                                                                 | 12                              |
| Limitations                   | 25 | Discuss limitations at study and outcome level (e.g., risk of bias), and at review-level (e.g., incomplete retrieval of identified research, reporting bias).                                                                                                                        | 13                              |
| Conclusions                   | 26 | Provide a general interpretation of the results in the context of other evidence, and implications for future research.<br><small>For peer review only - <a href="http://bmjopen.bmj.com/site/about/guidelines.xhtml">http://bmjopen.bmj.com/site/about/guidelines.xhtml</a></small> | 14-16                           |

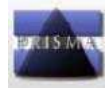

# PRISMA 2009 Checklist

1  
2  
3  
4  
5  
6  
7  
8  
9  
10  
11  
12  
13  
14  
15  
16  
17  
18  
19  
20  
21  
22  
23  
24  
25  
26  
27  
28  
29  
30  
31  
32  
33  
34  
35  
36  
37  
38  
39  
40  
41  
42  
43  
44  
45  
46  
47

|                |    |                                                                                                                                            |   |
|----------------|----|--------------------------------------------------------------------------------------------------------------------------------------------|---|
| <b>FUNDING</b> |    |                                                                                                                                            |   |
| Funding        | 27 | Describe sources of funding for the systematic review and other support (e.g., supply of data); role of funders for the systematic review. | 1 |

From: Moher D, Liberati A, Tetzlaff J, Altman DG, The PRISMA Group (2009). Preferred Reporting Items for Systematic Reviews and Meta-Analyses: The PRISMA Statement. PLoS Med 6(7): e1000097. doi:10.1371/journal.pmed1000097

For more information, visit: [www.prisma-statement.org](http://www.prisma-statement.org).

For peer review only

# BMJ Open

## Legacy effects of statins on cardiovascular and all-cause mortality - A meta-analysis

|                                 |                                                                                                                                                                                                                                                                                                                                                                                                                                                                |
|---------------------------------|----------------------------------------------------------------------------------------------------------------------------------------------------------------------------------------------------------------------------------------------------------------------------------------------------------------------------------------------------------------------------------------------------------------------------------------------------------------|
| Journal:                        | <i>BMJ Open</i>                                                                                                                                                                                                                                                                                                                                                                                                                                                |
| Manuscript ID                   | bmjopen-2017-020584.R1                                                                                                                                                                                                                                                                                                                                                                                                                                         |
| Article Type:                   | Research                                                                                                                                                                                                                                                                                                                                                                                                                                                       |
| Date Submitted by the Author:   | 18-May-2018                                                                                                                                                                                                                                                                                                                                                                                                                                                    |
| Complete List of Authors:       | Nayak, Agnish; University of New South Wales , UNSW Medical School<br>Hayen, Andrew; UTS<br>Zhu, Lin; UTS<br>McGeechan, Kevin; The University of Sydney, School of Public Health<br>Glasziou, Paul; Bond University, CREBP<br>Irwig, Les; University of Sydney, School of Public Health<br>Doust, Jenny; Bond University, CREBP<br>Gregory, Gabriel ; University of Sydney, Sydney Medical School<br>Bell, Katy; University of Sydney, School of Public Health |
| <b>Primary Subject Heading</b>: | Cardiovascular medicine                                                                                                                                                                                                                                                                                                                                                                                                                                        |
| Secondary Subject Heading:      | Cardiovascular medicine, Evidence based practice                                                                                                                                                                                                                                                                                                                                                                                                               |
| Keywords:                       | Hydroxymethylglutaryl-CoA Reductase Inhibitors, Cholesterol, Early Diagnosis, Randomised Controlled Trial, Follow-up Studies, Meta-Analysis                                                                                                                                                                                                                                                                                                                    |
|                                 |                                                                                                                                                                                                                                                                                                                                                                                                                                                                |

SCHOLARONE™  
Manuscripts

1  
2  
3 **1 Legacy effects of statins on cardiovascular and all-cause mortality**

4  
5  
6 **2 - A meta-analysis**

7  
8  
9 **3 Authors:**

10  
11  
12 4 Agnish Nayak<sup>a</sup>,

13  
14  
15 5 Andrew Hayen<sup>b</sup>, PhD

16  
17  
18 6 Lin Zhu<sup>b</sup>, MPH

19  
20  
21 7 Kevin McGeechan<sup>c</sup>, PhD

22  
23  
24 8 Paul Glasziou<sup>d</sup>, PhD

25  
26  
27 9 Les Irwig<sup>c</sup>, PhD

28  
29  
30 10 Jenny Doust<sup>d</sup>, PhD

31  
32  
33 11 Gabriel Gregory<sup>e</sup>,

34  
35  
36 12 Katy Bell<sup>c</sup>, PhD

37  
38 **13 Text word count:** 3218 words

39  
40  
41 **14 Affiliations:**

42  
43  
44 15 a. UNSW Medical School, University of New South Wales, Sydney, NSW, Australia

45  
46  
47 16 b. Australian Centre for Public and Population Health Research, University of Technology

48  
49  
50 17 Sydney, Sydney, NSW, Australia

51  
52  
53 18 c. School Of Public Health, The University of Sydney, Sydney, NSW, Australia

1  
2  
3 19 d. Centre for Research in Evidence Based Practice, Bond University, Gold Coast, QLD,  
4  
5 20 Australia

6  
7  
8 21 e. Sydney Medical School, The University of Sydney, Sydney, NSW, Australia

9  
10  
11 22 **Address for correspondence:** Dr Katy Bell, Sydney School of Public Health, The University  
12  
13 23 of Sydney, Sydney NSW 2006, Australia. Telephone Number +61415764321.

14  
15 24 [katy.bell@sydney.edu.au](mailto:katy.bell@sydney.edu.au)

16  
17  
18 25

1  
2  
3 26 **ABSTRACT**  
4

5  
6 27 **Objectives:** To assess evidence for “legacy” (post-trial) effects on cardiovascular (CVD) and  
7  
8 28 all-cause mortality among adult participants of placebo controlled randomised trials (RCTs)  
9  
10 29 of statins.

11  
12 30 **Design:** Meta-analysis of aggregate data  
13

14 31 **Setting/Participants:** placebo controlled statin RCTS for primary and secondary CVD  
15  
16 32 prevention  
17

18 33 **Methods:** Data Sources: PubMed, Embase from inception and forward citations of  
19  
20 34 Cholesterol Treatment Trialists’ Collaborators RCTs to 16th June 2016.  
21  
22

23 35 Study Selection: two independent reviewers identified all statin RCT follow-up reports  
24  
25 36 including  $\geq 1000$  participants, and cardiovascular and all-cause mortality.  
26

27 37 Data Extraction and Synthesis: Independent data extraction was done by two reviewers  
28  
29 38 according to PRISMA guidelines.  
30  
31

32 39 Main Outcomes: post-trial CVD and all-cause mortality.  
33  
34

35 40 **Results:** We included 8 trials, with mean post-trial follow-up ranging from 1.6-15.1 years,  
36  
37 41 and including 13,781 post-trial deaths (6,685 CVD). Direct effects within-trials were greater  
38  
39 42 than legacy effects post-trials. The pooled data from all eight studies showed no evidence  
40  
41 43 overall of legacy effects on CVD mortality, but some evidence of legacy effects on all-cause  
42  
43 44 mortality ( $p=0.01$ ). Exploratory subgroup analysis found possible differences in legacy effect  
44  
45 45 for primary prevention trials compared to secondary prevention trials for both CVD mortality  
46  
47 46 ( $p=0.15$ ) and all-cause mortality ( $p=0.02$ ). Pooled post-trial hazard ratios for the three  
48  
49 47 primary prevention studies demonstrated possible post-trial legacy effects on CVD mortality  
50  
51 48 (HR=0.87; 95% CI 0.79-0.95) and on all-cause mortality (HR=0.90; 95% CI 0.85-0.96).  
52  
53  
54  
55  
56  
57  
58  
59  
60

1  
2  
3 49 **Conclusions:** Possible post-trial statin legacy effects on all-cause mortality appear to be  
4  
5 50 driven by the primary prevention studies. Although these relative benefits were smaller than  
6  
7 51 those observed within-trial, the absolute benefits may be similar for the two time periods.  
8  
9 52 Analysis of individual patient data from follow-up studies after placebo controlled statin  
10  
11 53 RCTs in lower risk populations may provide more definitive evidence on whether early  
12  
13 54 treatment of subclinical atherosclerosis is likely to be beneficial.  
14  
15

16 55

17 56 Abstract word count: 289  
18

19 57

### 20 58 **Keywords**

21 59 Hydroxymethylglutaryl-CoA Reductase Inhibitors

22 60 Cholesterol

23 61 Lipids

24 62 Early Diagnosis

25 63 Randomised Controlled Trial

26 64 Follow-up Studies

27 65 Meta-Analysis  
28  
29  
30  
31  
32

### 33 67 **Strengths and limitations of this study**

- 34 68
- 35 69 • Our sensitive search strategy means this study is likely to have included all follow-up  
36 70 reports of the major placebo controlled statin trials, including recent follow-up reports  
37 71 for two of the studies (WOSCOPS and LIPID).
  - 38 72 • We focus analysis on the post-trial period which is best for detection of legacy effects,  
39 73 however post-trial data are no longer a randomised comparison, and legacy effects  
40 74 may be larger than we estimated.
  - 41 75 • The main limitation is that our findings are based on aggregate data, and we did not  
42 76 have information on whether or not an individual was treated with statins during the  
43 77 post-trial period, and for how long, as well as their cardiovascular risk factor levels  
44 78 and other potential confounders.  
45  
46  
47  
48  
49  
50  
51  
52  
53  
54  
55  
56  
57  
58  
59  
60



1  
2  
3 78 **Funding statement:** This work was supported by the Australian National Health and  
4  
5 79 Medical Research Council (Early Career Fellowship No. 1013390, Australia Fellowship No.  
6  
7 80 527500 and Program Grant No 633003). The funders had no role in design and conduct of the  
8  
9 81 study; collection, management, analysis, and interpretation of the data; and preparation,  
10  
11 82 review, or approval of the manuscript.  
12  
13

14 83 **Competing Interest Statement:** All authors have no competing interests to declare.  
15  
16 84  
17  
18 85  
19  
20  
21  
22  
23  
24  
25  
26  
27  
28  
29  
30  
31  
32  
33  
34  
35  
36  
37  
38  
39  
40  
41  
42  
43  
44  
45  
46  
47  
48  
49  
50  
51  
52  
53  
54  
55  
56  
57  
58  
59  
60

## 86 INTRODUCTION

87 'Legacy effects' are treatment effects that persist or emerge at some time after trial treatment  
88 ends. The existence, or not, of such legacy effects have important clinical implications,  
89 including the potential value of starting preventative treatment at a younger age, and the risks  
90 of treatment cessation. Although technically even short term or transient improvement or  
91 worsening of symptoms and signs may be classified as a legacy effect, most people appear to  
92 use the term to indicate sustained clinical benefit or harm.(1-7) Legacy effects have been  
93 explained as the "memory of a treatment given in an early phase of a disease which produces  
94 benefits long after the cessation of intervention".(2) They are an extension of the belief that  
95 we should intervene with treatment early on in the course of a chronic disease/condition; the  
96 legacy effect assumes that the duration of the condition predicts permanent pathological  
97 changes which in turn are strong modifiers of treatment effectiveness.

98 Recently there has been considerable interest in the possible legacy effects of statins,(8, 9)  
99 sparked by reports on the long term outcomes for participants of large placebo controlled  
100 trials. In some of these reports,(4, 10) there is still a persistent survival advantage to  
101 participants who were randomised to statin during the trial, even though there was no or  
102 minimal difference in the management of participants after the trial ended. Legacy effects  
103 could indicate that earlier treatment with statins slows atherosclerotic plaque build-up in  
104 arteries and so alters the natural disease progression during a person's lifetime. As with the  
105 direct effects of statins, these legacy effects may be pleiotropic, and act through anti-  
106 inflammation, anti-coagulation and or lipid lowering. This hypothesis has some support from  
107 the finding that statins have minimal effect on CVD prevention in patients with advanced  
108 kidney disease who require haemodialysis, and who have high short term risk of CVD, (11)  
109 but reduce CVD events in patients with earlier chronic kidney disease who are not yet  
110 requiring haemodialysis.(12) There are also some data from a small imaging study of patients

1  
2  
3 111 with angina to support the early treatment hypothesis, where similar reduction in lipid levels  
4  
5 112 appeared to result in reduction in plaque volume only in participants younger than 65  
6  
7 113 years.(13) Finally, differences in long term response to statins are noted for primary  
8  
9 114 prevention trials compared with secondary prevention trials.(14) To this end, aggressive lipid  
10  
11 115 lowering therapy in much younger individuals with lower risk for cardiovascular disease has  
12  
13 116 been suggested as a possible means of primary prevention. Some have argued for universal  
14  
15 117 screening of cholesterol levels in young people and offering early statin treatment to those  
16  
17 118 with raised levels,(15-17) whereas others have argued that statins be offered to all young  
18  
19 119 people, regardless of cholesterol levels. (5, 18)  
20  
21  
22  
23 120  
24  
25

26 121 At least some of the survival benefit observed on long term follow-up is attributable to the  
27  
28 122 direct treatment effects on cardiovascular disease outcomes observed during the within-trial  
29  
30 123 period. To illustrate this point we generated data to simulate the situation where there was  
31  
32 124 (eFigure 1A and 1B), and was not (eFigure 1C and 1D), a legacy effect (we simulated two  
33  
34 125 scenarios where an intervention has effects during the trial period, and (i) has an effect after  
35  
36 126 the trial (legacy effect) or (ii) has no effect after the trial (no legacy effect).In the survival  
37  
38 127 curves of both scenarios the apparent legacy effect is exaggerated because the cumulative  
39  
40 128 incidence includes the direct effects during the initial trial period (eFigure 1A and 1C). If  
41  
42 129 hazard curves are constructed instead, the direct effects during the initial trial period are not  
43  
44 130 included in the instantaneous hazard of the post trial periods, allowing an unbiased estimation  
45  
46 131 of the legacy effect (eFigure 1B and 1D; note that these are curves of the instantaneous hazard  
47  
48 132 at each time point, and are not curves of hazard ratios. Details of the methods for the  
49  
50 133 simulation are provided in the Appendix). Although survival curves like eFigure 1A and 1C  
51  
52 134 demonstrate that the direct effects of the intervention (observed during the trial period) are  
53  
54 135 still apparent many years later, they do not provide evidence of legacy effects after the  
55  
56  
57  
58  
59  
60

1  
2  
3 136 intervention has ceased. From the hazard curves in eFigure 1B and 1D it is clear that to  
4  
5 137 estimate legacy effects, we should instead focus on outcomes observed during the post-trial  
6  
7 138 period. To this end, we aimed to identify and combine estimates of the effect of trial  
8  
9 139 treatment group allocation on post-trial all-cause and CVD mortality from published reports  
10  
11 140 on the long term follow-up after placebo controlled trials of statins.  
12  
13

## 14 141 **METHODS**

### 15 142 **Protocol and Registration**

16  
17  
18  
19  
20 143 The review protocol was not registered.  
21

### 22 144 **Selection**

23  
24  
25 145 We performed a systematic search and meta-analysis of all reports on follow-up after  
26  
27 146 randomized, placebo-controlled studies of adults (age >18 years) of statins with  $\geq 1000$   
28  
29 147 participants. As the legacy effect relates to the difference in treatment received within the  
30  
31 148 trial period, we focused our analysis on follow up reports of high quality, large RCTs. We  
32  
33 149 chose to limit our studies to those with  $\geq 1000$  participants in the original trial for consistency  
34  
35 150 with the Cholesterol Treatment Trialists' Collaboration. These large trials were designed to  
36  
37 151 assess effects on mortality within the trial period, and their follow-up reports are the most  
38  
39 152 appropriate studies to address post-trial effects on mortality. We excluded studies that did not  
40  
41 153 report mortality data during post-trial follow-up. The primary outcomes were death due to all-  
42  
43 154 causes and due to cardiovascular disease.  
44  
45  
46

### 47 155 **Search strategy**

48  
49  
50 156 We identified placebo controlled RCTs of cholesterol lowering treatment from the  
51  
52 157 Cholesterol Treatment Trialists' Collaboration (19) and ran forward citation searches in  
53  
54 158 Scopus; search was limited to those citations which included one of the investigators from the  
55  
56  
57  
58  
59  
60

1  
2  
3 159 RCT. We searched for additional reports in Medline and Embase with no earliest date  
4  
5 160 restriction, though to 16th June 2016 using the terms listed in Box 1, with no restrictions on  
6  
7 161 year published, type of publication, or language. We checked references of included studies  
8  
9 162 to identify further relevant papers and contacted trialists to identify updated or additional  
10  
11 163 reports.  
12  
13

14 **Box 1: Search terms for Medline Search:**

15  
16 1 Follow-Up Studies/  
17  
18 2 random\$.tw  
19  
20 3 placebo.tw  
21  
22 4 Hydroxymethylglutaryl-CoA Reductase Inhibitors/  
23  
24 5 cholesterol/  
25  
26 8 lipids/  
27  
28 10 (#1) AND (#2) AND (#3) AND (#4 OR #5 OR #6)  
29  
30  
31

32 164

33  
34  
35 165 **Validity assessment**

36  
37 166 Two authors (AN and LZ) extracted data for both within-trial and post-trial periods on the  
38  
39 167 following characteristics which may bias the estimated legacy effect: Mean follow-up (years),  
40  
41 168 Difference in proportion taking statins.  
42  
43

44 169 **Study selection and data abstraction**

45  
46 170 Two authors (AN and KB) independently checked the titles and abstracts of all citations  
47  
48 171 identified through the database searches and forward citation search. Full text was obtained if  
49  
50 172 either author judged the article potentially relevant. The same two authors then independently  
51  
52 173 checked all the full text articles for eligibility, resolving disagreements through discussion.  
53  
54  
55  
56  
57  
58  
59  
60

1  
2  
3 174 Two authors independently extracted clinical data (AN and LZ) using standardized forms,  
4  
5 175 deciding disagreements through discussion with a third author (KB). We did not calculate  
6  
7 176 formal measures of agreement to describe agreement between reviewers. The Cochrane  
8  
9 177 Collaboration recommends against doing this, and instead recommends exploring reasons for  
10  
11 178 any disagreement early on in the review process(20), which we did through discussion. We  
12  
13 179 extracted separate data on all-cause mortality and CVD specific mortality for the within-trial  
14  
15 180 and post-trial periods; the number of people at risk of each type of event at the start of the  
16  
17 181 trial and at the start of the post-trial follow-up; the proportion of people taking statins within  
18  
19 182 trial and post-trial; the duration of follow-up within trial and post-trial. We attempted to  
20  
21 183 extract differences in mean total cholesterol, but these were missing for at least one of the  
22  
23 184 periods in the majority of studies. Further data on the original trials was obtained from  
24  
25 185 CTTC.(21)  
26  
27  
28  
29  
30

### 31 187 **Statistical methods**

32  
33  
34 188 Summary statistics and plots for individual trials were generated using SAS 9.4.

35  
36  
37 189 Meta-analytic models of post-trial data were built using STATA (version 14.2).

38  
39  
40 190 We built meta-analytic models for CVD mortality and all-cause mortality using reported  
41  
42 191 number of events and number at risk for the post-trial period. Our principal summary  
43  
44 192 measures for the models were relative risk and hazard ratios. We used adjusted relative risks  
45  
46 193 where these were reported, and calculated unadjusted relative risks where they were not. We  
47  
48 194 built random effects models for the analysis. We assessed the heterogeneity of results using  
49  
50 195 visual inspection of forest plots and  $I^2$  statistics, and we conducted exploratory subgroup  
51  
52 196 analysis using meta-regression to compare primary and secondary prevention trials. For the  
53  
54  
55  
56  
57  
58  
59  
60

1  
2  
3 197 subgroup analysis, we tested for subgroup differences using a permutation test with 1000  
4  
5 198 permutations(22).  
6  
7

8 199 We also built hazard ratio meta-analytic models for CVD mortality and all-cause mortality  
9  
10 200 where these were reported in the primary studies. We undertook sensitivity analysis by  
11  
12 201 restricting the model to primary prevention trials.  
13  
14

## 15 202 **Patient and Public Involvement**

16  
17  
18 203 Patients and or public were not involved in this meta-analysis of published data.  
19  
20  
21 204

## 22 23 24 205 **RESULTS**

25  
26  
27 206 We identified 21 placebo-controlled RCTs of statins included in the CTTC for forward  
28  
29 207 citation searching(23-43) which retrieved 1520 abstracts (restricting search to reports which  
30  
31 208 included an original trialist as an author). We identified a further 828 abstracts from Medline  
32  
33 209 and Embase (searches to 16 June 2016), and after excluding duplicates, 1520 titles and  
34  
35 210 abstracts were screened. We retrieved 61 papers for full text review, 47 of which did not  
36  
37 211 meet our selection criteria (eFigure 2). Reference searching of the remaining 14 studies  
38  
39 212 identified one further study. Seven of the 15 studies used overlapping data: for each set of  
40  
41 213 potentially overlapping reports, we chose the most recent report. This resulted in eight studies  
42  
43 214 finally included in our review (Table 1).  
44  
45  
46  
47 215

48  
49  
50 216 The original RCTs ranged in mean duration from 3.2 to 5.2 years, included trials of  
51  
52 217 simvastatin, pravastatin, fluvastatin and atorvastatin, and their primary results were published  
53  
54 218 between 1994 and 2003. Of the randomised participants in each trial, 0 to 52% were women,  
55  
56  
57  
58  
59  
60

1  
2  
3 219 the mean age ranged from 50 to 75 years, and 1 to 35% were diabetic. Between 8 and 100%  
4  
5 220 had pre-existing CVD: three predominantly primary prevention/asymptomatic populations,  
6  
7 221 and five predominantly secondary prevention/symptomatic populations. The difference in the  
8  
9 222 proportion of people taking a statin in the randomised groups within the trial period (statin –  
10  
11 223 placebo) ranged from 51% to 89%. Hazard ratios (or relative risk ratio estimates when hazard  
12  
13 224 ratios were unknown) for all-cause mortality and CVD-specific mortality within the trial  
14  
15 225 period ranged from 0.70 to 1.02, and 0.64 to 0.96 respectively (eTable 1).  
16  
17  
18  
19 226

20  
21  
22 227 The post-trial follow up ranged in mean duration from 1.6 to 15.1 years. The difference in  
23  
24 228 proportion of people taking a statin in the post-trial period (for those originally randomized to  
25  
26 229 statin minus those randomized to placebo) ranged from 0 to 4% (unknown for two studies).  
27  
28 230 Collectively, the included studies reported on post-trial follow-up of 55,732 people with  
29  
30 231 13,781 deaths which occurred after the trials ended, of which 6,685 were attributed to CVD.  
31  
32 232 The hazard ratios (or relative risk estimates) for all-cause mortality and CVD-specific  
33  
34 233 mortality ranged from 0.85 to 1.03, and 0.82 to 1.14 respectively (eTable 2).  
35  
36  
37

#### 38 234 **Individual trials – comparison of within trial and post-trial effects**

39  
40 235 The results for CVD specific mortality for the individual trials are presented in eTables 1 and  
41  
42 236 2, and Fig 1. Of the 8 included trials, the six which demonstrated significant reductions in  
43  
44 237 CVD mortality within the trial period (WOSCOPS, ALERT, SSSS, PROSPER, HPS and  
45  
46 238 LIPID), showed less benefit in the post-trial period than in the trial period. The two trials  
47  
48 239 without significant reduction in CVD mortality within the trial period (ALLHAT-LLA and  
49  
50 240 ASCOT-LLA) showed a similar lack of evidence for benefit post-trial. In only one of the 8  
51  
52 241 trials was there a significant reduction in CVD mortality for the post-trial period  
53  
54  
55 242 (WOSCOPS).  
56  
57  
58  
59  
60



1  
2  
3 243 The results for all-cause mortality for the individual trials are presented in eTables 1 and 2,  
4  
5 244 and Fig 2. Of the 8 included trials, the four which demonstrated significant reduction in all-  
6  
7 245 cause mortality within the trial period (WOSCOPS, SSSS, HPS and LIPID) showed less  
8  
9 246 benefit in the post-trial period than in the trial period. Three trials without a significant  
10  
11 247 reduction in mortality within the trial period (ALLHAT-LLA, ALERT and PROSPER)  
12  
13 248 showed a similar lack of evidence for benefit post-trial. One trial (ASCOT-LLA) without a  
14  
15 249 significant reduction in mortality with the trial period demonstrated more benefit in the post-  
16  
17 250 trial period. In only two of the 8 trials was there a significant reduction in all-cause mortality  
18  
19 251 in the post-trial period (WOSCOPS and ASCOT-LLA).  
20  
21  
22  
23  
24  
25

252

### 253 **Post-trial meta-analysis**

254 The relative risk random effect meta-analysis using post-trial data from all eight studies is  
255 presented in Fig 3 (CVD mortality) and Fig 4 (all-cause mortality). Although there was no  
256 evidence overall of a post-trial (legacy) effect on CVD ( $p=0.15$ ), there was some evidence of  
257 a legacy effect on all-cause mortality ( $p=0.01$ ). In the exploratory sub-group analysis there  
258 appeared to be a difference in the post-trial (legacy) effect of statins for primary prevention  
259 compared with secondary prevention studies for both CVD and for all-cause mortality. The  
260 pooled relative risk of CVD death post-trial for those originally allocated statin compared to  
261 placebo was 0.91 (0.84-0.98) for primary prevention trials, and 0.99 (0.94-1.05) for  
262 secondary prevention trials (permutation test  $p$ -value for sub-group difference= $0.15$ ) (Fig 3).  
263 The pooled relative risk of all-cause death post-trial for those originally allocated statin  
264 compared to placebo was 0.92 (0.88-0.96) for primary prevention trials and 0.99 (0.95-1.03)  
265 for secondary prevention trials (permutation test  $p$ -value for sub-group difference= $0.02$ ) (Fig  
266 4).

1  
2  
3 267 The hazard ratio meta-analysis, using post-trial data from the 4 studies reporting hazard ratios,  
4  
5 268 is presented in Fig 5 (CVD mortality) and 6 (all-cause mortality). Similar to the meta-analysis  
6  
7 269 of relative risks, there was no definite evidence of a post-trial (legacy) effect on CVD  
8  
9 270 ( $p=0.09$ ), but some evidence of a legacy effect on all-cause mortality ( $p=0.02$ ). Pooling data  
10  
11 271 from all four studies resulted in substantial heterogeneity between studies (I-squared=40.7%  
12  
13 272 for CVD mortality and 42.3% for all-cause mortality). Restricting meta-analysis to the three  
14  
15 273 primary prevention trials resulted in very low heterogeneity between studies (I-squared=0.0%  
16  
17 274 for CVD mortality and 8.1% for all-cause mortality), and these results are presented in Fig 7  
18  
19 275 (CVD mortality) and Fig 8 (all-cause mortality). In the three primary prevention trials, the  
20  
21 276 pooled hazard ratio for CVD death post-trial for those originally allocated statin compared to  
22  
23 277 placebo was 0.87 (0.79 to 0.95,  $p=0.003$ ) and for all-cause death it was 0.90 (0.85 to 0.96,  
24  
25 278  $p=0.001$ ).

26  
27  
28  
29  
30 279

## 31 280 **DISCUSSION**

32  
33 281 We identified eight large randomized trials which had usable post-trial data to assess legacy  
34  
35 282 effects on mortality outcomes. The direct effects of the statins on mortality reduction  
36  
37 283 observed during the trials, were much larger than potential legacy effects observed post-trial,  
38  
39 284 which suggests the rhetoric on legacy effects for statins in general may not reflect the  
40  
41 285 empirical evidence. WOSCOPS was the only trial to show a possible post-trial legacy effect  
42  
43 286 on all-cause and CVD specific mortality. When we pooled data from all eight studies we  
44  
45 287 found no evidence overall of legacy effects on CVD mortality, but some evidence of possible  
46  
47 288 legacy effects on all-cause mortality. In the exploratory sub-group analysis, there was some  
48  
49 289 evidence of a difference in results for primary prevention compared with secondary  
50  
51 290 prevention. Considering these subgroups separately, we found no evidence of legacy effects  
52  
53 291 following secondary prevention trials, suggesting the importance of long term /life-long  
54  
55  
56  
57  
58  
59  
60

1  
2  
3 292 prevention in these patients. We found evidence of possible post-trial legacy effects only  
4  
5 293 where statins were started for primary prevention – these effects were observed on both CVD  
6  
7 294 mortality (HR=0.87, p=0.003) and all-cause mortality (HR=0.90, p<0.001) (Fig 3C and 3D).  
8  
9 295 Participants originally randomised to placebo in two of the primary prevention trials  
10  
11 296 (WOSCOPS and ASCOT-LLA) had 4% lower rates of using a statin in the first years post-  
12  
13 297 trial, which will exaggerate the estimated legacy effect (bias away from the null), but this  
14  
15 298 difference is unlikely to account for all the observed post-trial benefit (whether there was a  
16  
17 299 difference in statin use post-trial in ALLHAT is not known). The observed post-trial  
18  
19 300 reductions in CVD and all-cause mortality may potentially represent real legacy effects of  
20  
21 301 statins for populations similar to those at the time of recruitment into these studies. There  
22  
23 302 may be a higher likelihood of observing legacy effects for statins when this is started for  
24  
25 303 primary prevention, rather than for secondary prevention.  
26  
27  
28  
29  
30  
31

32 305 Our sensitive search strategy means this study is likely to have included all published follow-  
33  
34 306 up reports of the major placebo controlled statin trials, including recent follow-up reports for  
35  
36 307 two of the studies (WOSCOPS and LIPID). However we did not assess for publication bias  
37  
38 308 and it is possible that unpublished follow-up reports may exist that we are unaware of. We  
39  
40 309 did not assess risk of bias for the included studies, but this has been assessed by others for the  
41  
42 310 original trial reports, including very recently(44), and the included studies were generally  
43  
44 311 found to be high quality. Although we believe the post-trial period is the best period to  
45  
46 312 analyse for detection of legacy effects, these data are no longer a randomised comparison:  
47  
48 313 some patients randomised to the statin would have been saved from dying, whereas some  
49  
50 314 patients in the placebo group were not. Hence, there are additional survivors in the statin  
51  
52 315 group at the beginning of post-trial follow-up who are also likely to be at higher risk of CVD  
53  
54 316 than survivors in the placebo group. These differences would tend to bias our results towards  
55  
56  
57  
58  
59  
60

1  
2  
3 317 the null, and mean that legacy effects may be larger than we estimated. The main limitation  
4  
5 318 of our report is that because our findings are based on aggregate data, we are unable to assess  
6  
7 319 the effects of whether or not an individual was treated with statins during the post-trial period,  
8  
9 320 and for how long, as well as their cardiovascular risk factor levels and other potential  
10  
11 321 confounders. For example although we found evidence of possible legacy effects in primary  
12  
13 322 care, these are largely driven by WOSCOPs which was undertaken in all male participants. If  
14  
15 323 there are sex-specific effects for legacy effects, it may be the fact that all participants in  
16  
17 324 WOSCOPS were male, and not that they had no history of CVD, that is the more important  
18  
19 325 determinant. Similarly, participants in WOSCOPS had the lowest percentage taking statins in  
20  
21 326 the post trial period out of all the studies where this was measured (39% of active and 35% of  
22  
23 327 placebo participants were taking statins at 5 years post-trial). This comparative absence of  
24  
25 328 direct statin treatment effects in the post trial period may be the more important determinant.  
26  
27  
28  
29

30 329

31  
32 330 We did not examine evidence of possible legacy effects on other outcomes such as non-fatal  
33  
34 331 CVD, or for different post-trial follow-up times within each study, or for the same post-trial  
35  
36 332 follow-up times between studies. We are aware of four other meta-analyses of data from long  
37  
38 333 term follow-up after placebo controlled trials of lipid lowering treatment.(45-48) In three of  
39  
40 334 these reports, the focus appears to have been on persistence of survival benefit, with  
41  
42 335 comparison of event rates from time of randomisation, rather than post-trial legacy effect.(45,  
43  
44 336 47, 48) The other meta-analysis reported separate results for the post-trial period using data  
45  
46 337 from earlier follow-up reports of six of our included trials.(46) That report found evidence of  
47  
48 338 post-trial reduction in CVD mortality and all-cause mortality at two years, and evidence for a  
49  
50 339 reduction in major coronary events at both two years and over the total post-trial periods. The  
51  
52 340 authors did not explore possible causes of heterogeneity for the post-trial models such as  
53  
54 341 whether the primary trial was for primary or secondary prevention.  
55  
56  
57  
58  
59  
60

342

343 Published trial evidence supports the hypothesis that lowering cholesterol with a statin drug  
344 reduces cardiovascular events.(49) Currently, the principle of using absolute risk to guide  
345 treatment decisions (as recommended by guidelines(50-53)) is that treatment is prioritised for  
346 those at highest short term risk, and people at low short term risk are not treated. Data on the  
347 efficacy and safety of statins has led to treatment thresholds being lowered: in the UK the  
348 threshold was lowered from >20% to >10% ten-year risk of CVD; in the US the threshold is  
349 10% ten-year risk of CVD, with statins also recommended for selected patients with 7.5-10%  
350 ten-year risk.(53) However, as short term risk is largely driven by age, younger people are  
351 unlikely to qualify for statins even with these lowered thresholds. For example, a recent  
352 report found that in the absence of smoking or raised blood pressure, a ten-year risk of CVD  
353 above 5% was infrequent in women younger than 50 and men younger than 40 years resident  
354 in the US.(54)

355

356 Exploratory subgroup analysis in our study found evidence of possible legacy effects of  
357 statins following the primary prevention trials, which warrant further investigation. However,  
358 we note that the participants in WOSCOPS, ALLHAT and ASCOT-LLA had elevated levels  
359 of CVD risk factors (see table 1). Indeed, the majority of these people were likely to have  
360 been well above current treatment thresholds at the time of trial entry, and people with similar  
361 risk levels would now be recommended to start life-long lipid lowering treatment. For  
362 example, the proportion of people who had died of cardiovascular disease by the end of the  
363 trial in the placebo group after 3.3 years in ASCOT, 4.8 years in ALLHAT and 4.9 years in  
364 WOSCOPS was 3%, 11% and 2% respectively. Legacy effects in these settings serve to  
365 emphasise the benefits of starting long term primary prevention treatment early rather than

1  
2  
3 366 later among people at high short term risk. It does not provide evidence to support earlier  
4  
5 367 treatment for people who have lower short term risk than current treatment thresholds.  
6  
7

8 368

9  
10  
11 369 Advocates of early intervention argue that people who are at risk of disease in the long term,  
12  
13 370 but currently displaying no symptoms or signs of disease and at low calculated short term risk,  
14  
15 371 should also be started on long term treatment at an early age.(5, 18) But deciding when, and  
16  
17 372 if, to intervene in these people is much less straight forward. The legacy effect hypothesis for  
18  
19 373 statins - that the earlier you start , the lower your risk of a CVD event in the long term- has  
20  
21 374 not been tested directly in a RCT comparing statins commencement at an earlier versus later  
22  
23 375 age, and such a trial is unlikely to eventuate. Indirect evidence from post-trial follow-up after  
24  
25 376 the large statin trials is likely the next best way to investigate this.  
26  
27

28  
29 377

30  
31  
32 378 **CONCLUSION.**  
33

34  
35 379 In this analysis of 8 long-term randomized trials, we found possible post-trial legacy effects  
36  
37 380 of statins on CVD mortality and all-cause mortality for primary prevention. Although the  
38  
39 381 post-trial relative benefits were clearly smaller than those observed within trials, the  
40  
41 382 increasing risk with age may mean that the absolute benefits are similar. Analysis of  
42  
43 383 individual patient data from follow-up studies after placebo similar RCTs in lower risk  
44  
45 384 populations may provide more definitive evidence on whether early treatment of subclinical  
46  
47 385 atherosclerosis is likely to be beneficial.  
48  
49

50  
51 386

52  
53  
54 387  
55  
56  
57  
58  
59  
60

1  
2  
3 388 **Authors contributions**  
4

5  
6 389 Agnish Nayak acquired, analysed and interpreted the data, contributed to the statistical  
7  
8 390 analysis, critically revised the manuscript for important intellectual content and approved the  
9  
10 391 final version.

11  
12  
13 392 Andrew Hayen undertook the main statistical analysis, interpreted the data, critically revised  
14  
15 393 the manuscript for important intellectual content and approved the final version.

16  
17  
18 394 Lin Zhu acquired, analysed and interpreted the data, contributed to the statistical analysis,  
19  
20 395 critically revised the manuscript for important intellectual content and approved the final  
21  
22 396 version.

23  
24  
25 397 Kevin McGeechan interpreted the data, critically revised the manuscript for important  
26  
27 398 intellectual content and approved the final version.

28  
29  
30 399 Paul Glasziou interpreted the data, critically revised the manuscript for important intellectual  
31  
32 400 content and approved the final version

33  
34  
35 401 Les Irwig obtained funding, interpreted the data, critically revised the manuscript for  
36  
37 402 important intellectual content and approved the final version

38  
39  
40 403 Jenny Doust interpreted the data, critically revised the manuscript for important intellectual  
41  
42 404 content and approved the final version

43  
44  
45 405 Gabriel Gregory interpreted the data, contributed to the statistical analysis, critically revised  
46  
47 406 the manuscript for important intellectual content and approved the final version.

48  
49  
50 407 Katy Bell obtained funding, conceived the study and design, acquired, analysed and  
51  
52 408 interpreted the data:, supervised the study, drafted the manuscript and revised for important  
53  
54  
55  
56  
57  
58  
59  
60

1  
2  
3 409 intellectual content and approved the final version. She had full access to all of the data in the  
4  
5 410 study and takes responsibility for the integrity of the data and accuracy of the data analysis.  
6  
7

8 411

9  
10 412 **Acknowledgements:** We thank Colin McCowan, Chris Packard and Ian Ford for providing  
11  
12 413 unpublished data on events and hazard ratios for the 15-year post-trial period after  
13  
14 414 WOSCOPS.  
15

16  
17  
18 415 **A data sharing statement:** All data are supplied in this publication, no additional data are  
19 416 available.  
20  
21  
22  
23  
24  
25  
26  
27  
28  
29  
30  
31  
32  
33  
34  
35  
36  
37  
38  
39  
40  
41  
42  
43  
44  
45  
46  
47  
48  
49  
50  
51  
52  
53  
54  
55  
56  
57  
58  
59  
60



417 **REFERENCES**

- 418 1. Chalmers J, Cooper ME. UKPDS and the legacy effect. *N Engl J Med*. 2008;359(15):1618-20.
- 419 2. Coppo R. Is a legacy effect possible in IgA nephropathy? *Nephrol Dial Transplant*.
- 420 2013;28(7):1657-62.
- 421 3. Sever PS, Chang CL, Gupta AK, Whitehouse A, Poulter NR. The Anglo-Scandinavian Cardiac
- 422 Outcomes Trial: 11-year mortality follow-up of the lipid-lowering arm in the UK. *Eur Heart J*.
- 423 2011;32(20):2525-32.
- 424 4. Ford I, Murray H, McCowan C, Packard CJ. Long-Term Safety and Efficacy of Lowering Low-
- 425 Density Lipoprotein Cholesterol With Statin Therapy- 20-Year Follow-Up of West of Scotland
- 426 Coronary Prevention Study. *Circulation*. 2016;133(11):1073-80.
- 427 5. Robinson JG, Gidding SS. Curing atherosclerosis should be the next major cardiovascular
- 428 prevention goal. *J Am Coll Cardiol*. 2014;63(25 Pt A):2779-85.
- 429 6. Sauser K, Levine DA, Hayward RA. A review of the clinical evidence related to early
- 430 treatment of elevated LDL for cardiovascular primary prevention. *Evid Based Med*. 2015;20(5):162-9.
- 431 7. Daniels SR. Prevention of atherosclerotic cardiovascular disease: what is the best approach
- 432 and how early should we start? *J Am Coll Cardiol*. 2014;63(25 Pt A):2786-8.
- 433 8. O'Riordan M. 'Legacy Effects' of Statins: 14% Reduction in Mortality. [updated August 28,
- 434 2011. Available from: <http://www.medscape.com/viewarticle/748687>.
- 435 9. O'Riordan M. WOSCOPS at 20 years: study shows lifetime benefit with 5 years of statin
- 436 therapy. [updated November 20, 2014. Available from:
- 437 <http://www.medscape.com/viewarticle/835238>.
- 438 10. Sever PS, Chang CL, Gupta AK, Whitehouse A, Poulter NR. The Anglo-Scandinavian Cardiac
- 439 Outcomes Trial: 11-year mortality follow-up of the lipid-lowering arm in the UK. *European Heart*
- 440 *Journal*. 2011;32(20):2525-32.
- 441 11. Palmer SC, Navaneethan SD, Craig JC, Johnson DW, Perkovic V, Nigwekar SU, et al. HMG CoA
- 442 reductase inhibitors (statins) for dialysis patients. *Cochrane Database Syst Rev*. 2013(9).
- 443 12. Palmer SC, Navaneethan SD, Craig JC, Johnson DW, Perkovic V, Hegbrant J, et al. HMG CoA
- 444 reductase inhibitors (statins) for people with chronic kidney disease not requiring dialysis. *Cochrane*
- 445 *Database Syst Rev*. 2014(5).
- 446 13. Nozue T, Yamamoto S, Tohyama S, Fukui K, Umezawa S, Onishi Y, et al. Impacts of age on
- 447 coronary atherosclerosis and vascular response to statin therapy. *Heart Vessels*. 2014;29(4):456-63.
- 448 14. Packard CJ, Ford I. Long-term follow-up of lipid-lowering trials. *Current opinion in lipidology*.
- 449 2015;26(6):572-9.
- 450 15. Ridker P, Cook NR. Cholesterol evaluation in young adults: Absence of clinical trial evidence
- 451 is not a reason to delay screening. *Annals of Internal Medicine*. 2017.
- 452 16. Expert panel on integrated guidelines for cardiovascular health and risk reduction in children
- 453 and adolescents: summary report. *Pediatrics*. 2011;128 Suppl 5:S213-56.
- 454 17. Goff DC, Jr., Lloyd-Jones DM, Bennett G, Coady S, D'Agostino RB, Sr., Gibbons R, et al. 2013
- 455 ACC/AHA guideline on the assessment of cardiovascular risk: a report of the American College of
- 456 Cardiology/American Heart Association Task Force on Practice Guidelines. *J Am Coll Cardiol*.
- 457 2014;63(25 Pt B):2935-59.
- 458 18. Packard CJ, Weintraub WS, Laufs U. New metrics needed to visualize the long-term impact of
- 459 early LDL-C lowering on the cardiovascular disease trajectory. *Vascular pharmacology*. 2015;71:37-9.
- 460 19. Mihaylova B, Emberson J, Blackwell L, Keech A, Simes J, Barnes EH, et al. The effects of
- 461 lowering LDL cholesterol with statin therapy in people at low risk of vascular disease: meta-analysis
- 462 of individual data from 27 randomised trials. *Lancet*. 2012;380(9841):581-90.
- 463 20. Higgins JPT GS. *Cochrane Handbook for*
- 464 *Systematic Reviews of Interventions Version 5.1.0*

- 1  
2  
3 465 [updated March 2011]. 2011 [Available from: <http://training.cochrane.org/handbook>.  
4 466 21. Baigent C, Keech A, Kearney PM, Blackwell L, Buck G, Pollicino C, et al. Efficacy and safety of  
5 467 cholesterol-lowering treatment: prospective meta-analysis of data from 90,056 participants in 14  
6 468 randomised trials of statins. *Lancet*. 2005;366(9493):1267-78.  
7 469 22. Higgins JP, Thompson SG. Controlling the risk of spurious findings from meta-regression. *Stat*  
8 470 *Med*. 2004;23(11):1663-82.  
9 471 23. UK Prospective Diabetes Study Group. Tight blood pressure control and risk of  
10 472 macrovascular and microvascular complications in type 2 diabetes: UKPDS 38. *BMJ*. 1998;317:703-13.  
11 473 24. GISSI Prevenzione Investigators. Results of the low-dose (20 mg) pravastatin GISSI  
12 474 Prevenzione trial in 4271 patients with recent myocardial infarction: do stopped trials contribute to  
13 475 overall knowledge? *Ital Heart J*. 2000;1(12):810-20.  
14 476 25. Major outcomes in moderately hypercholesterolemic, hypertensive patients randomized to  
15 477 pravastatin vs usual care: The Antihypertensive and Lipid-Lowering Treatment to Prevent Heart  
16 478 Attack Trial (ALLHAT-LLT). *JAMA*. 2002;288(23):2998-3007.  
17 479 26. Colhoun HM, Betteridge DJ, Durrington PN, Hitman GA, Neil HA, Livingstone SJ, et al. Primary  
18 480 prevention of cardiovascular disease with atorvastatin in type 2 diabetes in the Collaborative  
19 481 Atorvastatin Diabetes Study (CARDS): multicentre randomised placebo-controlled trial. *Lancet*.  
20 482 2004;364(9435):685-96.  
21 483 27. Downs JR, Clearfield M, Weis S, Whitney E, Shapiro DR, Beere PA, et al. Primary prevention  
22 484 of acute coronary events with lovastatin in men and women with average cholesterol levels: results  
23 485 of AFCAPS/TexCAPS. Air Force/Texas Coronary Atherosclerosis Prevention Study. *JAMA*.  
24 486 1998;279(20):1615-22.  
25 487 28. Fellström BC, Jardine AG, Schmieder RE, Holdaas H, Bannister K, Beutler J, et al. Rosuvastatin  
26 488 and Cardiovascular Events in Patients Undergoing Hemodialysis. *N Engl J Med*. 2009;360(14):1395-  
27 489 407.  
28 490 29. The Long-Term Intervention with Pravastatin in Ischaemic Disease Study Group. Prevention  
29 491 of Cardiovascular Events and Death with Pravastatin in Patients with Coronary Heart Disease and a  
30 492 Broad Range of Initial Cholesterol Levels. *N Engl J Med*. 1998;339(19):1349-57.  
31 493 30. Holdaas H, Fellström B, Jardine AG, Holme I, Nyberg G, Fauchald P, et al. Effect of fluvastatin  
32 494 on cardiac outcomes in renal transplant recipients: A multicentre, randomised, placebo-controlled  
33 495 trial. *Lancet*. 2003;361(9374):2024-31.  
34 496 31. Kjekshus J, Apetrei E, Barrios V, Böhm M, Cleland JGF, Cornel JH, et al. Rosuvastatin in Older  
35 497 Patients with Systolic Heart Failure. *N Engl J Med*. 2007;357(22):2248-61.  
36 498 32. Knopp RH, d'Emden M, Smilde JG, Pocock SJ. Efficacy and safety of atorvastatin in the  
37 499 prevention of cardiovascular end points in subjects with type 2 diabetes: the Atorvastatin Study for  
38 500 Prevention of Coronary Heart Disease Endpoints in non-insulin-dependent diabetes mellitus (ASPEN).  
39 501 *Diabetes Care*. 2006;29(7):1478-85.  
40 502 33. Koren MJ, Hunninghake DB. Clinical outcomes in managed-care patients with coronary heart  
41 503 disease treated aggressively in lipid-lowering disease management clinics: the alliance study. *J Am*  
42 504 *Coll Cardiol*. 2004;44(9):1772-9.  
43 505 34. Nakamura H, Arakawa K, Itakura H, Kitabatake A, Goto Y, Toyota T, et al. Primary prevention  
44 506 of cardiovascular disease with pravastatin in Japan (MEGA Study): a prospective randomised  
45 507 controlled trial. *Lancet*. 2006;368(9542):1155-63.  
46 508 35. Ridker PM, Danielson E, Fonseca FAH, Genest J, Gotto AMJ, Kastelein JJP, et al. Rosuvastatin  
47 509 to Prevent Vascular Events in Men and Women with Elevated C-Reactive Protein. *N Engl J Med*.  
48 510 2008;359(21):2195-207.  
49 511 36. Sacks FM, Pfeffer MA, Moye LA, Rouleau JL, Rutherford JD, Cole TG, et al. The effect of  
50 512 pravastatin on coronary events after myocardial infarction in patients with average cholesterol levels.  
51 513 Cholesterol and Recurrent Events Trial investigators. *N Engl J Med*. 1996;335(14):1001-9.  
52  
53  
54  
55  
56  
57  
58  
59  
60

- 1  
2  
3 514 37. Scandinavian Simvastatin Survival Study G. Randomised trial of cholesterol lowering in 4444  
4 515 patients with coronary heart disease: the Scandinavian Simvastatin Survival Study (4S).  
5 516 *Lancet*.344(8934):1383-9.
- 6 517 38. Serruys PW, de Feyter P, Macaya C, Kokott N, Puel J, Vrolix M, et al. Fluvastatin for  
7 518 prevention of cardiac events following successful first percutaneous coronary intervention: a  
8 519 randomized controlled trial. *JAMA*. 2002;287(24):3215-22.
- 9 520 39. Sever PS, Dahlof B, Poulter NR, Wedel H, Beevers G, Caulfield M, et al. Prevention of  
10 521 coronary and stroke events with atorvastatin in hypertensive patients who have average or lower-  
11 522 than-average cholesterol concentrations, in the Anglo-Scandinavian Cardiac Outcomes Trial--Lipid  
12 523 Lowering Arm (ASCOT-LLA): a multicentre randomised controlled trial. *Lancet*. 2003;361(9364):1149-  
13 524 58.
- 14 525 40. Shepherd J, Blauw GJ, Murphy MB, Bollen EL, Buckley BM, Cobbe SM, et al. Pravastatin in  
15 526 elderly individuals at risk of vascular disease (PROSPER): a randomised controlled trial. *Lancet*.  
16 527 2002;360(9346):1623-30.
- 17 528 41. Shepherd J, Cobbe SM, Ford I, Isles CG, Lorimer AR, Macfarlane PW, et al. Prevention of  
18 529 Coronary Heart Disease with Pravastatin in Men with Hypercholesterolemia. *N Engl J Med*.  
19 530 1995;333(20):1301-8.
- 20 531 42. Tavazzi L, Maggioni AP, Marchioli R, Barlera S, Franzosi MG, Latini R, et al. Effect of  
21 532 rosuvastatin in patients with chronic heart failure (the GISSI-HF trial): a randomised, double-blind,  
22 533 placebo-controlled trial. *Lancet*. 2008;372(9645):1231-9.
- 23 534 43. Wanner C, Krane V, Marz W, Olschewski M, Mann JF, Ruf G, et al. Atorvastatin in patients  
24 535 with type 2 diabetes mellitus undergoing hemodialysis. *N Engl J Med*. 2005;353(3):238-48.
- 25 536 44. Navarese EP, Robinson JG, Kowalewski M, et al. Association between baseline ldl-c level and  
26 537 total and cardiovascular mortality after ldl-c lowering: A systematic review and meta-analysis. *JAMA*.  
27 538 2018;319(15):1566-79.
- 28 539 45. Kostis WJ, Moreyra AE, Cheng JQ, Dobrzynski JM, Kostis JB. Continuation of mortality  
29 540 reduction after the end of randomized therapy in clinical trials of lipid-lowering therapy. *J Clin Lipidol*.  
30 541 2011;5(2):97-104.
- 31 542 46. Lv HL, Jin DM, Liu M, Liu YM, Wang JF, Geng DF. Long-term efficacy and safety of statin  
32 543 treatment beyond six years: a meta-analysis of randomized controlled trials with extended follow-up.  
33 544 *Pharmacological research*. 2014;81:64-73.
- 34 545 47. Fulcher J, O'Connell R, GebSKI V, Keech A. Abstract 17765: A Meta-analysis of Outcomes at  
35 546 Two and Five Years After the Conclusion of Randomised Controlled Trials of Statin Therapy.  
36 547 *Circulation*. 2015;132(Suppl 3):A17765.
- 37 548 48. Hirakawa Y, Arima H, Rodgers A, Woodward M, Chalmers J. Cumulative in-trial and post-trial  
38 549 effects of blood pressure and lipid lowering: systematic review and meta-analysis. *J Hypertens*.  
39 550 2017;35(5):905-13.
- 40 551 49. Collins R, Reith C, Emberson J, Armitage J, Baigent C, Blackwell L, et al. Interpretation of the  
41 552 evidence for the efficacy and safety of statin therapy. *Lancet*. 2016;388(10059):2532–61.
- 42 553 50. Stone NJ, Robinson JG, Lichtenstein AH, Bairey Merz CN, Blum CB, Eckel RH, et al. 2013  
43 554 ACC/AHA guideline on the treatment of blood cholesterol to reduce atherosclerotic cardiovascular  
44 555 risk in adults: a report of the American College of Cardiology/American Heart Association Task Force  
45 556 on Practice Guidelines. *Circulation*. 2014;129((suppl 2)):S1-S45.
- 46 557 51. Therapeutic Guidelines Limited. Cardiovascular disease risk stratification- eTG Complete.  
47 558 Melbourne, Australia; 2016.
- 48 559 52. Cardiovascular Disease Risk Assessment Steering Group. Cardiovascular Disease Risk  
49 560 Assessment- New Zealand Primary Care Handbook 2012. New Zealand Ministry of Health; 2013.
- 50 561 53. National Institute for Health and Care Excellence. Cardiovascular disease: risk assessment  
51 562 and reduction, including lipid modification (Clinical Guideline CG 181) London: NICE; [updated  
52 563 September 2016. CG181:[Available from: <https://www.nice.org.uk/guidance/CG181/chapter/1-Recommendations>.  
53 564

1  
2  
3 565 54. Patel KK, Taksler GB, Hu B, Rothberg MB. Prevalence of elevated cardiovascular risks in  
4 566 young adults: A cross-sectional analysis of national health and nutrition examination surveys. Annals  
5 567 of Internal Medicine. 2017.

6  
7 568

8  
9  
10 569

11  
12  
13  
14  
15  
16  
17  
18  
19  
20  
21  
22  
23  
24  
25  
26  
27  
28  
29  
30  
31  
32  
33  
34  
35  
36  
37  
38  
39  
40  
41  
42  
43  
44  
45  
46  
47  
48  
49  
50  
51  
52  
53  
54  
55  
56  
57  
58  
59  
60

For peer review only

1  
2  
3 570 **Figures**

4  
5  
6 571 **Fig 1. Direct (within-trial) and legacy (post-trial) effects of statins on CVD mortality for**  
7  
8 572 **8 trials**

9  
10  
11 573 Note: Within primary and secondary prevention subgroups, studies are ordered by duration of  
12  
13 574 follow-up.

14  
15  
16 575 **Fig 2. Direct (within-trial) and legacy (post-trial) effects of statins on All-cause mortality**  
17  
18 576 **for 8 trials.**

19  
20  
21 577 Note: Within primary and secondary prevention subgroups, studies are ordered by duration of  
22  
23 578 follow-up.

24  
25  
26 579 **Fig 3. Random effects meta-analysis of relative risks for legacy (post-trial) effects of**  
27  
28 580 **statins on CVD mortality for 8 trials**

29  
30  
31 581 Note: Within primary and secondary prevention subgroups, studies are ordered by duration of  
32  
33 582 follow-up.

34  
35  
36 583 **Fig 4. Random effects meta-analysis of relative risks for legacy (post-trial) effects of**  
37  
38 584 **statins on All-cause mortality for 8 trials.**

39  
40  
41 585 Note: Within primary and secondary prevention subgroups, studies are ordered by duration of  
42  
43 586 follow-up.

44  
45  
46 587 **Fig 5: Random effects meta-analysis of Hazard Ratios for legacy (post-trial) effects of**  
47  
48 588 **statins on CVD mortality for 4 trials**

49  
50  
51 589 Note: Within primary and secondary prevention subgroups, studies are ordered by duration of  
52  
53 590 follow-up.

1  
2  
3 591  
4  
5

6 592 **Fig 6: Random effects meta-analysis of Hazard Ratios for legacy (post-trial) effects of**  
7  
8 593 **statins on All-cause mortality for 4 trials**

9  
10  
11 594 Note: Within primary and secondary prevention subgroups, studies are ordered by duration of  
12  
13 595 follow-up.

14  
15  
16 596 **Fig 7: Random effects meta-analysis of Hazard Ratios for legacy (post-trial) effects of**  
17  
18 597 **statins on CVD mortality for 3 primary prevention trials**

19  
20  
21 598 Note: Studies are ordered by duration of follow-up.

22  
23  
24 599 **Fig 8: Random effects meta-analysis of Hazard Ratios for legacy (post-trial) effects of**  
25  
26 600 **statins on All-cause mortality for 3 primary prevention trials.**

27  
28  
29 601 Note: Studies are ordered by duration of follow-up.  
30  
31  
32  
33  
34  
35  
36  
37  
38  
39  
40  
41  
42  
43  
44  
45  
46  
47  
48  
49  
50  
51  
52  
53  
54  
55  
56  
57  
58  
59  
60

602 **Table 1. Characteristics of the 8 included studies**

| Study                                                  | Target population                                                 | Dates of recruitment | Mean follow-up (years) | Statin            | Number of participants | Proportion of women (%) | Mean age (range, years) | Diabetes (%) | History of CVD (%) | Duration of post-trial follow-up | Difference in proportion taking statins post-trial (%) |
|--------------------------------------------------------|-------------------------------------------------------------------|----------------------|------------------------|-------------------|------------------------|-------------------------|-------------------------|--------------|--------------------|----------------------------------|--------------------------------------------------------|
| <b>Primary Prevention/<br/>Primary care population</b> |                                                                   |                      |                        |                   |                        |                         |                         |              |                    |                                  |                                                        |
| <b>ALLHAT-LLT</b>                                      | Treated for high BP with high cholesterol                         | 1994-1998            | 4.8                    | Pravastatin 40mg  | 10355                  | 49                      | 66 (55-?)               | 35           | 11                 | 4                                | ?                                                      |
| <b>ASCOT-LLA</b>                                       | High BP and no history of CHD, with 3+ other CVD risk factors     | 1998-2000            | 3.2                    | Atorvastatin 10mg | 10305                  | 19                      | 63 (40-79)              | 25           | 14                 | 8.3                              | 4                                                      |
| <b>WOSCOPS</b>                                         | Men with high cholesterol and no history of myocardial infarction | 1989-1991            | 4.8                    | Pravastatin 40mg  | 6595                   | 0                       | 55 (45-64)              | 1            | 8                  | 15.1                             | 4                                                      |
| <b>Secondary Prevention/<br/>Clinical population</b>   |                                                                   |                      |                        |                   |                        |                         |                         |              |                    |                                  |                                                        |

|    |                |                                                                                     |           |     |                     |       |    |             |    |     |     |   |
|----|----------------|-------------------------------------------------------------------------------------|-----------|-----|---------------------|-------|----|-------------|----|-----|-----|---|
| 1  |                |                                                                                     |           |     |                     |       |    |             |    |     |     |   |
| 2  |                |                                                                                     |           |     |                     |       |    |             |    |     |     |   |
| 3  |                |                                                                                     |           |     |                     |       |    |             |    |     |     |   |
| 4  |                |                                                                                     |           |     |                     |       |    |             |    |     |     |   |
| 5  | <b>ALERT</b>   | Renal or combined renal and pancreas transplant recipients at high risk of CVD      | 1996-1997 | 5.1 | Fluvastatin 40mg    | 2102  | 34 | 50 (30-75)  | 19 | 19  | 1.6 | 0 |
| 6  |                |                                                                                     |           |     |                     |       |    |             |    |     |     |   |
| 7  |                |                                                                                     |           |     |                     |       |    |             |    |     |     |   |
| 8  |                |                                                                                     |           |     |                     |       |    |             |    |     |     |   |
| 9  |                |                                                                                     |           |     |                     |       |    |             |    |     |     |   |
| 10 |                |                                                                                     |           |     |                     |       |    |             |    |     |     |   |
| 11 |                |                                                                                     |           |     |                     |       |    |             |    |     |     |   |
| 12 |                |                                                                                     |           |     |                     |       |    |             |    |     |     |   |
| 13 | <b>SSSS</b>    | History of angina or myocardial infarction                                          | 1988-1989 | 5.2 | Simvastatin 20-40mg | 4444  | 19 | 60+ (35-70) | 5  | 100 | 5   | 4 |
| 14 |                |                                                                                     |           |     |                     |       |    |             |    |     |     |   |
| 15 |                |                                                                                     |           |     |                     |       |    |             |    |     |     |   |
| 16 | <b>PROSPER</b> | ≥70 years with history of CVD or at high risk of CVD                                | 1997-1999 | 3.2 | Pravastatin 40mg    | 5804  | 52 | 75 (70-82)  | 11 | 44  | 5.4 | ? |
| 17 |                |                                                                                     |           |     |                     |       |    |             |    |     |     |   |
| 18 |                |                                                                                     |           |     |                     |       |    |             |    |     |     |   |
| 19 |                |                                                                                     |           |     |                     |       |    |             |    |     |     |   |
| 20 |                |                                                                                     |           |     |                     |       |    |             |    |     |     |   |
| 21 | <b>HPS</b>     | Coronary disease, other occlusive arterial disease, diabetes or treated for high BP | 1994-1997 | 5.0 | Simvastatin 40mg    | 20536 | 25 | 64 (40-80)  | 29 | 85  | 5.7 | 0 |
| 22 |                |                                                                                     |           |     |                     |       |    |             |    |     |     |   |
| 23 |                |                                                                                     |           |     |                     |       |    |             |    |     |     |   |
| 24 |                |                                                                                     |           |     |                     |       |    |             |    |     |     |   |
| 25 |                |                                                                                     |           |     |                     |       |    |             |    |     |     |   |
| 26 |                |                                                                                     |           |     |                     |       |    |             |    |     |     |   |
| 27 |                |                                                                                     |           |     |                     |       |    |             |    |     |     |   |
| 28 |                |                                                                                     |           |     |                     |       |    |             |    |     |     |   |
| 29 | <b>LIPID</b>   | Myocardial infarction or hospitalization for unstable angina                        | 1990-1992 | 5.6 | Pravastatin 40mg    | 9014  | 17 | 62 (31-75)  | 9  | >99 | 10  | 1 |
| 30 |                |                                                                                     |           |     |                     |       |    |             |    |     |     |   |
| 31 |                |                                                                                     |           |     |                     |       |    |             |    |     |     |   |
| 32 |                |                                                                                     |           |     |                     |       |    |             |    |     |     |   |
| 33 |                |                                                                                     |           |     |                     |       |    |             |    |     |     |   |
| 34 |                |                                                                                     |           |     |                     |       |    |             |    |     |     |   |
| 35 | 603            |                                                                                     |           |     |                     |       |    |             |    |     |     |   |
| 36 | 604            | <b>Notes</b>                                                                        |           |     |                     |       |    |             |    |     |     |   |
| 37 |                |                                                                                     |           |     |                     |       |    |             |    |     |     |   |
| 38 | 605            | 1. CVD = Cardiovascular Disease                                                     |           |     |                     |       |    |             |    |     |     |   |
| 39 |                |                                                                                     |           |     |                     |       |    |             |    |     |     |   |
| 40 |                |                                                                                     |           |     |                     |       |    |             |    |     |     |   |
| 41 |                |                                                                                     |           |     |                     |       |    |             |    |     |     |   |
| 42 |                |                                                                                     |           |     |                     |       |    |             |    |     |     |   |
| 43 |                |                                                                                     |           |     |                     |       |    |             |    |     |     |   |
| 44 |                |                                                                                     |           |     |                     |       |    |             |    |     |     |   |
| 45 |                |                                                                                     |           |     |                     |       |    |             |    |     |     |   |
| 46 |                |                                                                                     |           |     |                     |       |    |             |    |     |     |   |
| 47 |                |                                                                                     |           |     |                     |       |    |             |    |     |     |   |



1  
2  
3  
4  
5  
6  
7  
8  
9  
10  
11  
12  
13  
14  
15  
16  
17  
18  
19  
20  
21  
22  
23  
24  
25  
26  
27  
28  
29  
30  
31  
32  
33  
34  
35  
36  
37  
38  
39  
40  
41  
42  
43  
44  
45  
46  
47

606 Order of trials within primary prevention and secondary prevention order is from shortest post-trial follow-up to longest.

For peer review only

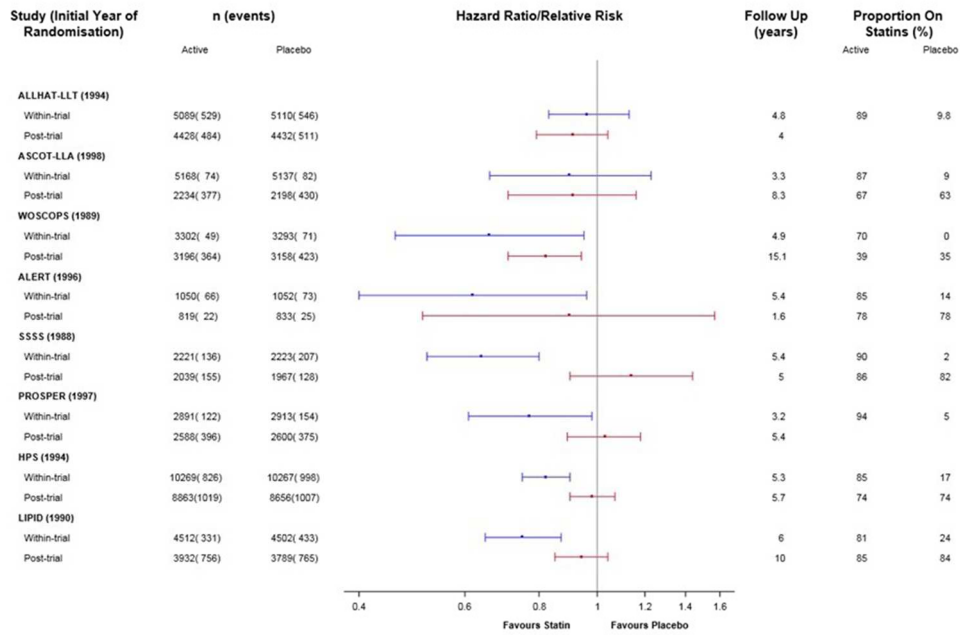

Fig 1. Direct (within-trial) and legacy (post-trial) effects of statins on CVD mortality. † Note: Within primary and secondary prevention subgroups, studies are ordered by duration of follow-up.

81x57mm (300 x 300 DPI)

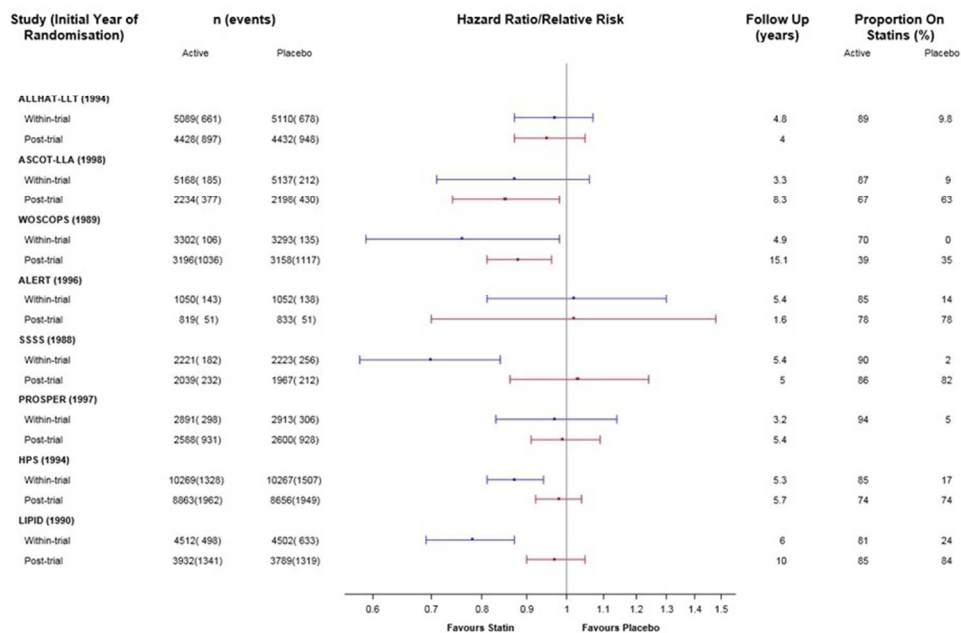

Fig 2. Direct (within-trial) and legacy (post-trial) effects of statins on All-cause mortality.

Note: Within primary and secondary prevention subgroups, studies are ordered by duration of follow-up.

80x55mm (300 x 300 DPI)

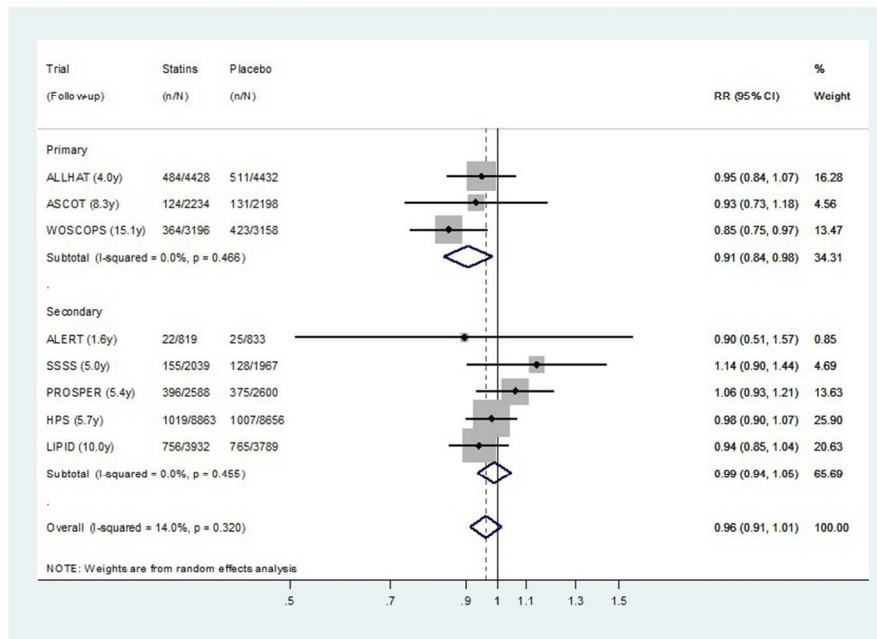

Fig 3. Random effects meta-analysis of relative risks for legacy (post-trial) effects of statins on CVD mortality. Note: Within primary and secondary prevention subgroups, studies are ordered by duration of follow-up.

80x53mm (300 x 300 DPI)

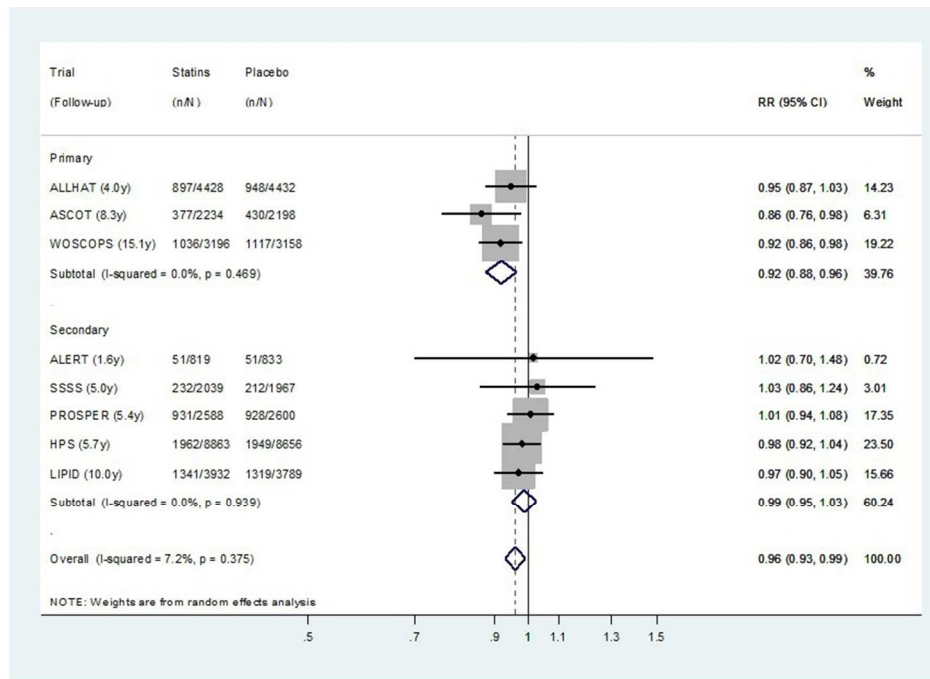

Fig 4. Random effects meta-analysis of relative risks for legacy (post-trial) effects of statins on All cause mortality. † † Note: Within primary and secondary prevention subgroups, studies are ordered by duration of follow-up. † †

77x54mm (300 x 300 DPI)

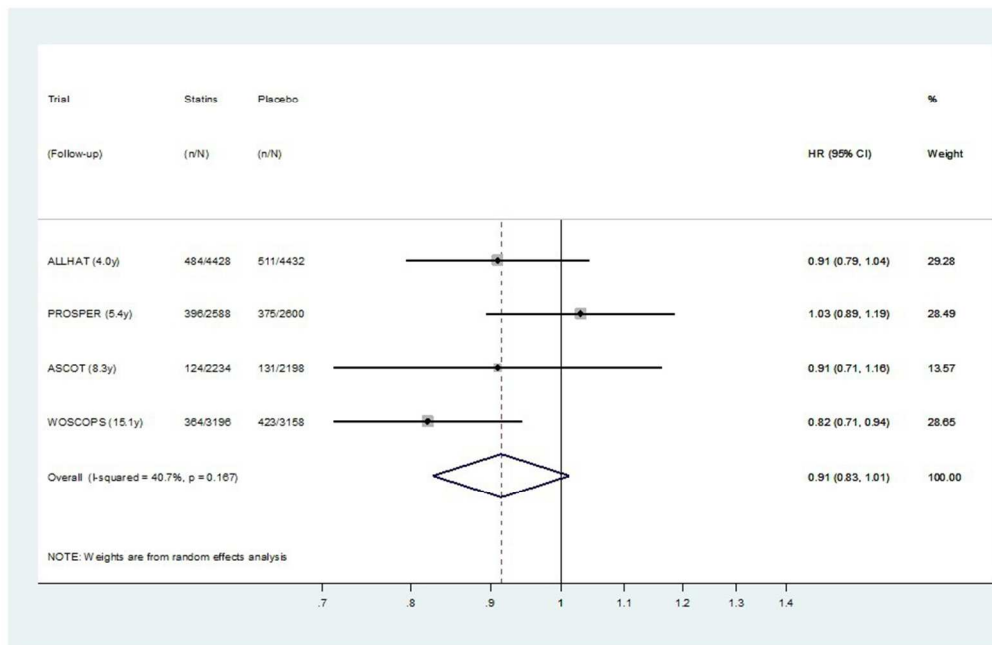

Fig 5: Random effects meta-analysis of Hazard Ratios for legacy (post-trial) effects of statins on CVD mortality for 4 trials. Note: Within primary and secondary prevention subgroups, studies are ordered by duration of follow-up.

79x54mm (300 x 300 DPI)

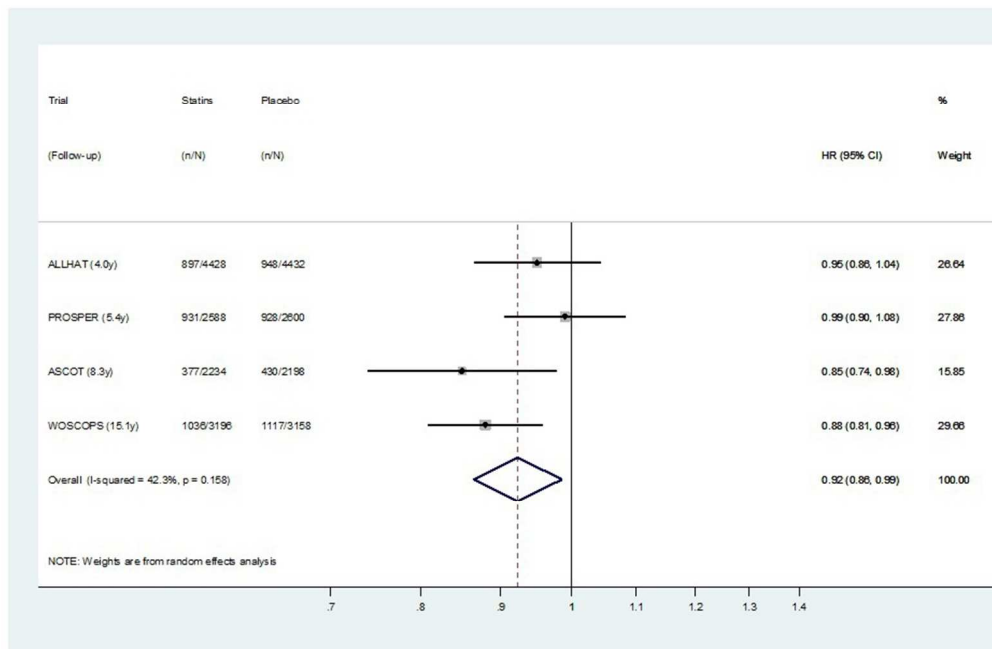

Fig 6: Random effects meta-analysis of Hazard Ratios for legacy (post-trial) effects of statins on All-cause mortality for 4 trials.

Note: Within primary and secondary prevention subgroups, studies are ordered by duration of follow-up.

78x54mm (300 x 300 DPI)

1  
2  
3  
4  
5  
6  
7  
8  
9  
10  
11  
12  
13  
14  
15  
16  
17  
18  
19  
20  
21  
22  
23  
24  
25  
26  
27  
28  
29  
30  
31  
32  
33  
34  
35  
36  
37  
38  
39  
40  
41  
42  
43  
44  
45  
46  
47  
48  
49  
50  
51  
52  
53  
54  
55  
56  
57  
58  
59  
60

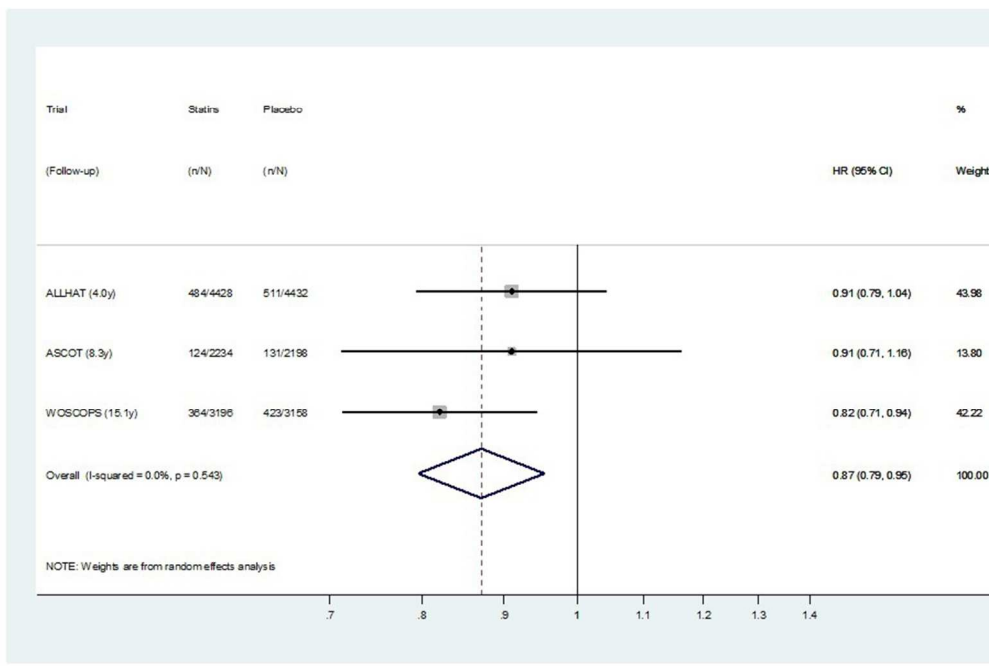

Fig 7. Random effects meta-analysis of Hazard Ratios for legacy (post-trial) effects of statins on CVD mortality for 3 primary prevention trials.† † Note: Within primary and secondary prevention subgroups, studies are ordered by duration of follow-up.

76x54mm (300 x 300 DPI)



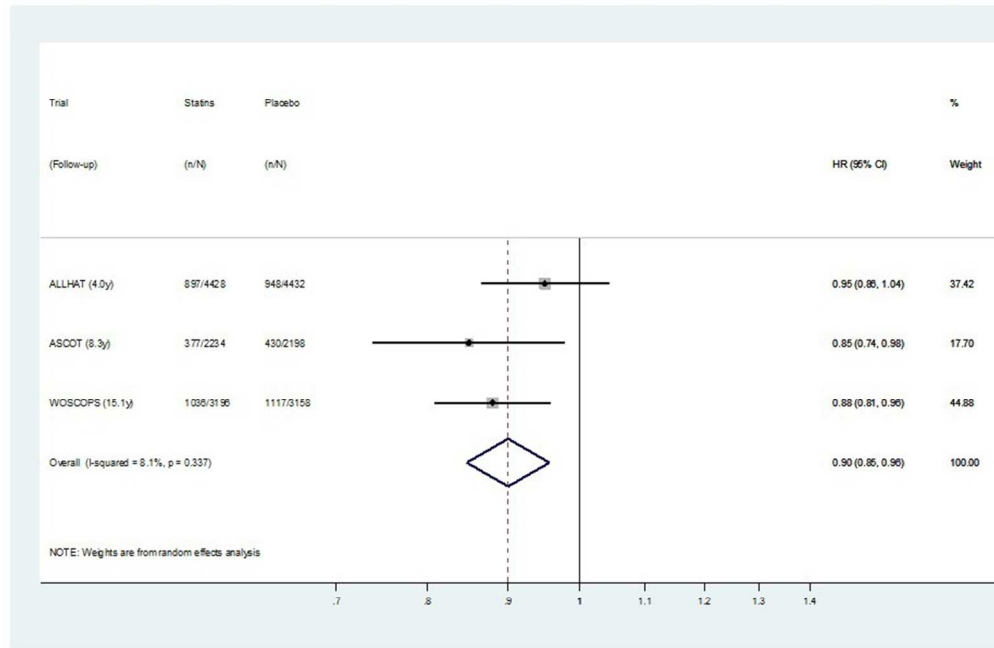

Fig 8: Random effects meta-analysis of Hazard Ratios for legacy (post-trial) effects of statins on All-cause mortality for 3 primary prevention trials. Note: Within primary and secondary prevention subgroups, studies are ordered by duration of follow-up.

77x54mm (300 x 300 DPI)

## Simulation

We simulated outcomes for 4,000 people with equivalent pre-trial five-year CVD risk estimates for those who were randomized to have a statin or placebo. First, we set our simulation to include 2,000 people with baseline five-year risk of CVD mortality of 5% (high risk group) and 2,000 people with five-year risk of CV mortality of 1% (low risk group). Second, within the two risk groups we randomized individuals to statin or placebo at a ratio of 1:1. Third, we applied a relative risk reduction on CVD mortality of 0.80 for individuals randomized to statin for the five years of the trial period. Fourth, we applied 0.90 relative risk reduction for the scenario of a legacy effect (eFigure 1A & 1B) and applied no relative risk reduction for the scenario of no legacy effect (eFigure 1C & 1D). After the trial, all individuals were followed until they had an event, up to a further 20 years. For simplicity, we did not include any effects for aging in the model. The simulation was run 1000 times in R 3.3.1. Survival and hazard curves were generated by calculating the average results.

## eFigure 1. Survival and Hazard curves using simulated data.

Fig 1A. Survival curves using simulated data where there is a legacy effect. Fig 1B. Hazard curves using simulated data where there is a legacy effect.

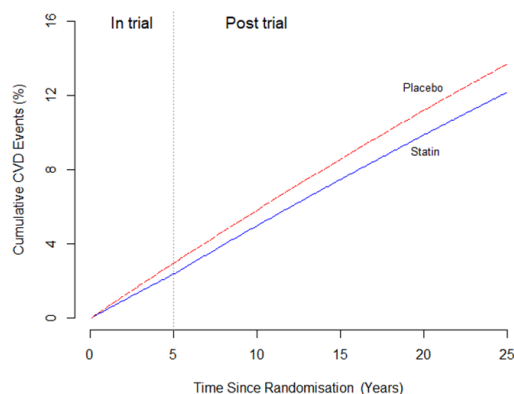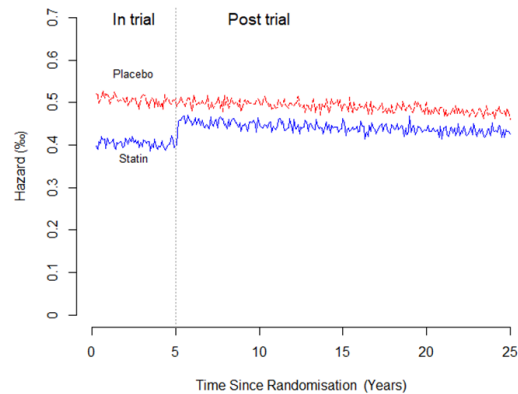

Fig 1C. Survival curves using simulated data where there is no legacy effect. Fig 1D. Hazard curves using simulated data where there is no legacy effect.

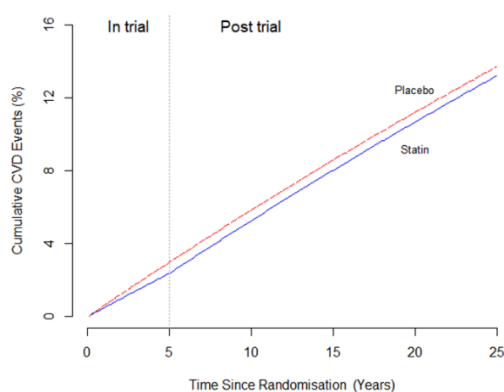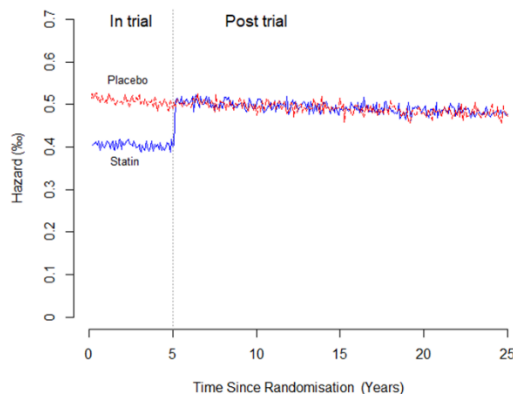

1A: Survival Curves, legacy effect; 1B: Hazard Curves, legacy effect; 1C: Survival Curves, no legacy effect; 1D: Hazard Curves, no legacy effect

During RCT period (5 years): Relative Risk Reduction for CVD mortality=0.80; during post-trial period (20 years): Relative Risk Reduction for CVD mortality =1 (i.e. no legacy effect).

Exaggeration of apparent legacy benefit is observed in the Survival Curves because of contribution of within-trial treatment effects on cumulative incidence. Unbiased estimation

1  
2  
3 of post-trial legacy effects are shown in the Hazard Curves (note that these are curves of the  
4  
5 instantaneous hazard at each time point, and are not curves of hazard ratios).  
6  
7  
8  
9  
10  
11  
12  
13  
14  
15  
16  
17  
18  
19  
20  
21  
22  
23  
24  
25  
26  
27  
28  
29  
30  
31  
32  
33  
34  
35  
36  
37  
38  
39  
40  
41  
42  
43  
44  
45  
46  
47  
48  
49  
50  
51  
52  
53  
54  
55  
56  
57  
58  
59  
60

For peer review only

eFigure 2. Selection of primary studies

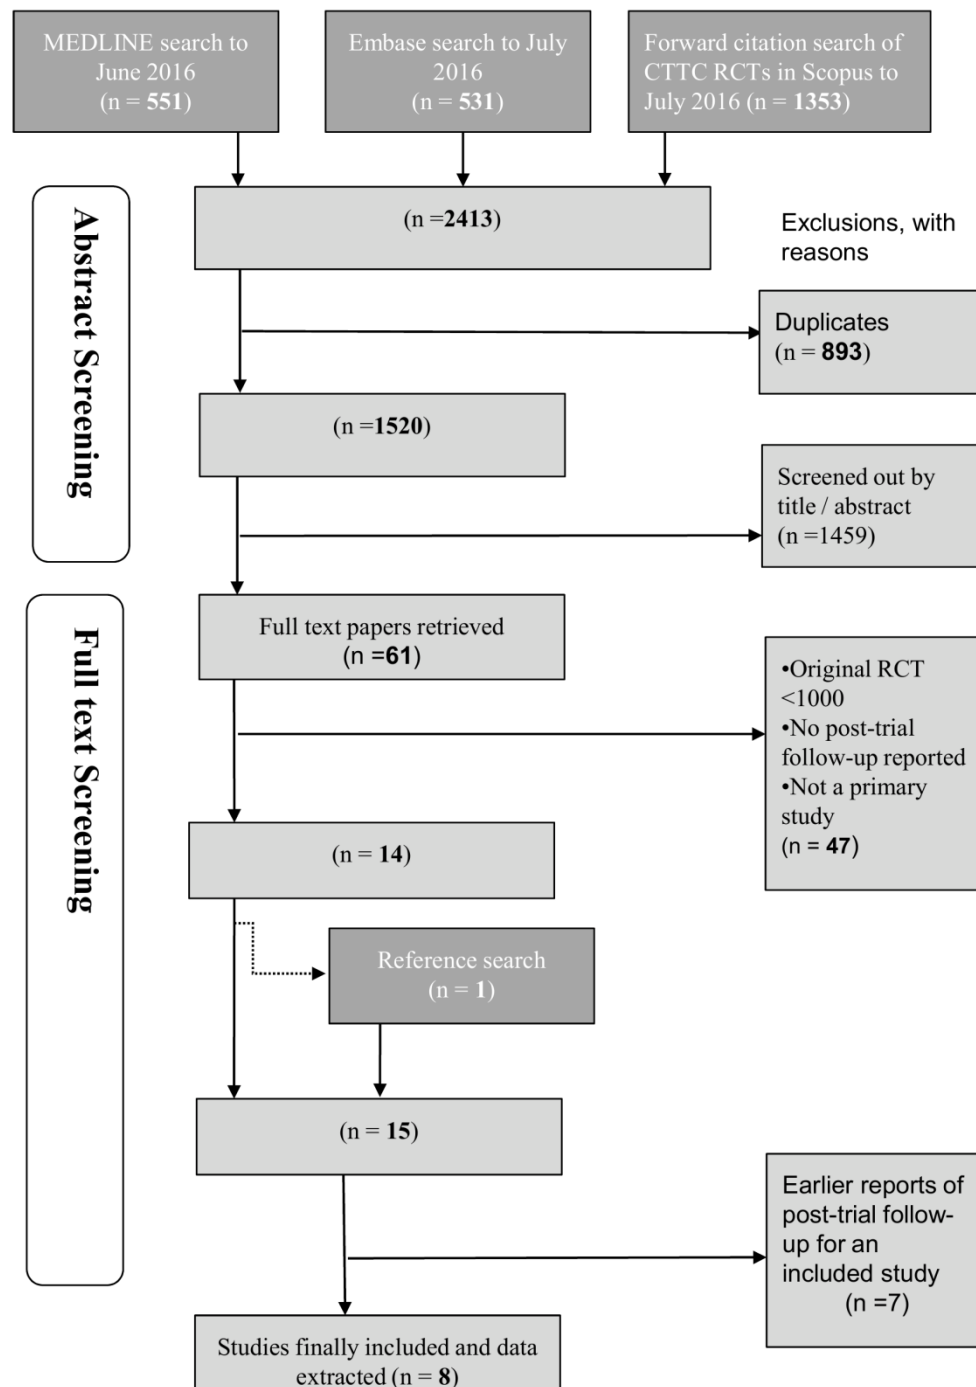

CTTC = Cholesterol Treatment Trialists' Collaboration

eTable 1 Effect of treatment allocation on All-cause mortality and CVD-mortality reported within trial period

| Study      | Difference in proportion taking statins within-trial (%) <sup>1</sup> | Allocated to statins |            |            | Allocated to placebo |            |            | Risk Estimates                      |                                     |
|------------|-----------------------------------------------------------------------|----------------------|------------|------------|----------------------|------------|------------|-------------------------------------|-------------------------------------|
|            |                                                                       | N                    | All deaths | CVD deaths | N                    | All deaths | CVD deaths | All deaths                          | CVD deaths                          |
| ALLHAT-LLT | 79                                                                    | 5089                 | 661        | 529        | 5110                 | 678        | 546        | 0.97 (0.87-1.07) <sup>2</sup>       | 0.96 (0.83-1.13) <sup>2</sup>       |
| ASCOT-LLA  | 78                                                                    | 5168                 | 460        | 154        | 5137                 | 520        | 167        | 0.87 (0.71-1.06) <sup>2</sup>       | 0.90 (0.66-1.23) <sup>2</sup>       |
| WOSCOPS    | 70                                                                    | 3302                 | 106        | 49         | 3293                 | 135        | 71         | <b>0.76 (0.59-0.98)<sup>2</sup></b> | <b>0.66 (0.46-0.95)<sup>2</sup></b> |
| ALERT      | 71                                                                    | 1050                 | 143        | 66         | 1052                 | 138        | 73         | 1.02 (0.81-1.30) <sup>3</sup>       | <b>0.62 (0.40-0.96)<sup>3</sup></b> |
| SSSS       | 88                                                                    | 2221                 | 182        | 136        | 2223                 | 256        | 207        | <b>0.70 (0.58-0.84)<sup>3</sup></b> | <b>0.64 (0.52-0.80)<sup>3</sup></b> |
| PROSPER    | 89                                                                    | 2891                 | 298        | 122        | 2913                 | 306        | 154        | 0.97 (0.83-1.14) <sup>2</sup>       | <b>0.77 (0.61-0.98)<sup>2</sup></b> |
| HPS        | 68                                                                    | 10269                | 1328       | 826        | 10267                | 1507       | 998        | <b>0.87(0.81-0.94)<sup>3</sup></b>  | <b>0.82 (0.75-0.90)<sup>3</sup></b> |
| LIPID      | 57                                                                    | 4512                 | 498        | 331        | 4502                 | 633        | 433        | <b>0.77 (0.69-0.87)<sup>3</sup></b> | <b>0.75 (0.65-0.87)<sup>3</sup></b> |

## Notes

1. Difference in % taking statins = [% taking statins in group allocated to statin in trial - % taking statins in group allocated to placebo in trial]
2. Studies reporting Hazard Ratio
3. Studies reporting Relative Risk

- 1
  - 2
  - 3
  - 4
  - 5
  - 6
  - 7
  - 8
  - 9
  - 10
  - 11
  - 12
  - 13
  - 14
  - 15
  - 16
  - 17
  - 18
  - 19
  - 20
  - 21
  - 22
  - 23
  - 24
  - 25
  - 26
  - 27
  - 28
  - 29
  - 30
  - 31
  - 32
  - 33
  - 34
  - 35
  - 36
  - 37
  - 38
  - 39
  - 40
  - 41
  - 42
  - 43
  - 44
  - 45
  - 46
4. Statistically significant results are **bolded**
  5. CVD = Cardiovascular Disease
  6. Order of trials within primary prevention and secondary prevention is from shortest post-trial follow-up to longest.

For peer review only

eTable 2 Effect of treatment allocation on All-cause mortality and CVD-mortality reported for post-trial period

| Study      | Average post-trial follow-up | Difference in proportion taking statins post-trial (%) <sup>1</sup> | Allocated to statins |            |            | Allocated to placebo |            |            | Risk Ratio                          |                                     |
|------------|------------------------------|---------------------------------------------------------------------|----------------------|------------|------------|----------------------|------------|------------|-------------------------------------|-------------------------------------|
|            |                              |                                                                     | N <sup>4</sup>       | All deaths | CVD deaths | N <sup>4</sup>       | All deaths | CVD deaths | All deaths                          | CVD deaths                          |
| ALLHAT-LLT | 4                            | ?                                                                   | 4428                 | 897        | 484        | 4432                 | 948        | 511        | 0.91 (0.79–1.04) <sup>2</sup>       | 0.95 (0.87-1.05) <sup>2</sup>       |
| ASCOT-LLA  | 8.3                          | 4                                                                   | 2234                 | 377        | 124        | 2198                 | 430        | 131        | <b>0.85 (0.74-0.98)<sup>2</sup></b> | 0.91 (0.71-1.16) <sup>2</sup>       |
| WOSCOPS    | 15.1                         | 4                                                                   | 3196                 | 1036       | 364        | 3158                 | 1117       | 423        | <b>0.88 (0.81-0.96)<sup>2</sup></b> | <b>0.82 (0.71-0.94)<sup>2</sup></b> |
| ALERT      | 1.6                          | 0                                                                   | 811                  | 51         | 22         | 820                  | 51         | 25         | 1.01 (0.69 - 1.47) <sup>3</sup>     | 0.89 (0.51 - 1.56) <sup>3</sup>     |
| SSSS       | 5                            | 4                                                                   | 2039                 | 232        | 155        | 1967                 | 212        | 128        | 1.03 (0.86-1.24) <sup>3</sup>       | 1.14 (0.90-1.44) <sup>3</sup>       |
| PROSPER    | 5.4                          | ?                                                                   | 2588                 | 931        | 396        | 2600                 | 928        | 375        | 0.99 (0.91-1.09) <sup>2</sup>       | 1.03 (0.89-1.18) <sup>2</sup>       |
| HPS        | 5.7                          | 0                                                                   | 8863                 | 1962       | 1019       | 8656                 | 1949       | 1007       | 0.98 (0.90-1.07) <sup>3</sup>       | 0.98 (0.92-1.04) <sup>3</sup>       |
| LIPID      | 10                           | 1                                                                   | 3932                 | 1341       | 756        | 3789                 | 1319       | 765        | 0.97 (0.90-1.05) <sup>3</sup>       | 0.94 (0.85-1.04) <sup>3</sup>       |

## Notes

1. Difference in % taking statins = [% taking statins in group allocated to statin in trial - % taking statins in group allocated to placebo in trial]
2. Studies reporting Hazard Ratio
3. Studies reporting Relative Risk
4. Number alive and followed post-trial
5. Statistically significant results are **bolded**



1  
2  
3  
4  
5  
6  
7  
8  
9  
10  
11  
12  
13  
14  
15  
16  
17  
18  
19  
20  
21  
22  
23  
24  
25  
26  
27  
28  
29  
30  
31  
32  
33  
34  
35  
36  
37  
38  
39  
40  
41  
42  
43  
44  
45  
46

- 6. CVD = Cardiovascular Disease
- 7. Order of trials within primary prevention and secondary prevention is from shortest post-trial follow-up to longest

For peer review only

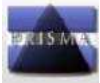

# PRISMA 2009 Checklist

| Section/topic                      | #  | Checklist item                                                                                                                                                                                                                                                                                              | Reported on page # |
|------------------------------------|----|-------------------------------------------------------------------------------------------------------------------------------------------------------------------------------------------------------------------------------------------------------------------------------------------------------------|--------------------|
| <b>TITLE</b>                       |    |                                                                                                                                                                                                                                                                                                             |                    |
| Title                              | 1  | Identify the report as a systematic review, meta-analysis, or both.                                                                                                                                                                                                                                         | 1                  |
| <b>ABSTRACT</b>                    |    |                                                                                                                                                                                                                                                                                                             |                    |
| Structured summary                 | 2  | Provide a structured summary including, as applicable: background; objectives; data sources; study eligibility criteria, participants, and interventions; study appraisal and synthesis methods; results; limitations; conclusions and implications of key findings; systematic review registration number. | 3-4                |
| <b>INTRODUCTION</b>                |    |                                                                                                                                                                                                                                                                                                             |                    |
| Rationale                          | 3  | Describe the rationale for the review in the context of what is already known.                                                                                                                                                                                                                              | 6-8                |
| Objectives                         | 4  | Provide an explicit statement of questions being addressed with reference to participants, interventions, comparisons, outcomes, and study design (PICOS).                                                                                                                                                  | 8                  |
| <b>METHODS</b>                     |    |                                                                                                                                                                                                                                                                                                             |                    |
| Protocol and registration          | 5  | Indicate if a review protocol exists, if and where it can be accessed (e.g., Web address), and, if available, provide registration information including registration number.                                                                                                                               | 8                  |
| Eligibility criteria               | 6  | Specify study characteristics (e.g., PICOS, length of follow-up) and report characteristics (e.g., years considered, language, publication status) used as criteria for eligibility, giving rationale.                                                                                                      | 8                  |
| Information sources                | 7  | Describe all information sources (e.g., databases with dates of coverage, contact with study authors to identify additional studies) in the search and date last searched.                                                                                                                                  | 8-9                |
| Search                             | 8  | Present full electronic search strategy for at least one database, including any limits used, such that it could be repeated.                                                                                                                                                                               | 9 (Box 1)          |
| Study selection                    | 9  | State the process for selecting studies (i.e., screening, eligibility, included in systematic review, and, if applicable, included in the meta-analysis).                                                                                                                                                   | 9-10               |
| Data collection process            | 10 | Describe method of data extraction from reports (e.g., piloted forms, independently, in duplicate) and any processes for obtaining and confirming data from investigators.                                                                                                                                  | 9-10               |
| Data items                         | 11 | List and define all variables for which data were sought (e.g., PICOS, funding sources) and any assumptions and simplifications made.                                                                                                                                                                       | 9-10               |
| Risk of bias in individual studies | 12 | Describe methods used for assessing risk of bias of individual studies (including specification of whether this was done at the study or outcome level), and how this information is to be used in any data synthesis.                                                                                      | 9,15               |
| Summary measures                   | 13 | State the principal summary measures (e.g., risk ratio, difference in means).                                                                                                                                                                                                                               | 10                 |
| Synthesis of results               | 14 | Describe the methods of handling data and combining results of studies, if done, including measures of consistency (e.g., $I^2$ ) for each meta-analysis.                                                                                                                                                   | 10                 |

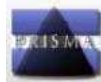

# PRISMA 2009 Checklist

Page 1 of 2

| Section/topic                 | #  | Checklist item                                                                                                                                                                                           | Reported on page #               |
|-------------------------------|----|----------------------------------------------------------------------------------------------------------------------------------------------------------------------------------------------------------|----------------------------------|
| Risk of bias across studies   | 15 | Specify any assessment of risk of bias that may affect the cumulative evidence (e.g., publication bias, selective reporting within studies).                                                             | 15                               |
| Additional analyses           | 16 | Describe methods of additional analyses (e.g., sensitivity or subgroup analyses, meta-regression), if done, indicating which were pre-specified.                                                         | 10-11                            |
| <b>RESULTS</b>                |    |                                                                                                                                                                                                          |                                  |
| Study selection               | 17 | Give numbers of studies screened, assessed for eligibility, and included in the review, with reasons for exclusions at each stage, ideally with a flow diagram.                                          | eFigure 2                        |
| Study characteristics         | 18 | For each study, present characteristics for which data were extracted (e.g., study size, PICOS, follow-up period) and provide the citations.                                                             | eTable 1                         |
| Risk of bias within studies   | 19 | Present data on risk of bias of each study and, if available, any outcome level assessment (see item 12).                                                                                                | eTable 1                         |
| Results of individual studies | 20 | For all outcomes considered (benefits or harms), present, for each study: (a) simple summary data for each intervention group (b) effect estimates and confidence intervals, ideally with a forest plot. | 11-13<br>eTables 2-3<br>Figure 1 |
| Synthesis of results          | 21 | Present results of each meta-analysis done, including confidence intervals and measures of consistency.                                                                                                  | 13-14<br>Figures 2-3             |
| Risk of bias across studies   | 22 | Present results of any assessment of risk of bias across studies (see Item 15).                                                                                                                          | -                                |
| Additional analysis           | 23 | Give results of additional analyses, if done (e.g., sensitivity or subgroup analyses, meta-regression [see Item 16]).                                                                                    | 13-14<br>Figures 2A, 2B, 3C,3D   |
| <b>DISCUSSION</b>             |    |                                                                                                                                                                                                          |                                  |
| Summary of evidence           | 24 | Summarize the main findings including the strength of evidence for each main outcome; consider their relevance to key groups (e.g., healthcare providers, users, and policy makers).                     | 14                               |
| Limitations                   | 25 | Discuss limitations at study and outcome level (e.g., risk of bias), and at review-level (e.g., incomplete retrieval of identified research, reporting bias).                                            | 15-16                            |
| Conclusions                   | 26 | Provide a general interpretation of the results in the context of other evidence, and implications for future research.                                                                                  | 17-18                            |

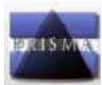

# PRISMA 2009 Checklist

1  
2  
3  
4  
5  
6  
7  
8  
9  
10  
11  
12  
13  
14  
15  
16  
17  
18  
19  
20  
21  
22  
23  
24  
25  
26  
27  
28  
29  
30  
31  
32  
33  
34  
35  
36  
37  
38  
39  
40  
41  
42  
43  
44  
45  
46  
47

|                |    |                                                                                                                                            |   |
|----------------|----|--------------------------------------------------------------------------------------------------------------------------------------------|---|
| <b>FUNDING</b> |    |                                                                                                                                            |   |
| Funding        | 27 | Describe sources of funding for the systematic review and other support (e.g., supply of data); role of funders for the systematic review. | 5 |

From: Moher D, Liberati A, Tetzlaff J, Altman DG, The PRISMA Group (2009). Preferred Reporting Items for Systematic Reviews and Meta-Analyses: The PRISMA Statement. PLoS Med 6(7): e1000097. doi:10.1371/journal.pmed1000097

For more information, visit: [www.prisma-statement.org](http://www.prisma-statement.org).

Page 2 of 2

For peer review only
