# Supplementary material for: Legacy effects of statins on cardiovascular and all-cause mortality: a meta-analysis
Source: PubMed Central journal article supplement — BMJ Open. 2018 Oct 4;8(9):e020584. doi: 10.1136/bmjopen-2017-020584 (PMC6173243; doi:10.1136/bmjopen-2017-020584), 2018-10-04
Supplement: bmjopen-2017-020584supp002.pdf [file bmjopen-2017-020584supp002.pdf]

eTable 1 Effect of treatment allocation on All-cause mortality and CVD-mortality reported within trial period

| Study      | Difference in proportion taking statins within-trial (%) <sup>1</sup> | Allocated to statins |            |            | Allocated to placebo |            |            | Risk Estimates                      |                                     |
|------------|-----------------------------------------------------------------------|----------------------|------------|------------|----------------------|------------|------------|-------------------------------------|-------------------------------------|
|            |                                                                       | N                    | All deaths | CVD deaths | N                    | All deaths | CVD deaths | All deaths                          | CVD deaths                          |
| ALLHAT-LLT | 79                                                                    | 5089                 | 661        | 529        | 5110                 | 678        | 546        | 0.97 (0.87-1.07) <sup>2</sup>       | 0.96 (0.83-1.13) <sup>2</sup>       |
| ASCOT-LLA  | 78                                                                    | 5168                 | 460        | 154        | 5137                 | 520        | 167        | 0.87 (0.71-1.06) <sup>2</sup>       | 0.90 (0.66-1.23) <sup>2</sup>       |
| WOSCOPS    | 70                                                                    | 3302                 | 106        | 49         | 3293                 | 135        | 71         | <b>0.76 (0.59-0.98)<sup>2</sup></b> | <b>0.66 (0.46-0.95)<sup>2</sup></b> |
| ALERT      | 71                                                                    | 1050                 | 143        | 66         | 1052                 | 138        | 73         | 1.02 (0.81-1.30) <sup>3</sup>       | <b>0.62 (0.40-0.96)<sup>3</sup></b> |
| SSSS       | 88                                                                    | 2221                 | 182        | 136        | 2223                 | 256        | 207        | <b>0.70 (0.58-0.84)<sup>3</sup></b> | <b>0.64 (0.52-0.80)<sup>3</sup></b> |
| PROSPER    | 89                                                                    | 2891                 | 298        | 122        | 2913                 | 306        | 154        | 0.97 (0.83-1.14) <sup>2</sup>       | <b>0.77 (0.61-0.98)<sup>2</sup></b> |
| HPS        | 68                                                                    | 10269                | 1328       | 826        | 10267                | 1507       | 998        | <b>0.87(0.81-0.94)<sup>3</sup></b>  | <b>0.82 (0.75-0.90)<sup>3</sup></b> |
| LIPID      | 57                                                                    | 4512                 | 498        | 331        | 4502                 | 633        | 433        | <b>0.77 (0.69-0.87)<sup>3</sup></b> | <b>0.75 (0.65-0.87)<sup>3</sup></b> |

Notes

1. Difference in % taking statins = [% taking statins in group allocated to statin in trial - % taking statins in group allocated to placebo in trial]
2. Studies reporting Hazard Ratio
3. Studies reporting Relative Risk

4. Statistically significant results are **bolded**
5. CVD = Cardiovascular Disease
6. Order of trials within primary prevention and secondary prevention is from shortest post-trial follow-up to longest.

eTable 2 Effect of treatment allocation on All-cause mortality and CVD-mortality reported for post-trial period

| Study      | Average post-trial follow-up | Difference in proportion taking statins post-trial (%) <sup>1</sup> | Allocated to statins |            |            | Allocated to placebo |            |            | Risk Ratio                          |                                     |
|------------|------------------------------|---------------------------------------------------------------------|----------------------|------------|------------|----------------------|------------|------------|-------------------------------------|-------------------------------------|
|            |                              |                                                                     | N <sup>4</sup>       | All deaths | CVD deaths | N <sup>4</sup>       | All deaths | CVD deaths | All deaths                          | CVD deaths                          |
| ALLHAT-LLT | 4                            | ?                                                                   | 4428                 | 897        | 484        | 4432                 | 948        | 511        | 0.91 (0.79–1.04) <sup>2</sup>       | 0.95 (0.87-1.05) <sup>2</sup>       |
| ASCOT-LLA  | 8.3                          | 4                                                                   | 2234                 | 377        | 124        | 2198                 | 430        | 131        | <b>0.85 (0.74-0.98)<sup>2</sup></b> | 0.91 (0.71-1.16) <sup>2</sup>       |
| WOSCOPS    | 15.1                         | 4                                                                   | 3196                 | 1036       | 364        | 3158                 | 1117       | 423        | <b>0.88 (0.81-0.96)<sup>2</sup></b> | <b>0.82 (0.71-0.94)<sup>2</sup></b> |
| ALERT      | 1.6                          | 0                                                                   | 811                  | 51         | 22         | 820                  | 51         | 25         | 1.01 (0.69 - 1.47) <sup>3</sup>     | 0.89 (0.51 - 1.56) <sup>3</sup>     |
| SSSS       | 5                            | 4                                                                   | 2039                 | 232        | 155        | 1967                 | 212        | 128        | 1.03 (0.86-1.24) <sup>3</sup>       | 1.14 (0.90-1.44) <sup>3</sup>       |
| PROSPER    | 5.4                          | ?                                                                   | 2588                 | 931        | 396        | 2600                 | 928        | 375        | 0.99 (0.91-1.09) <sup>2</sup>       | 1.03 (0.89-1.18) <sup>2</sup>       |
| HPS        | 5.7                          | 0                                                                   | 8863                 | 1962       | 1019       | 8656                 | 1949       | 1007       | 0.98 (0.90-1.07) <sup>3</sup>       | 0.98 (0.92-1.04) <sup>3</sup>       |
| LIPID      | 10                           | 1                                                                   | 3932                 | 1341       | 756        | 3789                 | 1319       | 765        | 0.97 (0.90-1.05) <sup>3</sup>       | 0.94 (0.85-1.04) <sup>3</sup>       |

Notes

1. Difference in % taking statins = [% taking statins in group allocated to statin in trial - % taking statins in group allocated to placebo in trial]
2. Studies reporting Hazard Ratio
3. Studies reporting Relative Risk
4. Number alive and followed post-trial
5. Statistically significant results are **bolded**

6. CVD = Cardiovascular Disease
7. Order of trials within primary prevention and secondary prevention is from shortest post-trial follow-up to longest
